# Supplementary material for: Genome-Wide Transcriptional Response of Silurana (Xenopus) tropicalis to Infection with the Deadly Chytrid Fungus
Source: PLoS One. 2009 Aug 4;4(8):e6494. doi: 10.1371/journal.pone.0006494 (PMC2727658; doi:10.1371/journal.pone.0006494)
Supplement: Table S1 — Complete list of genes with significant differences in expression between naïve and Bd-exposed frogs. Table columns correspond to gene identifiers (NimbleGen, Joint Genome Institute, and Ensembl), number of probes in probe set, summary of tissues and time points for differential expression, log2 fold-changes for tissues and time points with significant differences in expression, and functional annotation (e.g., InterPro, Gene Ontology, euKaryotic Orthologous Groups). (0.40 MB XLS) [file pone.0006494.s001.xls]

## Sheet: Rosenblum et al
NimbleGen_ID	JGI_Gene_ID	Ensembl_Gene_ID	Probe_Number	Summary_Differential_Expression	Liver_Early_Coef	Skin_Early_Coef	Liver_Late_Coef	Skin_Late_Coef	Ensembl_Description	Protein_Domain	EC_Description	KOG	GO	-
XTROP0001S00010514	69767	NA	8	liver early down	-1.726				NA	IPR001190,Speract/scavenger receptor	NA	KOG3627|Trypsin|Amino acid transport and metabolism |METABOLISM	2290|scavenger receptor activity|molecular_function|GO:0005044; 7826|membrane|cellular_component|GO:0016020	-
XTROP0001S00018643	79904	ENSXETG00000006980	8	liver early down	-2.137				Mug1 protein (Fragment). [Source:UniProtKB/TrEMBL;Acc:Q5BIY8]	NA	NA	NA	NA	-
XTROP0001S00002131	80771	NA	8	liver early down	-1.484				NA	IPR001190,Speract/scavenger receptor	NA	NA	2290|scavenger receptor activity|molecular_function|GO:0005044; 7826|membrane|cellular_component|GO:0016020	-
XTROP0001S00010400	96288	NA	8	liver early down	-2.959				NA	IPR000436,Sushi/SCR/CCP	NA	NA	NA	-
XTROP0001S00006759	109293	ENSXETG00000015967	8	liver early down	-1.527				H1 histone family, member 0. [Source:UniProtKB/TrEMBL;Acc:Q6NVM0]	IPR003216,Linker histone, N-terminal;IPR005819,Histone H5;IPR005818,Histone H1/H5	NA	NA	481|nucleosome|cellular_component|GO:0000786; 1056|DNA binding|molecular_function|GO:0003677; 2757|nucleus|cellular_component|GO:0005634; 3429|nucleosome assembly|biological_process|GO:0006334; 4055|chromosome organization and biogenesis (sensu Eukaryota)|biological_process|GO:0007001	-
XTROP0001S00000531	147108	ENSXETG00000015771	8	liver early down	-1.494				Hypothetical protein (Fragment). [Source:UniProtKB/TrEMBL;Acc:Q5M903]	IPR010329,3-hydroxyanthranilic acid dioxygenase;IPR007113,Cupin region	3-hydroxyanthranilate 3,4-dioxygenase.	KOG3995|3-hydroxyanthranilate oxygenase HAAO|Amino acid transport and metabolism |METABOLISM	323|3-hydroxyanthranilate 3,4-dioxygenase activity|molecular_function|GO:0000334; 2638|iron ion binding|molecular_function|GO:0005506; 4804|metabolism|biological_process|GO:0008152	-
XTROP0001S00007629	165730	ENSXETG00000010031	3	liver early down	-2.061				NA	IPR000436,Sushi/SCR/CCP	NA	NA	NA	-
XTROP0001S00031960	165730	ENSXETG00000010031	8	liver early down	-2.048				NA	IPR000436,Sushi/SCR/CCP	NA	NA	NA	-
XTROP0001S00021201	169976	ENSXETG00000002493	8	liver early down	-1.455				NA	IPR003439,ABC transporter;IPR001140,ABC transporter, transmembrane region;IPR003593,AAA ATPase;IPR001687,ATP/GTP-binding site motif A (P-loop)	NA	NA	2653|ATP binding|molecular_function|GO:0005524; 3879|transport|biological_process|GO:0006810; 7827|integral to membrane|cellular_component|GO:0016021;13182|ATPase activity, coupled to transmembrane movement of substances|molecular_function|GO:0042626; 8614|ATPase activity|molecular_function|GO:0016887; 157|nucleotide binding|molecular_function|GO:0000166; 8812|nucleoside-triphosphatase activity|m…	-
XTROP0001S00020848	175523	ENSXETG00000013938	8	liver early down	-1.491				NA	IPR001589,Actin-binding, actinin-type	NA	NA	1126|actin binding|molecular_function|GO:0003779	-
XTROP0001S00012494	182033	NA	8	liver early down	-1.687				NA	IPR000020,Anaphylatoxin/fibulin;IPR001840,Complement C3a/C4a/C5a anaphylatoxin;IPR001599,Alpha-2-macroglobulin;IPR001134,Netrin, C-terminal;IPR002890,Alpha-2-macroglobulin, N-terminal;NULL,NULL;IPR010916,TonB box, N-terminal	NA	NA	2700|extracellular region|cellular_component|GO:0005576; 2127|endopeptidase inhibitor activity|molecular_function|GO:0004866; 4009|inflammatory response|biological_process|GO:0006954; 4011|complement activation|biological_process|GO:0006956	-
XTROP0001S00017446	184835	NA	8	liver early down	-1.734				NA	IPR001134,Netrin, C-terminal	NA	NA	NA	-
XTROP0001S00011751	185446	ENSXETG00000024219	8	liver early down	-2.108				LOC619586 protein (Fragment). [Source:UniProtKB/TrEMBL;Acc:Q566M0]	NA	NA	NA	NA	-
XTROP0001S00024502	187050	NA	8	liver early down	-1.949				NA	IPR001190,Speract/scavenger receptor	NA	KOG3627|Trypsin|Amino acid transport and metabolism |METABOLISM	2290|scavenger receptor activity|molecular_function|GO:0005044; 7826|membrane|cellular_component|GO:0016020	-
XTROP0001S00004551	212445	ENSXETG00000019317	8	liver early down	-1.858				LOC394678 protein (Fragment). [Source:UniProtKB/TrEMBL;Acc:Q6P615]	IPR000074,Apolipoprotein A1/A4/E	NA	NA	NA	-
XTROP0001S00026323	278518	ENSXETG00000003737	8	liver early down	-1.4				NA	IPR000834,Peptidase M14, carboxypeptidase A	Lysine(arginine) carboxypeptidase.	NA	1510|carboxypeptidase A activity|molecular_function|GO:0004182; 3588|proteolysis and peptidolysis|biological_process|GO:0006508; 1512|lysine carboxypeptidase activity|molecular_function|GO:0004184	-
XTROP0001S00005434	278934	NA	8	liver early down	-2.238				NA	IPR001117,Multicopper oxidase, type 1;IPR002355,Multicopper oxidase, copper-binding site	Ferroxidase.	NA	2639|copper ion binding|molecular_function|GO:0005507; 1620|ferroxidase activity|molecular_function|GO:0004322; 1621|multicopper ferroxidase iron transport mediator activity|molecular_function|GO:0004323	-
XTROP0001S00036626	279909	NA	3	liver early down	-1.483				NA	IPR000421,Coagulation factor 5/8 type, C-terminal;IPR006585,Fucolectin tachylectin-4 pentraxin-1	NA	NA	4201|cell adhesion|biological_process|GO:0007155	-
XTROP0001S00012130	281320	ENSXETG00000024219	8	liver early down	-1.849				LOC619586 protein (Fragment). [Source:UniProtKB/TrEMBL;Acc:Q566M0]	IPR001599,Alpha-2-macroglobulin;IPR002890,Alpha-2-macroglobulin, N-terminal	NA	NA	NA	-
XTROP0001S00007374	282192	ENSXETG00000006766	8	liver early down	-2.489				C9-prov protein (Fragment). [Source:UniProtKB/TrEMBL;Acc:Q5M7M6]	IPR001862,Membrane attack complex component/perforin/complement C9;IPR002172,Low density lipoprotein-receptor, class A;IPR000884,Thrombospondin, type I;IPR006209,EGF-like	NA	KOG3611|Semaphorins|Signal transduction mechanisms |CELLULAR PROCESSES AND SIGNALING	NA	-
XTROP0001S00001174	295244	ENSXETG00000003532	3	liver early down	-2.498				NA	IPR001862,Membrane attack complex component/perforin/complement C9;IPR008085,Thrombospondin, subtype 1;IPR002172,Low density lipoprotein-receptor, class A;IPR000436,Sushi/SCR/CCP;IPR000884,Thrombospondin, type I;IPR003884,Factor I membrane attack complex;IPR006209,EGF-like	Metalloendopeptidases.	KOG4475|FOG: Immunoglobin and related proteins|Inorganic ion transport and metabolism |METABOLISM;KOG4475|FOG: Immunoglobin and related proteins|General function prediction only |POORLY CHARACTERIZED	1549|metalloendopeptidase activity|molecular_function|GO:0004222; 1570|stromelysin 3 activity|molecular_function|GO:0004249; 4787|collagenase activity|molecular_function|GO:0008133; 4961|prenyl protein specific endopeptidase activity|molecular_function|GO:0008319;11210|matrilysin-2 activity|molecular_function|GO:0030402	-
XTROP0001S00032116	295244	ENSXETG00000003532	8	liver early down	-2.433				NA	IPR001862,Membrane attack complex component/perforin/complement C9;IPR008085,Thrombospondin, subtype 1;IPR002172,Low density lipoprotein-receptor, class A;IPR000436,Sushi/SCR/CCP;IPR000884,Thrombospondin, type I;IPR003884,Factor I membrane attack complex;IPR006209,EGF-like	Metalloendopeptidases.	KOG4475|FOG: Immunoglobin and related proteins|Inorganic ion transport and metabolism |METABOLISM;KOG4475|FOG: Immunoglobin and related proteins|General function prediction only |POORLY CHARACTERIZED	1549|metalloendopeptidase activity|molecular_function|GO:0004222; 1570|stromelysin 3 activity|molecular_function|GO:0004249; 4787|collagenase activity|molecular_function|GO:0008133; 4961|prenyl protein specific endopeptidase activity|molecular_function|GO:0008319;11210|matrilysin-2 activity|molecular_function|GO:0030402	-
XTROP0001S00024705	297363	ENSXETG00000022396	8	liver early down	-2.023				MGC107895 protein. [Source:UniProtKB/TrEMBL;Acc:Q5EBG2]	IPR004981,Tryptophan 2,3-dioxygenase	Tryptophan 2,3-dioxygenase.	KOG3906|Tryptophan 2,3-dioxygenase|Amino acid transport and metabolism |METABOLISM	2095|tryptophan 2,3-dioxygenase activity|molecular_function|GO:0004833; 3647|tryptophan metabolism|biological_process|GO:0006568	-
XTROP0001S00009326	301001	ENSXETG00000007942	8	liver early down	-1.837				NA	IPR007990,Seminal vesicle autoantigen;IPR002110,Ankyrin;IPR001599,Alpha-2-macroglobulin;IPR002890,Alpha-2-macroglobulin, N-terminal	NA	NA	2127|endopeptidase inhibitor activity|molecular_function|GO:0004866; 2700|extracellular region|cellular_component|GO:0005576	-
XTROP0001S00005541	305484	ENSXETG00000001566	8	liver early down	-1.503				Insulin receptor substrate 4 (IRS-4)(160 kDa phosphotyrosine protein)(PY160) [Source:UniProtKB/Swiss-Prot;Acc:O14654]	IPR002404,Insulin receptor substrate-1, PTB;IPR001849,Pleckstrin-like	NA	NA	NA	-
XTROP0001S00004655	308298	NA	8	liver early down	-2.744				NA	IPR000436,Sushi/SCR/CCP	Protein-glutamine gamma-glutamyltransferase.	NA	NA	-
XTROP0001S00005968	308354	NA	8	liver early down	-1.935				NA	IPR000436,Sushi/SCR/CCP	NA	NA	NA	-
XTROP0001S00009692	308546	ENSXETG00000005261	8	liver early down	-3.21				Complement factor H precursor (H factor 1). [Source:UniProtKB/Swiss-Prot;Acc:P08603] [from human gene ENSG00000000971]	IPR000436,Sushi/SCR/CCP	Protein-glutamine gamma-glutamyltransferase.	KOG4297|C-type lectin|Defense mechanisms |CELLULAR PROCESSES AND SIGNALING;KOG4297|C-type lectin|Signal transduction mechanisms |CELLULAR PROCESSES AND SIGNALING	NA	-
XTROP0001S00019618	308557	NA	8	liver early down	-2.741				NA	IPR000436,Sushi/SCR/CCP	NA	NA	NA	-
XTROP0001S00013098	310119	ENSXETG00000026528	8	liver early down	-1.668				NA	IPR003599,Immunoglobulin subtype;IPR007110,Immunoglobulin-like;IPR003006,Immunoglobulin/major histocompatibility complex	NA	NA	NA	-
XTROP0001S00011020	327877	ENSXETG00000024110	8	liver early down	-2.061				Hypothetical protein mgc107998. [Source:UniProtKB/TrEMBL;Acc:Q4V785]	IPR002172,Low density lipoprotein-receptor, class A;IPR001190,Speract/scavenger receptor;IPR003884,Factor I membrane attack complex;IPR001254,Peptidase S1, chymotrypsin	Complement factor I.	KOG3627|Trypsin|Amino acid transport and metabolism |METABOLISM	2290|scavenger receptor activity|molecular_function|GO:0005044; 7826|membrane|cellular_component|GO:0016020; 1596|trypsin activity|molecular_function|GO:0004295; 3588|proteolysis and peptidolysis|biological_process|GO:0006508; 1164|complement factor I activity|molecular_function|GO:0003818	-
XTROP0001S00010857	330213	NA	8	liver early down	-1.552				NA	IPR000421,Coagulation factor 5/8 type, C-terminal;IPR006585,Fucolectin tachylectin-4 pentraxin-1	NA	NA	4201|cell adhesion|biological_process|GO:0007155	-
XTROP0001S00006936	336037	ENSXETG00000000393	8	liver early down	-1.581				NA	IPR002181,Fibrinogen, beta/gamma chain, C-terminal globular	NA	KOG2579|Ficolin and related extracellular proteins|General function prediction only |POORLY CHARACTERIZED	NA	-
XTROP0001S00017124	336070	NA	8	liver early down	-2.023				NA	IPR008161,Collagen helix repeat;IPR002181,Fibrinogen, beta/gamma chain, C-terminal globular;IPR008160,Collagen triple helix repeat	NA	KOG2579|Ficolin and related extracellular proteins|General function prediction only |POORLY CHARACTERIZED	2855|cytoplasm|cellular_component|GO:0005737; 3886|phosphate transport|biological_process|GO:0006817	-
XTROP0001S00016250	342427	ENSXETG00000018647	8	liver early down	-2.044				MGC89221 protein. [Source:UniProtKB/TrEMBL;Acc:Q6DIU1]	IPR001916,Glycoside hydrolase, family 22	NA	NA	2700|extracellular region|cellular_component|GO:0005576	-
XTROP0001S00031148	353676	NA	3	liver early down	-2.068				NA	IPR001079,Galectin, galactose-binding lectin	NA	KOG3587|Galectin, galactose-binding lectin|Extracellular structures |CELLULAR PROCESSES AND SIGNALING	NA	-
XTROP0001S00009766	357958	ENSXETG00000015830	8	liver early down	-2.013				Hypothetical protein MGC75694. [Source:UniProtKB/TrEMBL;Acc:Q6P8G5]	NA	NA	KOG1651|Glutathione peroxidase|Posttranslational modification, protein turnover, chaperones |CELLULAR PROCESSES AND SIGNALING	NA	-
XTROP0001S00011136	358012	ENSXETG00000027977	8	liver early down	-1.937				NA	NA	NA	NA	NA	-
XTROP0001S00000986	368214	NA	8	liver early down	-1.595				NA	IPR000436,Sushi/SCR/CCP	NA	NA	NA	-
XTROP0001S00013834	386086	NA	8	liver early down	-1.978				NA	IPR001134,Netrin, C-terminal	NA	NA	NA	-
XTROP0001S00000253	386165	NA	8	liver early down	-2.143				NA	IPR000020,Anaphylatoxin/fibulin;IPR001840,Complement C3a/C4a/C5a anaphylatoxin;IPR001599,Alpha-2-macroglobulin;IPR001134,Netrin, C-terminal;IPR002890,Alpha-2-macroglobulin, N-terminal;NULL,NULL	NA	KOG1366|Alpha-macroglobulin|Posttranslational modification, protein turnover, chaperones |CELLULAR PROCESSES AND SIGNALING	NA	-
XTROP0001S00020910	397312	NA	8	liver early down	-1.569				NA	IPR000020,Anaphylatoxin/fibulin;IPR001840,Complement C3a/C4a/C5a anaphylatoxin;IPR001599,Alpha-2-macroglobulin;IPR002890,Alpha-2-macroglobulin, N-terminal;NULL,NULL;IPR010916,TonB box, N-terminal	NA	KOG1366|Alpha-macroglobulin|Posttranslational modification, protein turnover, chaperones |CELLULAR PROCESSES AND SIGNALING	2700|extracellular region|cellular_component|GO:0005576; 2127|endopeptidase inhibitor activity|molecular_function|GO:0004866; 4009|inflammatory response|biological_process|GO:0006954; 4011|complement activation|biological_process|GO:0006956	-
XTROP0001S00003778	400118	NA	8	liver early down	-1.938				NA	IPR007990,Seminal vesicle autoantigen;IPR001599,Alpha-2-macroglobulin;IPR002890,Alpha-2-macroglobulin, N-terminal	NA	KOG1366|Alpha-macroglobulin|Posttranslational modification, protein turnover, chaperones |CELLULAR PROCESSES AND SIGNALING	2127|endopeptidase inhibitor activity|molecular_function|GO:0004866; 2700|extracellular region|cellular_component|GO:0005576	-
XTROP0001S00026567	420558	ENSXETG00000010935	8	liver early down	-2.449				Complement factor B Precursor (EC 3.4.21.47)(C3/C5 convertase)(Properdin factor B)(Glycine-rich beta glycoprotein)(GBG)(PBF2) [Contains Complement factor B Ba fragment;Complement factor B Bb fragment] [Source:UniProtKB/Swiss-Prot;Acc:P00751]	IPR002035,von Willebrand factor, type A;IPR001314,Peptidase S1A, chymotrypsin;IPR000436,Sushi/SCR/CCP;IPR001254,Peptidase S1, chymotrypsin	Alternative-complement pathway C3/C5 convertase.	NA	NA	-
XTROP0001S00061345	426472	ENSXETG00000017070	3	liver early down	-1.718				NA	IPR007990,Seminal vesicle autoantigen;IPR001599,Alpha-2-macroglobulin;IPR002890,Alpha-2-macroglobulin, N-terminal	NA	KOG1366|Alpha-macroglobulin|Posttranslational modification, protein turnover, chaperones |CELLULAR PROCESSES AND SIGNALING	NA	-
XTROP0001S00024582	438774	NA	8	liver early down	-2.392				NA	IPR000436,Sushi/SCR/CCP	NA	NA	NA	-
XTROP0001S00012792	441817	ENSXETG00000024219	8	liver early down	-2.133				LOC619586 protein (Fragment). [Source:UniProtKB/TrEMBL;Acc:Q566M0]	NA	NA	NA	NA	-
XTROP0001S00024070	445723	NA	8	liver early down	-2.778				NA	IPR000436,Sushi/SCR/CCP	NA	NA	NA	-
XTROP0001S00004356	455890	NA	8	liver early down	-2.146				NA	NA	NA	NA	NA	-
XTROP0001S00020832	456043	ENSXETG00000021959	8	liver early down	-1.914				NA	IPR003439,ABC transporter;IPR003593,AAA ATPase;IPR001687,ATP/GTP-binding site motif A (P-loop);IPR001969,Peptidase aspartic, active site	NA	KOG0059|Lipid exporter ABCA1 and related proteins, ABC superfamily|Lipid transport and metabolism |METABOLISM;KOG0059|Lipid exporter ABCA1 and related proteins, ABC superfamily|General function prediction only |POORLY CHARACTERIZED	NA	-
XTROP0001S00009962	471107	ENSXETG00000005203	3	liver early down	-1.748				Complement C4-B precursor (Basic complement C4) [Contains: Complement C4 beta chain; Complement C4-B alpha chain; C4a anaphylatoxin; C4b-B; C4d-B; Complement C4 gamma chain]. [Source:UniProtKB/Swiss-Prot;Acc:P0C0L5] [from human gene ENSG00000198209]	IPR000020,Anaphylatoxin/fibulin;IPR001599,Alpha-2-macroglobulin;IPR001134,Netrin, C-terminal;IPR002890,Alpha-2-macroglobulin, N-terminal	NA	NA	NA	-
XTROP0001S00058076	471107	ENSXETG00000005203	8	liver early down	-1.758				Complement C4-B precursor (Basic complement C4) [Contains: Complement C4 beta chain; Complement C4-B alpha chain; C4a anaphylatoxin; C4b-B; C4d-B; Complement C4 gamma chain]. [Source:UniProtKB/Swiss-Prot;Acc:P0C0L5] [from human gene ENSG00000198209]	IPR000020,Anaphylatoxin/fibulin;IPR001599,Alpha-2-macroglobulin;IPR001134,Netrin, C-terminal;IPR002890,Alpha-2-macroglobulin, N-terminal	NA	NA	NA	-
XTROP0001S00014856	474248	ENSXETG00000006980	8	liver early down	-1.77				Mug1 protein (Fragment). [Source:UniProtKB/TrEMBL;Acc:Q5BIY8]	IPR001599,Alpha-2-macroglobulin	NA	KOG1366|Alpha-macroglobulin|Posttranslational modification, protein turnover, chaperones |CELLULAR PROCESSES AND SIGNALING	2127|endopeptidase inhibitor activity|molecular_function|GO:0004866	-
XTROP0001S00002041	477452	ENSXETG00000003134	8	liver early down	-1.965				Ectonucleotide pyrophosphatase/phosphodiesterase family member 2 Precursor (E-NPP 2)(EC 3.1.4.39)(Extracellular lysophospholipase D)(LysoPLD)(Autotaxin) [Source:UniProtKB/Swiss-Prot;Acc:Q13822]	IPR001212,Somatomedin B;IPR001604,DNA/RNA non-specific endonuclease;IPR002591,Type I phosphodiesterase/nucleotide pyrophosphatase	NA	KOG2645|Type I phosphodiesterase/nucleotide pyrophosphatase|General function prediction only |POORLY CHARACTERIZED	1055|nucleic acid binding|molecular_function|GO:0003676; 1805|endonuclease activity|molecular_function|GO:0004519; 5719|nucleotide metabolism|biological_process|GO:0009117; 8516|hydrolase activity|molecular_function|GO:0016787	-
XTROP0001S00066234	NA	ENSXETG00000027213	3	liver early down	-2.972				MGC69493 protein. [Source:UniProtKB/TrEMBL;Acc:Q6GLH1]	NA	NA	NA	NA	-
XTROP0001S00015605	NA	NA	3	liver early down	-1.551				NA	NA	NA	NA	NA	-
XTROP0001S00032800	NA	NA	3	liver early down	-2.015				NA	NA	NA	NA	NA	-
XTROP0001S00032802	NA	NA	3	liver early down	-2.049				NA	NA	NA	NA	NA	-
XTROP0001S00034646	NA	NA	3	liver early down	-1.596				NA	NA	NA	NA	NA	-
XTROP0001S00035719	NA	NA	3	liver early down	-2.848				NA	NA	NA	NA	NA	-
XTROP0001S00038252	NA	NA	3	liver early down	-1.914				NA	NA	NA	NA	NA	-
XTROP0001S00044677	NA	NA	3	liver early down	-2.71				NA	NA	NA	NA	NA	-
XTROP0001S00057252	NA	NA	3	liver early down	-1.788				NA	NA	NA	NA	NA	-
XTROP0001S00061391	NA	NA	3	liver early down	-1.774				NA	NA	NA	NA	NA	-
XTROP0001S00061699	NA	NA	3	liver early down	-1.52				NA	NA	NA	NA	NA	-
XTROP0001S00062823	NA	NA	3	liver early down	-1.891				NA	NA	NA	NA	NA	-
XTROP0001S00063413	NA	NA	3	liver early down	-1.923				NA	NA	NA	NA	NA	-
XTROP0001S00066208	NA	NA	3	liver early down	-2.326				NA	NA	NA	NA	NA	-
XTROP0001S00066209	NA	NA	3	liver early down	-2.31				NA	NA	NA	NA	NA	-
XTROP0001S00066235	NA	NA	3	liver early down	-1.704				NA	NA	NA	NA	NA	-
XTROP0001S00066236	NA	NA	3	liver early down	-2.571				NA	NA	NA	NA	NA	-
XTROP0001S00023086	11895	ENSXETG00000013544	8	liver early down, liver late down	-2.528		-2.285		Alpha-2-antiplasmin Precursor (Alpha-2-AP)(Alpha-2-plasmin inhibitor)(Alpha-2-PI) [Source:UniProtKB/Swiss-Prot;Acc:P08697]	IPR000215,Proteinase inhibitor I4, serpin	NA	NA	2128|serine-type endopeptidase inhibitor activity|molecular_function|GO:0004867	-
XTROP0001S00001001	80741	NA	8	liver early down, liver late down	-1.993		-2.441		NA	IPR000001,Kringle;IPR000562,Type II fibronectin, collagen-binding;IPR001314,Peptidase S1A, chymotrypsin;IPR006209,EGF-like;IPR001254,Peptidase S1, chymotrypsin;IPR000083,Fibronectin, type I;IPR001881,EGF-like calcium-binding;IPR006210,Type I EGF;IPR000742,EGF-like, subtype 2	Serine endopeptidases.	KOG3627|Trypsin|Amino acid transport and metabolism |METABOLISM	2700|extracellular region|cellular_component|GO:0005576; 1596|trypsin activity|molecular_function|GO:0004295; 3588|proteolysis and peptidolysis|biological_process|GO:0006508; 1579|chymotrypsin activity|molecular_function|GO:0004263; 2641|calcium ion binding|molecular_function|GO:0005509; 1573|serine-type endopeptidase activity|molecular_function|GO:0004252; 1591|subtilase activity|molecular_funct…	-
XTROP0001S00020283	110072	ENSXETG00000024227	3	liver early down, liver late down	-1.97		-1.603		NA	IPR001599,Alpha-2-macroglobulin;IPR002890,Alpha-2-macroglobulin, N-terminal	NA	KOG1366|Alpha-macroglobulin|Posttranslational modification, protein turnover, chaperones |CELLULAR PROCESSES AND SIGNALING	2127|endopeptidase inhibitor activity|molecular_function|GO:0004866	-
XTROP0001S00033272	110072	ENSXETG00000024227	8	liver early down, liver late down	-1.912		-1.511		NA	IPR001599,Alpha-2-macroglobulin;IPR002890,Alpha-2-macroglobulin, N-terminal	NA	KOG1366|Alpha-macroglobulin|Posttranslational modification, protein turnover, chaperones |CELLULAR PROCESSES AND SIGNALING	2127|endopeptidase inhibitor activity|molecular_function|GO:0004866	-
XTROP0001S00005608	113474	ENSXETG00000006924	8	liver early down, liver late down	-1.912		-3.185		NA	IPR001128,Cytochrome P450;IPR002401,E-class P450, group I;IPR008069,E-class P450, CYP2D	Unspecific monooxygenase.	KOG0156|Cytochrome P450 CYP2 subfamily|Secondary metabolites biosynthesis, transport and catabolism |METABOLISM	3218|electron transport|biological_process|GO:0006118; 1783|monooxygenase activity|molecular_function|GO:0004497; 8444|oxidoreductase activity, acting on paired donors, with incorporation or reduction of molecular oxygen, reduced flavin or flavoprotein as one donor, and incorporation of one atom of oxygen|molecular_function|GO:0016712;17878|unspecific monooxygenase activity|molecular_function|GO:…	-
XTROP0001S00013057	147782	ENSXETG00000008249	8	liver early down, liver late down	-1.631		-1.727		Retinol-binding protein 1 (Cellular retinol-binding protein I)(CRBP-I)(Cellular retinol-binding protein)(CRBP) [Source:UniProtKB/Swiss-Prot;Acc:P09455]	IPR000463,Cytosolic fatty-acid binding protein;IPR000566,Lipocalin-related protein and Bos/Can/Equ allergen	NA	NA	NA	-
XTROP0001S00034520	150185	ENSXETG00000023156	3	liver early down, liver late down	-1.925		-1.348		LOC613045 protein (Fragment). [Source:UniProtKB/TrEMBL;Acc:Q501L2]	IPR006662,Thioredoxin-related;IPR006863,Erv1/Alr;IPR006663,Thioredoxin domain 2	Protein disulfide isomerase.	KOG1731|FAD-dependent sulfhydryl oxidase/quiescin and related proteins|Cell cycle control, cell division, chromosome partitioning |METABOLISM	2626|electron transporter activity|molecular_function|GO:0005489; 3218|electron transport|biological_process|GO:0006118; 1114|protein disulfide isomerase activity|molecular_function|GO:0003756	-
XTROP0001S00001632	152183	NA	8	liver early down, liver late down	-2.095		-3.733		NA	IPR003234,Molluscan insulin-related peptide;IPR004825,Insulin/IGF/relaxin	NA	NA	2418|hormone activity|molecular_function|GO:0005179; 2700|extracellular region|cellular_component|GO:0005576; 4610|physiological process|biological_process|GO:0007582	-
XTROP0001S00006434	152367	NA	8	liver early down, liver late down	-1.507		-2.54		NA	IPR000264,Serum albumin;IPR000213,Vitamin D-binding protein	Forming carbon-carbon bonds.	NA	2582|carrier activity|molecular_function|GO:0005386; 2739|extracellular space|cellular_component|GO:0005615; 3879|transport|biological_process|GO:0006810; 8612|ligase activity, forming carbon-carbon bonds|molecular_function|GO:0016885	-
XTROP0001S00020841	152545	ENSXETG00000019324	8	liver early down, liver late down	-1.568		-1.684		Lutheran blood group glycoprotein Precursor (B-CAM cell surface glycoprotein)(Auberger B antigen)(F8/G253 antigen)(CD239 antigen) [Source:UniProtKB/Swiss-Prot;Acc:P50895]	IPR009134,Vascular endothelial growth factor receptor, VEGFR;IPR007110,Immunoglobulin-like;IPR003598,Immunoglobulin C2 type;IPR003599,Immunoglobulin subtype;IPR006162,Phosphopantetheine attachment site	NA	NA	11963|phosphopantetheine binding|molecular_function|GO:0031177; 2272|vascular endothelial growth factor receptor activity|molecular_function|GO:0005021; 2653|ATP binding|molecular_function|GO:0005524; 3551|protein amino acid phosphorylation|biological_process|GO:0006468	-
XTROP0001S00009630	153006	ENSXETG00000027213	3	liver early down, liver late down	-2.286		-0.873		MGC69493 protein. [Source:UniProtKB/TrEMBL;Acc:Q6GLH1]	IPR000010,Proteinase inhibitor I25, cystatin	NA	NA	2130|cysteine protease inhibitor activity|molecular_function|GO:0004869	-
XTROP0001S00061217	153006	NA	8	liver early down, liver late down	-2.721		-1.15		NA	IPR000010,Proteinase inhibitor I25, cystatin	NA	NA	2130|cysteine protease inhibitor activity|molecular_function|GO:0004869	-
XTROP0001S00023327	153190	ENSXETG00000026722	8	liver early down, liver late down	-1.322		-1.938		Alpha 1 microglobulin/bikunin. [Source:UniProtKB/TrEMBL;Acc:Q6P2V8]	IPR002223,Protease inhibitor I2, Kunitz metazoa;IPR002345,Lipocalin;IPR002968,Alpha-1-microglobulin;IPR000566,Lipocalin-related protein and Bos/Can/Equ allergen	NA	KOG4295|Serine proteinase inhibitor (KU family)|Posttranslational modification, protein turnover, chaperones |CELLULAR PROCESSES AND SIGNALING	2450|transporter activity|molecular_function|GO:0005215; 3879|transport|biological_process|GO:0006810; 2128|serine-type endopeptidase inhibitor activity|molecular_function|GO:0004867	-
XTROP0001S00014304	153542	ENSXETG00000026030	8	liver early down, liver late down	-2.113		-3.414		NA	IPR000940,Methyltransferase, NNMT/PNMT/TEMT;IPR001601,Generic methyltransferase	NA	NA	4820|methyltransferase activity|molecular_function|GO:0008168	-
XTROP0001S00022716	153638	ENSXETG00000003259	8	liver early down, liver late down	-2.024		-2.97		NA	IPR004269,Folate receptor	NA	NA	NA	-
XTROP0001S00000875	160064	ENSXETG00000005052	3	liver early down, liver late down	-1.659		-1.77		Hypothetical protein LOC496770. [Source:UniProtKB/TrEMBL;Acc:Q5M8F9]	NA	NA	NA	NA	-
XTROP0001S00033618	160064	ENSXETG00000005052	8	liver early down, liver late down	-1.408		-1.253		Hypothetical protein LOC496770. [Source:UniProtKB/TrEMBL;Acc:Q5M8F9]	NA	NA	NA	NA	-
XTROP0001S00008200	178427	ENSXETG00000014020	8	liver early down, liver late down	-1.458		-2.416		NA	IPR004825,Insulin/IGF/relaxin	NA	NA	NA	-
XTROP0001S00022887	189624	ENSXETG00000028047	8	liver early down, liver late down	-2.622		-3.789		LOC548368 protein (Fragment). [Source:UniProtKB/TrEMBL;Acc:Q5FWR6]	NA	NA	NA	NA	-
XTROP0001S00003983	278527	ENSXETG00000003731	3	liver early down, liver late down	-2.053		-1.353		MGC107934 protein. [Source:UniProtKB/TrEMBL;Acc:Q5EBG1]	IPR002449,Retinol-binding protein;IPR000566,Lipocalin-related protein and Bos/Can/Equ allergen	NA	NA	2450|transporter activity|molecular_function|GO:0005215; 3879|transport|biological_process|GO:0006810; 2633|retinoid binding|molecular_function|GO:0005501	-
XTROP0001S00061755	278527	ENSXETG00000003731	8	liver early down, liver late down	-1.92		-1.39		MGC107934 protein. [Source:UniProtKB/TrEMBL;Acc:Q5EBG1]	IPR002449,Retinol-binding protein;IPR000566,Lipocalin-related protein and Bos/Can/Equ allergen	NA	NA	2450|transporter activity|molecular_function|GO:0005215; 3879|transport|biological_process|GO:0006810; 2633|retinoid binding|molecular_function|GO:0005501	-
XTROP0001S00002784	283976	NA	3	liver early down, liver late down	-1.796		-1.72		NA	IPR000175,Sodium:neurotransmitter symporter	NA	NA	2536|neurotransmitter:sodium symporter activity|molecular_function|GO:0005328; 2992|integral to plasma membrane|cellular_component|GO:0005887; 3902|neurotransmitter transport|biological_process|GO:0006836; 7826|membrane|cellular_component|GO:0016020	-
XTROP0001S00004231	289752	ENSXETG00000028047	8	liver early down, liver late down	-2.349		-3.451		LOC548368 protein (Fragment). [Source:UniProtKB/TrEMBL;Acc:Q5FWR6]	IPR000940,Methyltransferase, NNMT/PNMT/TEMT;IPR001601,Generic methyltransferase	Nicotinamide N-methyltransferase.	NA	4820|methyltransferase activity|molecular_function|GO:0008168; 4768|nicotinamide N-methyltransferase activity|molecular_function|GO:0008112	-
XTROP0001S00008158	292386	ENSXETG00000023143	3	liver early down, liver late down	-1.723		-2.924		Hypothetical LOC496662. [Source:UniProtKB/TrEMBL;Acc:Q5M8X7]	NA	NA	NA	NA	-
XTROP0001S00027523	293021	ENSXETG00000011164	3	liver early down, liver late down	-1.844		-2.994		MGC107857 protein. [Source:UniProtKB/TrEMBL;Acc:Q5BKM0]	IPR002085,Zinc-containing alcohol dehydrogenase superfamily;IPR002328,Zinc-containing alcohol dehydrogenase;IPR000923,Blue (type 1) copper domain	Alcohol dehydrogenase.	NA	NA	-
XTROP0001S00031978	293021	ENSXETG00000011164	3	liver early down, liver late down	-1.898		-3.299		MGC107857 protein. [Source:UniProtKB/TrEMBL;Acc:Q5BKM0]	IPR002085,Zinc-containing alcohol dehydrogenase superfamily;IPR002328,Zinc-containing alcohol dehydrogenase;IPR000923,Blue (type 1) copper domain	Alcohol dehydrogenase.	NA	NA	-
XTROP0001S00019968	293310	ENSXETG00000013018	3	liver early down, liver late down	-1.69		-3.036		N-acetylmuramoyl-L-alanine amidase Precursor (EC 3.5.1.28)(Peptidoglycan recognition protein long)(PGRP-L)(Peptidoglycan recognition protein 2) [Source:UniProtKB/Swiss-Prot;Acc:Q96PD5]	IPR002502,N-acetylmuramoyl-L-alanine amidase, family 2;IPR006619,Animal peptidoglycan recognition protein PGRP	NA	NA	NA	-
XTROP0001S00025863	293803	ENSXETG00000002964	3	liver early down, liver late down	-1.638		-1.65		MGC107972 protein. [Source:UniProtKB/TrEMBL;Acc:Q5FVZ2]	IPR002383,Coagulation factor, Gla region;IPR001314,Peptidase S1A, chymotrypsin;IPR006209,EGF-like;IPR001254,Peptidase S1, chymotrypsin;IPR000294,Vitamin K-dependent carboxylation/gamma-carboxyglutamic region;IPR001881,EGF-like calcium-binding;IPR006210,Type I EGF;NULL,NULL;IPR000152,Aspartic acid and asparagine hydroxylation site	Protein C (activated).	KOG3627|Trypsin|Amino acid transport and metabolism |METABOLISM	NA	-
XTROP0001S00025966	295773	ENSXETG00000026681	8	liver early down, liver late down	-1.546		-3.897		LOC394903 protein (Fragment). [Source:UniProtKB/TrEMBL;Acc:Q6P336]	IPR002933,Peptidase M20	Aminoacylase.	NA	3588|proteolysis and peptidolysis|biological_process|GO:0006508; 4883|metallopeptidase activity|molecular_function|GO:0008237; 1377|aminoacylase activity|molecular_function|GO:0004046	-
XTROP0001S00061536	297805	ENSXETG00000005868	3	liver early down, liver late down	-1.695		-1.399		cytochrome P450, family 4, subfamily V, polypeptide 2 (CYP4V2), mRNA [Source:RefSeq_dna;Acc:NM_207352] [from human gene ENSG00000145476]	IPR001128,Cytochrome P450;IPR002401,E-class P450, group I	NA	NA	3218|electron transport|biological_process|GO:0006118; 1783|monooxygenase activity|molecular_function|GO:0004497	-
XTROP0001S00022058	297805	ENSXETG00000027605	8	liver early down, liver late down	-1.519		-1.34		cytochrome P450, family 4, subfamily V, polypeptide 2 (CYP4V2), mRNA [Source:RefSeq_dna;Acc:NM_207352] [from human gene ENSG00000145476]	IPR001128,Cytochrome P450;IPR002401,E-class P450, group I	NA	NA	3218|electron transport|biological_process|GO:0006118; 1783|monooxygenase activity|molecular_function|GO:0004497	-
XTROP0001S00011358	300751	ENSXETG00000012652	8	liver early down, liver late down	-1.639		-1.954		Nicotinamide N-methyltransferase (EC 2.1.1.1). [Source:UniProtKB/Swiss-Prot;Acc:P40261] [from human gene ENSG00000166741]	IPR000940,Methyltransferase, NNMT/PNMT/TEMT;IPR001601,Generic methyltransferase	Nicotinamide N-methyltransferase.	NA	4820|methyltransferase activity|molecular_function|GO:0008168; 4768|nicotinamide N-methyltransferase activity|molecular_function|GO:0008112	-
XTROP0001S00026824	303024	ENSXETG00000009215	3	liver early down, liver late down	-1.702		-2.262		Leucine-rich repeat-containing protein 31 [Source:UniProtKB/Swiss-Prot;Acc:Q6UY01]	IPR001611,Leucine-rich repeat;NULL,NULL;IPR003590,Leucine-rich repeat, ribonuclease inhibitor subtype;IPR007091,Leucine-rich repeat, ribonuclease inhibitor type	NA	KOG4308|LRR-containing protein|Function unknown |POORLY CHARACTERIZED	NA	-
XTROP0001S00005022	318650	ENSXETG00000010316	8	liver early down, liver late down	-1.422		-1.668		Protein Z-dependent protease inhibitor Precursor (PZ-dependent protease inhibitor)(PZI)(Serpin A10) [Source:UniProtKB/Swiss-Prot;Acc:Q9UK55]	IPR000215,Proteinase inhibitor I4, serpin;NULL,NULL	NA	KOG2392|Serpin|Defense mechanisms |CELLULAR PROCESSES AND SIGNALING	NA	-
XTROP0001S00016623	325065	ENSXETG00000013846	3	liver early down, liver late down	-1.435		-2.679		Cytochrome P450 27, mitochondrial precursor (EC 1.14.-.-) (Cytochrome P-450C27/25) (Sterol 26-hydroxylase) (Sterol 27-hydroxylase) (Vitamin D(3) 25-hydroxylase) (5-beta-cholestane-3-alpha,7-alpha,12-alpha-triol 27-hydroxylase). [Source:UniProtKB/Swiss-Prot;Acc:Q02318] [from human gene ENSG00000135929]	IPR001128,Cytochrome P450;IPR002401,E-class P450, group I	Cholestanetriol 26-monooxygenase.	NA	NA	-
XTROP0001S00042240	325065	ENSXETG00000013846	8	liver early down, liver late down	-1.72		-2.766		Cytochrome P450 27, mitochondrial precursor (EC 1.14.-.-) (Cytochrome P-450C27/25) (Sterol 26-hydroxylase) (Sterol 27-hydroxylase) (Vitamin D(3) 25-hydroxylase) (5-beta-cholestane-3-alpha,7-alpha,12-alpha-triol 27-hydroxylase). [Source:UniProtKB/Swiss-Prot;Acc:Q02318] [from human gene ENSG00000135929]	IPR001128,Cytochrome P450;IPR002401,E-class P450, group I	Cholestanetriol 26-monooxygenase.	NA	NA	-
XTROP0001S00012650	336998	ENSXETG00000007789	3	liver early down, liver late down	-2.152		-1.383		4-hydroxyphenylpyruvate dioxygenase (EC 1.13.11.27) (4HPPD) (HPD) (HPPDase). [Source:UniProtKB/Swiss-Prot;Acc:Q5BKL0]	IPR004360,Glyoxalase/bleomycin resistance protein/dioxygenase;IPR005956,4-hydroxyphenylpyruvate dioxygenase	4-hydroxyphenylpyruvate dioxygenase.	NA	1214|4-hydroxyphenylpyruvate dioxygenase activity|molecular_function|GO:0003868; 5674|aromatic amino acid family metabolism|biological_process|GO:0009072	-
XTROP0001S00063172	336998	ENSXETG00000007789	8	liver early down, liver late down	-2.452		-1.491		4-hydroxyphenylpyruvate dioxygenase (EC 1.13.11.27) (4HPPD) (HPD) (HPPDase). [Source:UniProtKB/Swiss-Prot;Acc:Q5BKL0]	IPR004360,Glyoxalase/bleomycin resistance protein/dioxygenase;IPR005956,4-hydroxyphenylpyruvate dioxygenase	4-hydroxyphenylpyruvate dioxygenase.	NA	1214|4-hydroxyphenylpyruvate dioxygenase activity|molecular_function|GO:0003868; 5674|aromatic amino acid family metabolism|biological_process|GO:0009072	-
XTROP0001S00015330	341521	ENSXETG00000002769	8	liver early down, liver late down	-2.774		-4.145		NA	IPR006585,Fucolectin tachylectin-4 pentraxin-1;IPR000421,Coagulation factor 5/8 type, C-terminal	NA	NA	4201|cell adhesion|biological_process|GO:0007155	-
XTROP0001S00001556	341530	ENSXETG00000002769	8	liver early down, liver late down	-2.165		-3.704		NA	IPR001759,Pentaxin;IPR000421,Coagulation factor 5/8 type, C-terminal;IPR006585,Fucolectin tachylectin-4 pentraxin-1	NA	NA	4201|cell adhesion|biological_process|GO:0007155	-
XTROP0001S00018614	341561	ENSXETG00000002769	8	liver early down, liver late down	-2.748		-3.848		NA	IPR000421,Coagulation factor 5/8 type, C-terminal;IPR006585,Fucolectin tachylectin-4 pentraxin-1	NA	NA	4201|cell adhesion|biological_process|GO:0007155	-
XTROP0001S00000338	398826	ENSXETG00000022654	3	liver early down, liver late down	-1.85		-1.953		Epoxide hydrolase 1 (EC 3.3.2.9)(Microsomal epoxide hydrolase)(Epoxide hydratase) [Source:UniProtKB/Swiss-Prot;Acc:P07099]	IPR000639,Epoxide hydrolase;IPR000073,Alpha/beta hydrolase fold;IPR010497,Epoxide hydrolase, N-terminal;IPR000379,Esterase/lipase/thioesterase	Epoxide hydrolase.	KOG2565|Predicted hydrolases or acyltransferases (alpha/beta hydrolase superfamily)|General function prediction only |POORLY CHARACTERIZED	1170|catalytic activity|molecular_function|GO:0003824; 1600|epoxide hydrolase activity|molecular_function|GO:0004301; 2907|microsome|cellular_component|GO:0005792; 6221|response to toxin|biological_process|GO:0009636; 7826|membrane|cellular_component|GO:0016020	-
XTROP0001S00015909	399987	ENSXETG00000027636	8	liver early down, liver late down	-1.537		-1.638		LOC613057 protein (Fragment). [Source:UniProtKB/TrEMBL;Acc:Q4VA71]	IPR001314,Peptidase S1A, chymotrypsin;IPR000436,Sushi/SCR/CCP;IPR001254,Peptidase S1, chymotrypsin;IPR000859,CUB	Complement component C1r.	KOG3627|Trypsin|Amino acid transport and metabolism |METABOLISM	1596|trypsin activity|molecular_function|GO:0004295; 3588|proteolysis and peptidolysis|biological_process|GO:0006508; 1579|chymotrypsin activity|molecular_function|GO:0004263; 1161|complement component C1r activity|molecular_function|GO:0003815	-
XTROP0001S00003366	406657	ENSXETG00000026817	8	liver early down, liver late down	-1.887		-2.558		NA	IPR004841,Amino acid permease-associated region;IPR002293,Amino acid/polyamine transporter I	NA	NA	2494|amino acid-polyamine transporter activity|molecular_function|GO:0005279; 3929|amino acid transport|biological_process|GO:0006865; 7826|membrane|cellular_component|GO:0016020; 3879|transport|biological_process|GO:0006810	-
XTROP0001S00012142	406673	NA	8	liver early down, liver late down	-1.687		-2.532		NA	IPR002293,Amino acid/polyamine transporter I	NA	NA	2494|amino acid-polyamine transporter activity|molecular_function|GO:0005279; 3929|amino acid transport|biological_process|GO:0006865; 7826|membrane|cellular_component|GO:0016020	-
XTROP0001S00018974	408403	ENSXETG00000027890	8	liver early down, liver late down	-1.495		-2.292		NA	IPR002035,von Willebrand factor, type A;IPR006587,Vault protein inter-alpha-trypsin	NA	NA	NA	-
XTROP0001S00000156	410480	NA	8	liver early down, liver late down	-2.728		-1.244		NA	IPR000010,Proteinase inhibitor I25, cystatin	NA	NA	NA	-
XTROP0001S00027490	410482	ENSXETG00000027213	8	liver early down, liver late down	-2.541		-1.128		MGC69493 protein. [Source:UniProtKB/TrEMBL;Acc:Q6GLH1]	IPR000010,Proteinase inhibitor I25, cystatin	NA	NA	NA	-
XTROP0001S00021903	419495	ENSXETG00000028051	8	liver early down, liver late down	-1.719		-2.335		NA	IPR000940,Methyltransferase, NNMT/PNMT/TEMT;IPR001601,Generic methyltransferase	Nicotinamide N-methyltransferase.	NA	NA	-
XTROP0001S00015116	419929	ENSXETG00000024216	8	liver early down, liver late down	-2.615		-1.424		NA	NA	NA	NA	NA	-
XTROP0001S00003091	448177	ENSXETG00000016349	8	liver early down, liver late down	-1.797		-3.199		Cytochrome P450 4B1 (EC 1.14.14.1) (CYPIVB1) (P450-HP). [Source:UniProtKB/Swiss-Prot;Acc:P13584] [from human gene ENSG00000142973]	IPR001128,Cytochrome P450;IPR002401,E-class P450, group I	Unspecific monooxygenase.	NA	NA	-
XTROP0001S00021718	448775	NA	3	liver early down, liver late down	-1.593		-2.318		NA	IPR002035,von Willebrand factor, type A;IPR010600,Inter-alpha-trypsin inhibitor heavy chain, C-terminal;IPR006587,Vault protein inter-alpha-trypsin	NA	KOG2353|L-type voltage-dependent Ca2+ channel, alpha2/delta subunit|Signal transduction mechanisms |CELLULAR PROCESSES AND SIGNALING;KOG2353|L-type voltage-dependent Ca2+ channel, alpha2/delta subunit|Inorganic ion transport and metabolism |METABOLISM	NA	-
XTROP0001S00006089	451436	ENSXETG00000014875	8	liver early down, liver late down	-1.402		-1.6		Histamine N-methyltransferase (HMT)(EC 2.1.1.8) [Source:UniProtKB/Swiss-Prot;Acc:P50135]	IPR002114,HPr serine phosphorylation site	Histamine N-methyltransferase.	NA	2553|sugar porter activity|molecular_function|GO:0005351; 5991|phosphoenolpyruvate-dependent sugar phosphotransferase system|biological_process|GO:0009401;15541|histamine N-methyltransferase activity|molecular_function|GO:0046539	-
XTROP0001S00015603	452534	ENSXETG00000009313	8	liver early down, liver late down	-2.364		-3.759		Hypothetical LOC496916. [Source:UniProtKB/TrEMBL;Acc:Q5I0R0]	IPR002085,Zinc-containing alcohol dehydrogenase superfamily;IPR002328,Zinc-containing alcohol dehydrogenase	Alcohol dehydrogenase.	KOG0022|Alcohol dehydrogenase, class III|Secondary metabolites biosynthesis, transport and catabolism |METABOLISM	4913|zinc ion binding|molecular_function|GO:0008270; 8235|oxidoreductase activity|molecular_function|GO:0016491; 1354|alcohol dehydrogenase activity|molecular_function|GO:0004022; 1355|alcohol dehydrogenase activity, metal ion-independent|molecular_function|GO:0004023; 1356|alcohol dehydrogenase activity, zinc-dependent|molecular_function|GO:0004024; 1357|alcohol dehydrogenase activity, iron-depe…	-
XTROP0001S00014637	453885	ENSXETG00000000104	3	liver early down, liver late down	-1.664		-1.793		LOC496642 protein (Fragment). [Source:UniProtKB/TrEMBL;Acc:Q5M8Z9]	NA	In linear amides.	KOG0806|Carbon-nitrogen hydrolase|Amino acid transport and metabolism |METABOLISM	1696|histone deacetylase activity|molecular_function|GO:0004407; 5056|protein N-terminal asparagine amidohydrolase activity|molecular_function|GO:0008418; 5369|UDP-3-O-[3-hydroxymyristoyl] N-acetylglucosamine deacetylase activity|molecular_function|GO:0008759; 5620|succinylglutamate desuccinylase activity|molecular_function|GO:0009017; 8538|hydrolase activity, acting on carbon-nitrogen (but not p…	-
XTROP0001S00033525	453885	NA	8	liver early down, liver late down	-1.55		-1.474		NA	NA	In linear amides.	KOG0806|Carbon-nitrogen hydrolase|Amino acid transport and metabolism |METABOLISM	1696|histone deacetylase activity|molecular_function|GO:0004407; 5056|protein N-terminal asparagine amidohydrolase activity|molecular_function|GO:0008418; 5369|UDP-3-O-[3-hydroxymyristoyl] N-acetylglucosamine deacetylase activity|molecular_function|GO:0008759; 5620|succinylglutamate desuccinylase activity|molecular_function|GO:0009017; 8538|hydrolase activity, acting on carbon-nitrogen (but not p…	-
XTROP0001S00003210	454479	ENSXETG00000011902	8	liver early down, liver late down	-1.56		-2.727		Carbonic anhydrase 6 Precursor (EC 4.2.1.1)(Carbonic anhydrase VI)(CA-VI)(Carbonate dehydratase VI)(Secreted carbonic anhydrase)(Salivary carbonic anhydrase) [Source:UniProtKB/Swiss-Prot;Acc:P23280]	IPR001148,Carbonic anhydrase, eukaryotic;IPR001759,Pentaxin	NA	KOG0382|Carbonic anhydrase|General function prediction only |POORLY CHARACTERIZED	NA	-
XTROP0001S00021149	456292	NA	3	liver early down, liver late down	-2.26		-1.9		NA	IPR003961,Fibronectin, type III	NA	NA	NA	-
XTROP0001S00061107	456292	NA	3	liver early down, liver late down	-2.663		-2.08		NA	IPR003961,Fibronectin, type III	NA	NA	NA	-
XTROP0001S00061109	456292	NA	8	liver early down, liver late down	-2.632		-1.967		NA	IPR003961,Fibronectin, type III	NA	NA	NA	-
XTROP0001S00003559	456300	ENSXETG00000019389	3	liver early down, liver late down	-2.191		-3.741		HRG protein (Hypothetical protein) (Fragment). [Source:UniProtKB/TrEMBL;Acc:Q6DIT5]	IPR000010,Proteinase inhibitor I25, cystatin	NA	NA	NA	-
XTROP0001S00032028	456300	ENSXETG00000019389	8	liver early down, liver late down	-2.388		-3.859		HRG protein (Hypothetical protein) (Fragment). [Source:UniProtKB/TrEMBL;Acc:Q6DIT5]	IPR000010,Proteinase inhibitor I25, cystatin	NA	NA	NA	-
XTROP0001S00013717	456302	NA	8	liver early down, liver late down	-1.834		-1.329		NA	IPR000010,Proteinase inhibitor I25, cystatin;IPR001363,Proteinase inhibitor I25C, fetuin	NA	NA	NA	-
XTROP0001S00005217	459955	ENSXETG00000006979	8	liver early down, liver late down	-2.621		-1.436		NA	IPR001599,Alpha-2-macroglobulin;IPR002890,Alpha-2-macroglobulin, N-terminal	NA	KOG1366|Alpha-macroglobulin|Posttranslational modification, protein turnover, chaperones |CELLULAR PROCESSES AND SIGNALING	2127|endopeptidase inhibitor activity|molecular_function|GO:0004866	-
XTROP0001S00004641	461260	NA	8	liver early down, liver late down	-1.999		-3.034		NA	IPR000940,Methyltransferase, NNMT/PNMT/TEMT;IPR001601,Generic methyltransferase	Nicotinamide N-methyltransferase.	NA	4820|methyltransferase activity|molecular_function|GO:0008168; 4768|nicotinamide N-methyltransferase activity|molecular_function|GO:0008112	-
XTROP0001S00015662	462921	ENSXETG00000018450	3	liver early down, liver late down	-1.914		-1.822		NA	NA	NA	NA	NA	-
XTROP0001S00003894	463650	NA	8	liver early down, liver late down	-2.083		-1.709		NA	IPR007671,Selenoprotein P, N-terminal	NA	NA	NA	-
XTROP0001S00011008	464259	NA	8	liver early down, liver late down	-1.568		-1.896		NA	IPR001128,Cytochrome P450;IPR002401,E-class P450, group I;IPR008069,E-class P450, CYP2D	Unspecific monooxygenase.	NA	NA	-
XTROP0001S00002935	468033	ENSXETG00000005225	8	liver early down, liver late down	-2.023		-2.777		Nicotinamide N-methyltransferase (EC 2.1.1.1). [Source:UniProtKB/Swiss-Prot;Acc:P40261] [from human gene ENSG00000166741]	IPR000940,Methyltransferase, NNMT/PNMT/TEMT;IPR001601,Generic methyltransferase	Nicotinamide N-methyltransferase.	NA	4820|methyltransferase activity|molecular_function|GO:0008168; 4768|nicotinamide N-methyltransferase activity|molecular_function|GO:0008112	-
XTROP0001S00065519	NA	ENSXETG00000024804	3	liver early down, liver late down	-1.824		-1.661		Cytochrome P450 2D6 (EC 1.14.14.1) (CYPIID6) (P450-DB1) (Debrisoquine 4-hydroxylase). [Source:UniProtKB/Swiss-Prot;Acc:P10635] [from human gene ENSG00000100197]	NA	NA	NA	NA	-
XTROP0001S00036800	NA	ENSXETG00000005495	3	liver early down, liver late down	-1.888		-2.338		Hepatocyte growth factor activator Precursor (HGF activator)(HGFA)(EC 3.4.21.-) [Contains Hepatocyte growth factor activator short chain;Hepatocyte growth factor activator long chain] [Source:UniProtKB/Swiss-Prot;Acc:Q04756]	NA	NA	NA	NA	-
XTROP0001S00039355	NA	ENSXETG00000002376	3	liver early down, liver late down	-1.534		-1.977		Hypothetical protein. [Source:UniProtKB/TrEMBL;Acc:Q640T6]	NA	NA	NA	NA	-
XTROP0001S00031578	NA	ENSXETG00000004795	3	liver early down, liver late down	-1.321		-1.731		LOC548369 protein (Fragment). [Source:UniProtKB/TrEMBL;Acc:Q5FW13]	NA	NA	NA	NA	-
XTROP0001S00061316	NA	ENSXETG00000022417	3	liver early down, liver late down	-1.826		-2.269		MGC107849 protein. [Source:UniProtKB/TrEMBL;Acc:Q5FW33]	NA	NA	NA	NA	-
XTROP0001S00033949	NA	ENSXETG00000026797	3	liver early down, liver late down	-1.675		-1.698		NA	NA	NA	NA	NA	-
XTROP0001S00030671	NA	NA	3	liver early down, liver late down	-1.847		-3.128		NA	NA	NA	NA	NA	-
XTROP0001S00037302	NA	NA	3	liver early down, liver late down	-1.785		-2.466		NA	NA	NA	NA	NA	-
XTROP0001S00039876	NA	NA	3	liver early down, liver late down	-1.518		-2.083		NA	NA	NA	NA	NA	-
XTROP0001S00041278	NA	NA	3	liver early down, liver late down	-1.89		-1.762		NA	NA	NA	NA	NA	-
XTROP0001S00044741	NA	NA	3	liver early down, liver late down	-1.748		-3.025		NA	NA	NA	NA	NA	-
XTROP0001S00008963	293450	ENSXETG00000018647	8	liver early down, liver late up	-2.316		1.765		MGC89221 protein. [Source:UniProtKB/TrEMBL;Acc:Q6DIU1]	IPR001916,Glycoside hydrolase, family 22;IPR000974,Glycoside hydrolase, family 22, lysozyme	Lysozyme.	NA	NA	-
XTROP0001S00009023	312547	ENSXETG00000001263	3	liver early down, liver late up	-2.179		2.582		Methionine adenosyltransferase II, alpha. [Source:UniProtKB/TrEMBL;Acc:Q6P1T2]	IPR002133,S-adenosylmethionine synthetase	Methionine adenosyltransferase.	KOG1506|S-adenosylmethionine synthetase|Coenzyme transport and metabolism |METABOLISM	NA	-
XTROP0001S00021988	368224	ENSXETG00000014574	8	liver early down, liver late up	-2.048		2.295		NA	IPR000436,Sushi/SCR/CCP	NA	NA	NA	-
XTROP0001S00014139	368274	ENSXETG00000014574	8	liver early down, liver late up	-2.004		2.124		NA	IPR000436,Sushi/SCR/CCP	NA	NA	NA	-
XTROP0001S00035378	NA	NA	3	liver early down, liver late up	-3.172		2.369		NA	NA	NA	NA	NA	-
XTROP0001S00035379	NA	NA	3	liver early down, liver late up	-3.166		2.255		NA	NA	NA	NA	NA	-
XTROP0001S00026060	12698	NA	8	liver late down			-1.707		NA	IPR001753,Enoyl-CoA hydratase/isomerase	Dodecenoyl-CoA delta-isomerase.	NA	1170|catalytic activity|molecular_function|GO:0003824; 4804|metabolism|biological_process|GO:0008152; 1493|dodecenoyl-CoA delta-isomerase activity|molecular_function|GO:0004165	-
XTROP0001S00009945	21771	ENSXETG00000025632	8	liver late down			-1.589		NA	IPR006862,Acyl-CoA thioester hydrolase/bile acid-CoA amino acid N-acetyltransferase	Glycine N-choloyltransferase.	NA	3707|lipid metabolism|biological_process|GO:0006629; 8080|palmitoyl-CoA hydrolase activity|molecular_function|GO:0016290;16954|glycine N-choloyltransferase activity|molecular_function|GO:0047963	-
XTROP0001S00020775	69235	NA	8	liver late down			-1.196		NA	NA	NA	NA	NA	-
XTROP0001S00012610	78529	NA	8	liver late down			-1.429		NA	IPR002401,E-class P450, group I	NA	KOG0156|Cytochrome P450 CYP2 subfamily|Secondary metabolites biosynthesis, transport and catabolism |METABOLISM	1783|monooxygenase activity|molecular_function|GO:0004497; 3218|electron transport|biological_process|GO:0006118	-
XTROP0001S00016016	79516	NA	8	liver late down			-1.383		NA	NA	NA	NA	NA	-
XTROP0001S00000954	112834	ENSXETG00000025755	8	liver late down			-1.834		NA	IPR002401,E-class P450, group I;IPR001128,Cytochrome P450	Unspecific monooxygenase.	KOG0156|Cytochrome P450 CYP2 subfamily|Secondary metabolites biosynthesis, transport and catabolism |METABOLISM	3218|electron transport|biological_process|GO:0006118; 1783|monooxygenase activity|molecular_function|GO:0004497;17878|unspecific monooxygenase activity|molecular_function|GO:0050381	-
XTROP0001S00006542	126998	ENSXETG00000028064	8	liver late down			-1.216		NA	IPR010497,Epoxide hydrolase, N-terminal	NA	NA	1600|epoxide hydrolase activity|molecular_function|GO:0004301; 2907|microsome|cellular_component|GO:0005792; 6221|response to toxin|biological_process|GO:0009636; 7826|membrane|cellular_component|GO:0016020	-
XTROP0001S00018476	146515	ENSXETG00000023303	8	liver late down			-2.503		Protein unc-93 homolog A (Protein UNC-93A)(HmUNC-93A) [Source:UniProtKB/Swiss-Prot;Acc:Q86WB7]	NA	NA	NA	NA	-
XTROP0001S00022223	146569	NA	3	liver late down			-1.516		NA	IPR003663,Sugar transporter;IPR000803,Facilitated glucose transporter;IPR005828,General substrate transporter;IPR007114,Major facilitator superfamily;IPR005829,Sugar transporter superfamily	L-arabinose isomerase.	NA	2557|glucose transporter activity|molecular_function|GO:0005355; 3879|transport|biological_process|GO:0006810; 7826|membrane|cellular_component|GO:0016020; 2553|sugar porter activity|molecular_function|GO:0005351; 5260|carbohydrate transport|biological_process|GO:0008643; 2450|transporter activity|molecular_function|GO:0005215; 7827|integral to membrane|cellular_component|GO:0016021; 5345|L-arabi…	-
XTROP0001S00031679	146569	NA	3	liver late down			-1.371		NA	IPR003663,Sugar transporter;IPR000803,Facilitated glucose transporter;IPR005828,General substrate transporter;IPR007114,Major facilitator superfamily;IPR005829,Sugar transporter superfamily	L-arabinose isomerase.	NA	2557|glucose transporter activity|molecular_function|GO:0005355; 3879|transport|biological_process|GO:0006810; 7826|membrane|cellular_component|GO:0016020; 2553|sugar porter activity|molecular_function|GO:0005351; 5260|carbohydrate transport|biological_process|GO:0008643; 2450|transporter activity|molecular_function|GO:0005215; 7827|integral to membrane|cellular_component|GO:0016021; 5345|L-arabi…	-
XTROP0001S00031681	146569	NA	8	liver late down			-1.376		NA	IPR003663,Sugar transporter;IPR000803,Facilitated glucose transporter;IPR005828,General substrate transporter;IPR007114,Major facilitator superfamily;IPR005829,Sugar transporter superfamily	L-arabinose isomerase.	NA	2557|glucose transporter activity|molecular_function|GO:0005355; 3879|transport|biological_process|GO:0006810; 7826|membrane|cellular_component|GO:0016020; 2553|sugar porter activity|molecular_function|GO:0005351; 5260|carbohydrate transport|biological_process|GO:0008643; 2450|transporter activity|molecular_function|GO:0005215; 7827|integral to membrane|cellular_component|GO:0016021; 5345|L-arabi…	-
XTROP0001S00032235	146640	ENSXETG00000008635	3	liver late down			-1.062		Afadin- and alpha-actinin-binding protein (ADIP)(Afadin DIL domain-interacting protein)(SSX2-interacting protein) [Source:UniProtKB/Swiss-Prot;Acc:Q9Y2D8]	NA	NA	NA	NA	-
XTROP0001S00018430	147141	ENSXETG00000017309	8	liver late down			-1.074		MGC88956 protein. [Source:UniProtKB/TrEMBL;Acc:Q6DF55]	IPR001611,Leucine-rich repeat;IPR006209,EGF-like;IPR000483,Cysteine-rich flanking region, C-terminal;IPR006210,Type I EGF;IPR003885,Leucine-rich repeat, cysteine-containing type;NULL,NULL;IPR003591,Leucine-rich repeat, typical subtype	NA	NA	NA	-
XTROP0001S00021290	147254	ENSXETG00000003472	3	liver late down			-1.477		Coagulation factor IX (Plasma thromboplastic component, Christmas disease, hemophilia B). [Source:UniProtKB/TrEMBL;Acc:Q5M8Y0]	IPR002383,Coagulation factor, Gla region;IPR001438,Type II EGF-like signature;IPR001314,Peptidase S1A, chymotrypsin;IPR006209,EGF-like;IPR001254,Peptidase S1, chymotrypsin;IPR000294,Vitamin K-dependent carboxylation/gamma-carboxyglutamic region;IPR001881,EGF-like calcium-binding;IPR006210,Type I EGF;IPR000742,EGF-like, subtype 2;NULL,NULL;IPR000152,Aspartic acid and asparagine hydroxylation site	Coagulation factor IXa.	KOG3627|Trypsin|Amino acid transport and metabolism |METABOLISM	2641|calcium ion binding|molecular_function|GO:0005509; 2700|extracellular region|cellular_component|GO:0005576; 1596|trypsin activity|molecular_function|GO:0004295; 3588|proteolysis and peptidolysis|biological_process|GO:0006508; 1579|chymotrypsin activity|molecular_function|GO:0004263; 1150|coagulation factor IXa activity|molecular_function|GO:0003803	-
XTROP0001S00057202	147254	ENSXETG00000003472	8	liver late down			-1.735		Coagulation factor IX (Plasma thromboplastic component, Christmas disease, hemophilia B). [Source:UniProtKB/TrEMBL;Acc:Q5M8Y0]	IPR002383,Coagulation factor, Gla region;IPR001438,Type II EGF-like signature;IPR001314,Peptidase S1A, chymotrypsin;IPR006209,EGF-like;IPR001254,Peptidase S1, chymotrypsin;IPR000294,Vitamin K-dependent carboxylation/gamma-carboxyglutamic region;IPR001881,EGF-like calcium-binding;IPR006210,Type I EGF;IPR000742,EGF-like, subtype 2;NULL,NULL;IPR000152,Aspartic acid and asparagine hydroxylation site	Coagulation factor IXa.	KOG3627|Trypsin|Amino acid transport and metabolism |METABOLISM	2641|calcium ion binding|molecular_function|GO:0005509; 2700|extracellular region|cellular_component|GO:0005576; 1596|trypsin activity|molecular_function|GO:0004295; 3588|proteolysis and peptidolysis|biological_process|GO:0006508; 1579|chymotrypsin activity|molecular_function|GO:0004263; 1150|coagulation factor IXa activity|molecular_function|GO:0003803	-
XTROP0001S00005302	147862	ENSXETG00000025736	8	liver late down			-1.722		MGC69527 protein. [Source:UniProtKB/TrEMBL;Acc:Q6GL62]	IPR001092,Basic helix-loop-helix dimerisation region bHLH;NULL,NULL	NA	NA	NA	-
XTROP0001S00031041	148081	ENSXETG00000013484	3	liver late down			-1.102		Aldehyde dehydrogenase 3 family, member A2. [Source:UniProtKB/TrEMBL;Acc:Q5BKL3]	IPR002086,Aldehyde dehydrogenase	Aldehyde dehydrogenase (NAD+).	NA	NA	-
XTROP0001S00024827	148226	ENSXETG00000003078	3	liver late down			-1.518		NA	NA	NA	NA	NA	-
XTROP0001S00035675	148226	ENSXETG00000003078	8	liver late down			-2.32		NA	NA	NA	NA	NA	-
XTROP0001S00019752	148250	ENSXETG00000001982	8	liver late down			-1.242		MGC108417 protein. [Source:UniProtKB/TrEMBL;Acc:Q5FVW1]	IPR000001,Kringle;IPR002383,Coagulation factor, Gla region;IPR001314,Peptidase S1A, chymotrypsin;IPR003966,Peptidase S1A, prothrombin;IPR001254,Peptidase S1, chymotrypsin;IPR000294,Vitamin K-dependent carboxylation/gamma-carboxyglutamic region	Thrombin.	NA	NA	-
XTROP0001S00013074	148269	ENSXETG00000005655	8	liver late down			-1.275		MGC89296 protein. [Source:UniProtKB/TrEMBL;Acc:Q6DIR1]	IPR002198,Short-chain dehydrogenase/reductase SDR;IPR002347,Glucose/ribitol dehydrogenase	Gluconate 5-dehydrogenase.	NA	NA	-
XTROP0001S00062113	148401	ENSXETG00000001539	3	liver late down			-2.316		Acyl-CoA synthetase long-chain family member 6. [Source:UniProtKB/TrEMBL;Acc:Q6DF45]	IPR000873,AMP-dependent synthetase and ligase	Long-chain-fatty-acid--CoA ligase.	NA	NA	-
XTROP0001S00027716	148401	ENSXETG00000001539	8	liver late down			-2.35		Acyl-CoA synthetase long-chain family member 6. [Source:UniProtKB/TrEMBL;Acc:Q6DF45]	IPR000873,AMP-dependent synthetase and ligase	Long-chain-fatty-acid--CoA ligase.	NA	NA	-
XTROP0001S00016115	148411	ENSXETG00000016412	8	liver late down			-1.319		Rasal1-prov protein. [Source:UniProtKB/TrEMBL;Acc:Q66JF5]	IPR000008,C2;IPR001849,Pleckstrin-like;IPR001936,Ras GTPase-activating protein;IPR001562,Tec/Btk	NA	NA	NA	-
XTROP0001S00009736	148721	ENSXETG00000000246	8	liver late down			-1.413		Txn2-prov protein. [Source:UniProtKB/TrEMBL;Acc:Q641J6]	IPR006662,Thioredoxin-related;IPR005746,Thioredoxin;IPR006663,Thioredoxin domain 2	NA	KOG0910|Thioredoxin-like protein|Posttranslational modification, protein turnover, chaperones |CELLULAR PROCESSES AND SIGNALING	NA	-
XTROP0001S00022735	148821	ENSXETG00000026283	8	liver late down			-0.997		Gap junction protein, beta 1, 32kDa (Connexin 32, Charcot-Marie-Tooth neuropathy, X-linked). [Source:UniProtKB/TrEMBL;Acc:Q6NVT8]	IPR000500,Connexins;IPR002267,Gap junction beta-1 protein (Cx32)	NA	NA	NA	-
XTROP0001S00007516	149077	ENSXETG00000009115	8	liver late down			-1.248		Phytanoyl-CoA dioxygenase, peroxisomal Precursor (EC 1.14.11.18)(Phytanoyl-CoA alpha-hydroxylase)(PhyH)(Phytanic acid oxidase) [Source:UniProtKB/Swiss-Prot;Acc:O14832]	IPR008775,Phytanoyl-CoA dioxygenase	Phytanoyl-CoA dioxygenase.	NA	NA	-
XTROP0001S00026049	149530	ENSXETG00000022954	8	liver late down			-2.08		Mitogen-activated protein kinase kinase 6. [Source:UniProtKB/TrEMBL;Acc:Q6GL46]	IPR000719,Protein kinase;IPR001245,Tyrosine protein kinase;IPR002290,Serine/threonine protein kinase;IPR008271,Serine/threonine protein kinase, active site	Phosphotransferases with an alcohol group as acceptor.	NA	1939|protein kinase activity|molecular_function|GO:0004672; 2653|ATP binding|molecular_function|GO:0005524; 3551|protein amino acid phosphorylation|biological_process|GO:0006468; 1979|protein-tyrosine kinase activity|molecular_function|GO:0004713; 1941|protein serine/threonine kinase activity|molecular_function|GO:0004674; 1942|transmembrane receptor protein serine/threonine kinase activity|molec…	-
XTROP0001S00007410	149552	ENSXETG00000010408	8	liver late down			-0.998		MGC108053 protein. [Source:UniProtKB/TrEMBL;Acc:Q5CZL6]	IPR006689,ARF/SAR superfamily;IPR001806,Ras GTPase;IPR006688,ADP-ribosylation factor;IPR006687,GTP-binding protein SAR1;IPR005225,Small GTP-binding protein domain	NA	NA	2654|GTP binding|molecular_function|GO:0005525; 4307|small GTPase mediated signal transduction|biological_process|GO:0007264; 3946|intracellular protein transport|biological_process|GO:0006886	-
XTROP0001S00001352	149585	ENSXETG00000006156	8	liver late down			-0.944		Oncoprotein-induced transcript 3 protein Precursor (Liver-specific zona pellucida domain-containing protein) [Source:UniProtKB/Swiss-Prot;Acc:Q8WWZ8]	IPR001507,Endoglin/CD105 antigen;IPR006209,EGF-like;IPR001881,EGF-like calcium-binding;IPR006210,Type I EGF;NULL,NULL;IPR000152,Aspartic acid and asparagine hydroxylation site	NA	NA	2641|calcium ion binding|molecular_function|GO:0005509	-
XTROP0001S00011965	149629	NA	3	liver late down			-2.876		NA	IPR000295,Proteinase inhibitor I4, leuserpin 2;IPR000215,Proteinase inhibitor I4, serpin	NA	KOG2392|Serpin|Defense mechanisms |CELLULAR PROCESSES AND SIGNALING	2128|serine-type endopeptidase inhibitor activity|molecular_function|GO:0004867	-
XTROP0001S00062032	149629	NA	8	liver late down			-4.569		NA	IPR000295,Proteinase inhibitor I4, leuserpin 2;IPR000215,Proteinase inhibitor I4, serpin	NA	KOG2392|Serpin|Defense mechanisms |CELLULAR PROCESSES AND SIGNALING	2128|serine-type endopeptidase inhibitor activity|molecular_function|GO:0004867	-
XTROP0001S00013667	150649	ENSXETG00000016031	8	liver late down			-1.605		Ectodysplasin A receptor. [Source:UniProtKB/TrEMBL;Acc:Q6DF68]	IPR000488,Death	NA	NA	2644|protein binding|molecular_function|GO:0005515; 4211|signal transduction|biological_process|GO:0007165	-
XTROP0001S00024667	150815	ENSXETG00000002645	8	liver late down			-1.671		Lambda-crystallin homolog [Source:UniProtKB/Swiss-Prot;Acc:Q9Y2S2]	IPR006108,3-hydroxyacyl-CoA dehydrogenase, C-terminal;IPR006176,3-hydroxyacyl-CoA dehydrogenase, NAD-binding;IPR000205,NAD-binding site;IPR006180,3-hydroxyacyl-CoA dehydrogenase	3-hydroxyacyl-CoA dehydrogenase.	NA	3709|fatty acid metabolism|biological_process|GO:0006631; 8235|oxidoreductase activity|molecular_function|GO:0016491; 1203|3-hydroxyacyl-CoA dehydrogenase activity|molecular_function|GO:0003857	-
XTROP0001S00008254	150821	ENSXETG00000003141	8	liver late down			-1.908		Hypothetical LOC496663. [Source:UniProtKB/TrEMBL;Acc:Q5M8X6]	IPR008161,Collagen helix repeat;IPR001304,C-type lectin;IPR008160,Collagen triple helix repeat	NA	NA	2657|sugar binding|molecular_function|GO:0005529; 2855|cytoplasm|cellular_component|GO:0005737; 3886|phosphate transport|biological_process|GO:0006817	-
XTROP0001S00018201	150892	ENSXETG00000027406	8	liver late down			-1.223		Cyclin I. [Source:UniProtKB/TrEMBL;Acc:Q6DJQ8]	IPR006671,Cyclin, N-terminal;IPR006670,Cyclin	NA	NA	72|regulation of cell cycle|biological_process|GO:0000074	-
XTROP0001S00018779	150997	ENSXETG00000025629	8	liver late down			-1.84		Hypothetical protein MGC76315. [Source:UniProtKB/TrEMBL;Acc:Q6P7K0]	IPR002925,Dienelactone hydrolase;IPR000379,Esterase/lipase/thioesterase	NA	KOG3043|Predicted hydrolase related to dienelactone hydrolase|General function prediction only |POORLY CHARACTERIZED	1170|catalytic activity|molecular_function|GO:0003824; 8516|hydrolase activity|molecular_function|GO:0016787	-
XTROP0001S00020426	151462	ENSXETG00000014634	3	liver late down			-1.157		Glycylpeptide N-tetradecanoyltransferase 2 (EC 2.3.1.97)(Peptide N-myristoyltransferase 2)(Myristoyl-CoA:protein N-myristoyltransferase 2)(NMT 2)(Type II N-myristoyltransferase) [Source:UniProtKB/Swiss-Prot;Acc:O60551]	IPR000903,Myristoyl-CoA:protein N-myristoyltransferase	Glycylpeptide N-tetradecanoyltransferase.	NA	NA	-
XTROP0001S00061641	151462	ENSXETG00000014634	8	liver late down			-1.217		Glycylpeptide N-tetradecanoyltransferase 2 (EC 2.3.1.97)(Peptide N-myristoyltransferase 2)(Myristoyl-CoA:protein N-myristoyltransferase 2)(NMT 2)(Type II N-myristoyltransferase) [Source:UniProtKB/Swiss-Prot;Acc:O60551]	IPR000903,Myristoyl-CoA:protein N-myristoyltransferase	Glycylpeptide N-tetradecanoyltransferase.	NA	NA	-
XTROP0001S00020118	151939	ENSXETG00000027557	3	liver late down			-2.973		NA	IPR001747,Lipid transport protein, N-terminal	NA	NA	NA	-
XTROP0001S00064410	151939	NA	8	liver late down			-2.888		NA	IPR001747,Lipid transport protein, N-terminal	NA	NA	NA	-
XTROP0001S00015464	151971	ENSXETG00000011857	8	liver late down			-1.57		Transmembrane protein 30B. [Source:UniProtKB/TrEMBL;Acc:Q6DJ27]	IPR005045,Eukaryotic protein of unknown function DUF284	NA	NA	NA	-
XTROP0001S00025628	152234	ENSXETG00000026269	8	liver late down			-4.338		MGC108342 protein. [Source:UniProtKB/TrEMBL;Acc:Q5BKI0]	IPR001395,Aldo/keto reductase	3-oxo-5-beta-steroid 4-dehydrogenase.	KOG1577|Aldo/keto reductase family proteins|General function prediction only |POORLY CHARACTERIZED	8235|oxidoreductase activity|molecular_function|GO:0016491;16560|3-oxo-5-beta-steroid 4-dehydrogenase activity|molecular_function|GO:0047568	-
XTROP0001S00020428	152658	ENSXETG00000017581	8	liver late down			-2.365		Epoxide hydrolase 2, cytoplasmic. [Source:UniProtKB/TrEMBL;Acc:Q6DJ15]	IPR003089,Alpha/beta hydrolase;IPR000639,Epoxide hydrolase;IPR005833,Haloacid dehalogenase/epoxide hydrolase;IPR000073,Alpha/beta hydrolase fold;IPR005834,Haloacid dehalogenase-like hydrolase;IPR006402,HAD-superfamily hydrolase, subfamily IA, variant 3;IPR000379,Esterase/lipase/thioesterase	Epoxide hydrolase.	NA	1170|catalytic activity|molecular_function|GO:0003824; 3800|aromatic compound metabolism|biological_process|GO:0006725; 8516|hydrolase activity|molecular_function|GO:0016787; 4804|metabolism|biological_process|GO:0008152; 1600|epoxide hydrolase activity|molecular_function|GO:0004301	-
XTROP0001S00027891	153166	ENSXETG00000026514	8	liver late down			-1.486		FXYD domain containing ion transport regulator 1 (Phospholemman). [Source:UniProtKB/TrEMBL;Acc:Q5M8E9]	NA	NA	NA	NA	-
XTROP0001S00001599	153195			liver late down			-1.106		NA		METABOLISM	KOG1285|Beta, beta-carotene 15,15-dioxygenase and related enzymes Secondary metabolites biosynthesis, transport and catabolism METABOLISM	NA	-
XTROP0001S00003644	154089	ENSXETG00000004106	8	liver late down			-1.265		Frizzled-6 Precursor (Fz-6)(hFz6) [Source:UniProtKB/Swiss-Prot;Acc:O60353]	IPR000539,Frizzled protein;IPR000024,Frizzled CRD region;IPR000832,GPCR, family 2, secretin-like	NA	KOG3577|Smoothened and related G-protein-coupled receptors|Signal transduction mechanisms |CELLULAR PROCESSES AND SIGNALING	2146|transmembrane receptor activity|molecular_function|GO:0004888; 4318|development|biological_process|GO:0007275; 7826|membrane|cellular_component|GO:0016020; 2181|non-G-protein coupled 7TM receptor activity|molecular_function|GO:0004926; 4212|cell surface receptor linked signal transduction|biological_process|GO:0007166; 2185|G-protein coupled receptor activity|molecular_function|GO:0004930	-
XTROP0001S00025493	154572	ENSXETG00000008648	8	liver late down			-1.752		Urate oxidase. [Source:UniProtKB/TrEMBL;Acc:Q5I0T2]	IPR002042,Uricase	Urate oxidase.	KOG1599|Uricase (urate oxidase)|Secondary metabolites biosynthesis, transport and catabolism |METABOLISM	2107|urate oxidase activity|molecular_function|GO:0004846; 3244|purine base metabolism|biological_process|GO:0006144	-
XTROP0001S00021321	157047	ENSXETG00000008410	8	liver late down			-1.554		Uncharacterized protein C5orf4 [Source:UniProtKB/Swiss-Prot;Acc:Q96IV6]	IPR006088,Sterol desaturase;IPR006087,SUR2-type hydroxylase/desaturase, catalytic region	Oxidoreductases.	KOG0873|C-4 sterol methyl oxidase|Lipid transport and metabolism |METABOLISM	1170|catalytic activity|molecular_function|GO:0003824; 4804|metabolism|biological_process|GO:0008152; 8235|oxidoreductase activity|molecular_function|GO:0016491;18835|regulation of oxidoreductase activity|biological_process|GO:0051341	-
XTROP0001S00021100	157654	ENSXETG00000001264	8	liver late down			-1.569		Vitamin K-dependent gamma-carboxylase (EC 6.4.-.-)(Gamma-glutamyl carboxylase)(Vitamin K gamma glutamyl carboxylase) [Source:UniProtKB/Swiss-Prot;Acc:P38435]	IPR007782,Vitamin K-dependent gamma-carboxylase;IPR001870,B302, (SPRY)-like;IPR000504,RNA-binding region RNP-1 (RNA recognition motif);IPR000572,Oxidoreductase, molybdopterin binding	Forming carbon-carbon bonds.	NA	1055|nucleic acid binding|molecular_function|GO:0003676; 3218|electron transport|biological_process|GO:0006118; 5122|gamma-glutamyl carboxylase activity|molecular_function|GO:0008488; 8884|peptidyl-glutamic acid carboxylation|biological_process|GO:0017187; 8612|ligase activity, forming carbon-carbon bonds|molecular_function|GO:0016885	-
XTROP0001S00006465	158209	ENSXETG00000016789	8	liver late down			-1.715		Hypothetical LOC496695. [Source:UniProtKB/TrEMBL;Acc:Q5M8U0]	IPR001925,Porin, eukaryotic type	NA	NA	NA	-
XTROP0001S00005696	158319	ENSXETG00000004849	3	liver late down			-3.081		Amine oxidase [flavin-containing] A (EC 1.4.3.4) (Monoamine oxidase type A) (MAO-A). [Source:UniProtKB/Swiss-Prot;Acc:P21397] [from human gene ENSG00000189221]	IPR001613,Flavin-containing amine oxidase;IPR002937,Amine oxidase;IPR000205,NAD-binding site	Amine oxidase (flavin-containing).	KOG0029|Amine oxidase|Secondary metabolites biosynthesis, transport and catabolism |METABOLISM	NA	-
XTROP0001S00065773	158319	ENSXETG00000004849	8	liver late down			-2.435		Amine oxidase [flavin-containing] A (EC 1.4.3.4) (Monoamine oxidase type A) (MAO-A). [Source:UniProtKB/Swiss-Prot;Acc:P21397] [from human gene ENSG00000189221]	IPR001613,Flavin-containing amine oxidase;IPR002937,Amine oxidase;IPR000205,NAD-binding site	Amine oxidase (flavin-containing).	KOG0029|Amine oxidase|Secondary metabolites biosynthesis, transport and catabolism |METABOLISM	NA	-
XTROP0001S00013637	158644	ENSXETG00000019486	8	liver late down			-2.059		NA	IPR000043,S-adenosyl-L-homocysteine hydrolase	Adenosylhomocysteinase.	NA	NA	-
XTROP0001S00020018	161586	ENSXETG00000004757	3	liver late down			-2.649		Aldehyde dehydrogenase 9 family, member A1. [Source:UniProtKB/TrEMBL;Acc:Q6DJQ3]	IPR002086,Aldehyde dehydrogenase	NA	NA	4804|metabolism|biological_process|GO:0008152; 8235|oxidoreductase activity|molecular_function|GO:0016491	-
XTROP0001S00030767	161586	ENSXETG00000004757	8	liver late down			-3.07		Aldehyde dehydrogenase 9 family, member A1. [Source:UniProtKB/TrEMBL;Acc:Q6DJQ3]	IPR002086,Aldehyde dehydrogenase	NA	NA	4804|metabolism|biological_process|GO:0008152; 8235|oxidoreductase activity|molecular_function|GO:0016491	-
XTROP0001S00016496	162484	ENSXETG00000019405	8	liver late down			-0.985		NA	NA	NA	NA	NA	-
XTROP0001S00036137	162537	NA	3	liver late down			-2.364		NA	NA	NA	NA	NA	-
XTROP0001S00024546	162882	NA	8	liver late down			-1.011		NA	IPR001327,FAD-dependent pyridine nucleotide-disulphide oxidoreductase;IPR000960,Flavin-containing monooxygenase FMO;IPR000759,Adrenodoxin reductase;IPR002253,Flavin-containing monooxygenase (FMO) 1;IPR000566,Lipocalin-related protein and Bos/Can/Equ allergen	NA	NA	NA	-
XTROP0001S00023037	163119	ENSXETG00000016054	8	liver late down			-1.207		Thiosulfate sulfurtransferase (Rhodanese). [Source:UniProtKB/TrEMBL;Acc:Q6DK76]	IPR001763,Rhodanese-like;IPR001307,Thiosulfate sulfurtransferase	3-mercaptopyruvate sulfurtransferase.	NA	NA	-
XTROP0001S00018860	163357	ENSXETG00000016146	8	liver late down			-1.24		NA	IPR001071,Cellular retinaldehyde binding/alpha-tocopherol transport;IPR001251,Cellular retinaldehyde-binding)/triple function, C-terminal;IPR008273,Cellular retinaldehyde-binding/triple function, N-terminal;IPR009038,GOLD	Protein-tyrosine-phosphatase.	NA	NA	-
XTROP0001S00002838	164486	ENSXETG00000007527	8	liver late down			-1.495		Integrin alpha-6 Precursor (VLA-6)(CD49 antigen-like family member F)(CD49f antigen) [Contains Integrin alpha-6 heavy chain;Integrin alpha-6 light chain] [Source:UniProtKB/Swiss-Prot;Acc:P23229]	IPR000413,Integrins alpha chain	NA	NA	4201|cell adhesion|biological_process|GO:0007155; 4206|cell-matrix adhesion|biological_process|GO:0007160; 4947|integrin complex|cellular_component|GO:0008305	-
XTROP0001S00000422	164984	ENSXETG00000009311	8	liver late down			-3.468		Alcohol dehydrogenase 1B (EC 1.1.1.1) (Alcohol dehydrogenase beta subunit). [Source:UniProtKB/Swiss-Prot;Acc:P00325] [from human gene ENSG00000196616]	IPR002085,Zinc-containing alcohol dehydrogenase superfamily;IPR002328,Zinc-containing alcohol dehydrogenase;IPR000923,Blue (type 1) copper domain	Alcohol dehydrogenase.	KOG0022|Alcohol dehydrogenase, class III|Secondary metabolites biosynthesis, transport and catabolism |METABOLISM	2626|electron transporter activity|molecular_function|GO:0005489; 2639|copper ion binding|molecular_function|GO:0005507; 3218|electron transport|biological_process|GO:0006118; 4913|zinc ion binding|molecular_function|GO:0008270; 8235|oxidoreductase activity|molecular_function|GO:0016491; 1354|alcohol dehydrogenase activity|molecular_function|GO:0004022; 1355|alcohol dehydrogenase activity, metal …	-
XTROP0001S00025914	166914	ENSXETG00000016850	8	liver late down			-1.159		Major prion protein Precursor (PrP)(PrP27-30)(PrP33-35C)(ASCR)(CD230 antigen) [Source:UniProtKB/Swiss-Prot;Acc:P04156]	IPR000817,Prion protein	NA	NA	NA	-
XTROP0001S00012261	167059	ENSXETG00000008415	8	liver late down			-1.874		Pyruvate carboxylase, mitochondrial Precursor (EC 6.4.1.1)(Pyruvic carboxylase)(PCB) [Source:UniProtKB/Swiss-Prot;Acc:P11498]	IPR000089,Biotin/lipoyl attachment;IPR000891,HMG-CoA lyase-like;IPR003379,Conserved carboxylase region;IPR001882,Biotin-binding site	Pyruvate carboxylase.	KOG0369|Pyruvate carboxylase|Energy production and conversion |METABOLISM	1170|catalytic activity|molecular_function|GO:0003824; 5966|biotin binding|molecular_function|GO:0009374; 2002|pyruvate carboxylase activity|molecular_function|GO:0004736	-
XTROP0001S00016338	167303	ENSXETG00000006611	8	liver late down			-1.82		APOBEC1 complementation factor (APOBEC1-stimulating protein) [Source:UniProtKB/Swiss-Prot;Acc:Q9NQ94]	IPR000504,RNA-binding region RNP-1 (RNA recognition motif);IPR006535,HnRNP R and Q splicing factor	NA	KOG0117|Heterogeneous nuclear ribonucleoprotein R (RRM superfamily)|RNA processing and modification |INFORMATION STORAGE AND PROCESSING	1055|nucleic acid binding|molecular_function|GO:0003676	-
XTROP0001S00023811	167834	ENSXETG00000001660	8	liver late down			-1.611		Cytochrome P450 2J2 (EC 1.14.14.1)(CYPIIJ2)(Arachidonic acid epoxygenase) [Source:UniProtKB/Swiss-Prot;Acc:P51589]	IPR001128,Cytochrome P450;IPR002401,E-class P450, group I	Unspecific monooxygenase.	KOG0156|Cytochrome P450 CYP2 subfamily|Secondary metabolites biosynthesis, transport and catabolism |METABOLISM	3218|electron transport|biological_process|GO:0006118; 1783|monooxygenase activity|molecular_function|GO:0004497;17878|unspecific monooxygenase activity|molecular_function|GO:0050381	-
XTROP0001S00016495	169607	NA	3	liver late down			-1.789		NA	IPR001071,Cellular retinaldehyde binding/alpha-tocopherol transport;IPR008273,Cellular retinaldehyde-binding/triple function, N-terminal	NA	KOG1471|Phosphatidylinositol transfer protein SEC14 and related proteins|Lipid transport and metabolism |METABOLISM	2450|transporter activity|molecular_function|GO:0005215; 2746|intracellular|cellular_component|GO:0005622; 3879|transport|biological_process|GO:0006810	-
XTROP0001S00040447	169607	NA	8	liver late down			-1.827		NA	IPR001071,Cellular retinaldehyde binding/alpha-tocopherol transport;IPR008273,Cellular retinaldehyde-binding/triple function, N-terminal	NA	KOG1471|Phosphatidylinositol transfer protein SEC14 and related proteins|Lipid transport and metabolism |METABOLISM	2450|transporter activity|molecular_function|GO:0005215; 2746|intracellular|cellular_component|GO:0005622; 3879|transport|biological_process|GO:0006810	-
XTROP0001S00021077	171485	ENSXETG00000002228	3	liver late down			-1.594		MGC89719 protein. [Source:UniProtKB/TrEMBL;Acc:Q66KC4]	IPR002347,Glucose/ribitol dehydrogenase;IPR002198,Short-chain dehydrogenase/reductase SDR;IPR003033,Sterol-binding	Estradiol 17 beta-dehydrogenase.	KOG0725|Reductases with broad range of substrate specificities|General function prediction only |POORLY CHARACTERIZED	4804|metabolism|biological_process|GO:0008152; 8235|oxidoreductase activity|molecular_function|GO:0016491; 2630|sterol carrier activity|molecular_function|GO:0005498; 1601|estradiol 17-beta-dehydrogenase activity|molecular_function|GO:0004303	-
XTROP0001S00032848	171485	ENSXETG00000002228	8	liver late down			-1.916		MGC89719 protein. [Source:UniProtKB/TrEMBL;Acc:Q66KC4]	IPR002347,Glucose/ribitol dehydrogenase;IPR002198,Short-chain dehydrogenase/reductase SDR;IPR003033,Sterol-binding	Estradiol 17 beta-dehydrogenase.	KOG0725|Reductases with broad range of substrate specificities|General function prediction only |POORLY CHARACTERIZED	4804|metabolism|biological_process|GO:0008152; 8235|oxidoreductase activity|molecular_function|GO:0016491; 2630|sterol carrier activity|molecular_function|GO:0005498; 1601|estradiol 17-beta-dehydrogenase activity|molecular_function|GO:0004303	-
XTROP0001S00002409	172612	ENSXETG00000013468	8	liver late down			-1.241		NA	NA	NA	NA	NA	-
XTROP0001S00000800	174777	ENSXETG00000010876	8	liver late down			-1.597		Cingulin-like protein 1 (Paracingulin)(Junction-associated coiled-coil protein) [Source:UniProtKB/Swiss-Prot;Acc:Q0VF96]	IPR000533,Tropomyosin	NA	KOG0161|Myosin class II heavy chain|Cytoskeleton |CELLULAR PROCESSES AND SIGNALING	NA	-
XTROP0001S00019299	176707	ENSXETG00000002522	8	liver late down			-1.584		LOC496495 protein (Fragment). [Source:UniProtKB/TrEMBL;Acc:Q5XGG6]	IPR003135,ATP-dependent carboxylate-amine ligase-like, ATP-grasp;IPR005809,Succinyl-CoA synthetase, beta subunit	Succinate--CoA ligase (GDP-forming).	NA	1170|catalytic activity|molecular_function|GO:0003824; 4804|metabolism|biological_process|GO:0008152; 2038|succinate-CoA ligase (GDP-forming) activity|molecular_function|GO:0004776;13264|succinate-CoA ligase complex|cellular_component|GO:0042709;14264|succinate-CoA ligase complex (GDP-forming)|cellular_component|GO:0045244	-
XTROP0001S00026625	177866	ENSXETG00000015227	3	liver late down			-1.134		Sideroflexin 2. [Source:UniProtKB/TrEMBL;Acc:Q5XGE6]	IPR004686,Tricarboxylate/iron carrier	NA	NA	NA	-
XTROP0001S00032640	177866	ENSXETG00000015227	8	liver late down			-1.247		Sideroflexin 2. [Source:UniProtKB/TrEMBL;Acc:Q5XGE6]	IPR004686,Tricarboxylate/iron carrier	NA	NA	NA	-
XTROP0001S00009352	177909	ENSXETG00000006124	8	liver late down			-1.442		Immunoglobulin superfamily member 5 (Junctional adhesion molecule 4) [Source:UniProtKB/Swiss-Prot;Acc:Q9NSI5]	IPR007110,Immunoglobulin-like;IPR003599,Immunoglobulin subtype	NA	NA	NA	-
XTROP0001S00025607	178167	ENSXETG00000008154	8	liver late down			-1.489		NA	IPR005036,Putative phosphatase regulatory subunit	Serine/threonine specific protein phosphatase.	NA	NA	-
XTROP0001S00006449	178402	ENSXETG00000004606	8	liver late down			-1.192		Gamma-butyrobetaine dioxygenase (EC 1.14.11.1)(Gamma-butyrobetaine,2-oxoglutarate dioxygenase)(Gamma-butyrobetaine hydroxylase)(Gamma-BBH) [Source:UniProtKB/Swiss-Prot;Acc:O75936]	IPR004994,Gamma-butyrobetaine hydroxylase	Gamma-butyrobetaine,2-oxoglutarate dioxygenase.	NA	NA	-
XTROP0001S00024075	180056	ENSXETG00000023043	8	liver late down			-1.426		Staphylococcal nuclease domain containing 1. [Source:UniProtKB/TrEMBL;Acc:Q6P4X4]	IPR006022,Staphylococcus nuclease subtype;IPR006021,Staphylococcus nuclease (SNase-like)	NA	KOG2039|Transcriptional coactivator p100|Transcription |INFORMATION STORAGE AND PROCESSING	NA	-
XTROP0001S00042112	180095	ENSXETG00000008796	3	liver late down			-1.236		Cytochrome P450 2C8 (EC 1.14.14.1) (CYPIIC8) (P450 form 1) (P450 MP- 12/MP-20) (P450 IIC2) (S-mephenytoin 4-hydroxylase). [Source:UniProtKB/Swiss-Prot;Acc:P10632] [from human gene ENSG00000138115]	IPR001128,Cytochrome P450;IPR002401,E-class P450, group I	Unspecific monooxygenase.	KOG0156|Cytochrome P450 CYP2 subfamily|Secondary metabolites biosynthesis, transport and catabolism |METABOLISM	NA	-
XTROP0001S00004143	180256	NA	8	liver late down			-1.138		NA	IPR005814,Aminotransferase class-III;IPR004631,4-aminobutyrate aminotransferase eukaryotic	4-aminobutyrate aminotransferase.	NA	NA	-
XTROP0001S00009447	180691	ENSXETG00000006826	8	liver late down			-1.293		Acyl-CoA synthetase family member 2, mitochondrial Precursor (EC 6.2.1.-) [Source:UniProtKB/Swiss-Prot;Acc:Q96CM8]	NA	NA	KOG1177|Long chain fatty acid acyl-CoA ligase|Lipid transport and metabolism |METABOLISM	NA	-
XTROP0001S00011399	181030	ENSXETG00000003443	8	liver late down			-1.48		LOC496669 protein (Fragment). [Source:UniProtKB/TrEMBL;Acc:Q5M8W9]	IPR002220,Dihydrodipicolinate synthetase	Dihydrodipicolinate synthase.	NA	NA	-
XTROP0001S00000502	181157	ENSXETG00000004411	8	liver late down			-2.387		Hypothetical LOC496749. [Source:UniProtKB/TrEMBL;Acc:Q5M8I0]	IPR002198,Short-chain dehydrogenase/reductase SDR;IPR002347,Glucose/ribitol dehydrogenase	Retinol dehydrogenase.	NA	NA	-
XTROP0001S00007502	185158	ENSXETG00000003713	8	liver late down			-1.258		Thimet oligopeptidase (EC 3.4.24.15)(Endopeptidase 24.15)(MP78) [Source:UniProtKB/Swiss-Prot;Acc:P52888]	IPR001567,Peptidase M3A and M3B, thimet/oligopeptidase F;IPR006025,Peptidase M, neutral zinc metallopeptidases, zinc-binding site	Thimet oligopeptidase.	KOG2089|Metalloendopeptidase family - saccharolysin & thimet oligopeptidase|Posttranslational modification, protein turnover, chaperones |CELLULAR PROCESSES AND SIGNALING	1549|metalloendopeptidase activity|molecular_function|GO:0004222; 3588|proteolysis and peptidolysis|biological_process|GO:0006508; 4883|metallopeptidase activity|molecular_function|GO:0008237; 4913|zinc ion binding|molecular_function|GO:0008270	-
XTROP0001S00020393	185460	ENSXETG00000017401	8	liver late down			-1.222		NA	NA	NA	NA	NA	-
XTROP0001S00018785	189107	ENSXETG00000007140	8	liver late down			-2.168		NA	IPR004839,Aminotransferase, class I and II	Alanine aminotransferase.	KOG0258|Alanine aminotransferase|Amino acid transport and metabolism |METABOLISM	5660|biosynthesis|biological_process|GO:0009058; 8498|transferase activity, transferring nitrogenous groups|molecular_function|GO:0016769; 1353|alanine transaminase activity|molecular_function|GO:0004021	-
XTROP0001S00019993	189757	ENSXETG00000009060	8	liver late down			-1.335		NA	IPR002213,UDP-glucuronosyl/UDP-glucosyltransferase	UDP-glucuronosyltransferase.	KOG1192|UDP-glucuronosyl and UDP-glucosyl transferase|Energy production and conversion |METABOLISM;KOG1192|UDP-glucuronosyl and UDP-glucosyl transferase|Carbohydrate transport and metabolism |METABOLISM	4804|metabolism|biological_process|GO:0008152; 8488|transferase activity, transferring hexosyl groups|molecular_function|GO:0016758; 6857|glucuronosyltransferase activity|molecular_function|GO:0015020	-
XTROP0001S00013939	189966	NA	8	liver late down			-1.007		NA	IPR001128,Cytochrome P450;IPR002401,E-class P450, group I	NA	NA	3218|electron transport|biological_process|GO:0006118; 1783|monooxygenase activity|molecular_function|GO:0004497	-
XTROP0001S00035170	192892	ENSXETG00000025755	3	liver late down			-1.37		NA	IPR001128,Cytochrome P450;IPR002401,E-class P450, group I	Unspecific monooxygenase.	NA	3218|electron transport|biological_process|GO:0006118; 1783|monooxygenase activity|molecular_function|GO:0004497;17878|unspecific monooxygenase activity|molecular_function|GO:0050381	-
XTROP0001S00011419	193269	NA	8	liver late down			-1.057		NA	IPR000353,Class II histocompatibility antigen, beta chain, beta-1	NA	NA	4010|immune response|biological_process|GO:0006955; 7826|membrane|cellular_component|GO:0016020	-
XTROP0001S00002922	193548	ENSXETG00000013957	8	liver late down			-1.579		NA	IPR001557,L-lactate/malate dehydrogenase;IPR001236,Lactate/malate dehydrogenase	L-lactate dehydrogenase.	KOG1495|Lactate dehydrogenase|Energy production and conversion |METABOLISM	3200|tricarboxylic acid cycle intermediate metabolism|biological_process|GO:0006100; 8235|oxidoreductase activity|molecular_function|GO:0016491; 1748|L-lactate dehydrogenase activity|molecular_function|GO:0004459; 3196|glycolysis|biological_process|GO:0006096	-
XTROP0001S00020732	198637	ENSXETG00000008941	8	liver late down			-2.896		Corticosteroid 11-beta-dehydrogenase isozyme 1 (EC 1.1.1.146)(11-beta-hydroxysteroid dehydrogenase 1)(11-beta-HSD1)(11-DH) [Source:UniProtKB/Swiss-Prot;Acc:P28845]	IPR002347,Glucose/ribitol dehydrogenase;IPR002198,Short-chain dehydrogenase/reductase SDR	11-beta-hydroxysteroid dehydrogenase.	NA	NA	-
XTROP0001S00012834	199612	ENSXETG00000008462	8	liver late down			-1.379		Alkyldihydroxyacetonephosphate synthase, peroxisomal Precursor (Alkyl-DHAP synthase)(EC 2.5.1.26)(Alkylglycerone-phosphate synthase)(Aging-associated gene 5 protein) [Source:UniProtKB/Swiss-Prot;Acc:O00116]	IPR006094,FAD linked oxidase, N-terminal;IPR004113,FAD linked oxidase, C-terminal	Alkylglycerone-phosphate synthase.	NA	NA	-
XTROP0001S00017026	200429	ENSXETG00000021260	8	liver late down			-1.384		Alpha-mannosidase II (EC 3.2.1.114) (Mannosyl-oligosaccharide 1,3-1,6- alpha-mannosidase) (MAN II) (Golgi alpha-mannosidase II) (Mannosidase alpha class 2A member 1). [Source:UniProtKB/Swiss-Prot;Acc:Q16706] [from human gene ENSG00000112893]	IPR000602,Glycoside hydrolase, family 38	Mannosyl-oligosaccharide 1,3-1,6-alpha-mannosidase.	KOG1958|Glycosyl hydrolase, family 38 - alpha-mannosidase|Carbohydrate transport and metabolism |METABOLISM	NA	-
XTROP0001S00050496	200528	ENSXETG00000019609	3	liver late down			-1.616		NA	IPR001128,Cytochrome P450;IPR002401,E-class P450, group I;IPR008066,E-class P450, CYP IA	Unspecific monooxygenase.	NA	NA	-
XTROP0001S00007426	200528	ENSXETG00000019609	8	liver late down			-1.593		NA	IPR001128,Cytochrome P450;IPR002401,E-class P450, group I;IPR008066,E-class P450, CYP IA	Unspecific monooxygenase.	NA	NA	-
XTROP0001S00025328	200775	ENSXETG00000000104	8	liver late down			-1.722		LOC496642 protein (Fragment). [Source:UniProtKB/TrEMBL;Acc:Q5M8Z9]	IPR003010,Nitrilase/cyanide hydratase and apolipoprotein N-acyltransferase;IPR002160,Proteinase inhibitor I3, Kunitz legume	In linear amides.	NA	NA	-
XTROP0001S00024054	200908	ENSXETG00000019506	8	liver late down			-1.172		Beta-galactosamide alpha-2,6-sialyltransferase. [Source:UniProtKB/TrEMBL;Acc:Q704X5]	IPR001675,Glycosyl transferase, family 29	Transferring other glycosyl groups.	KOG2692|Sialyltransferase|Carbohydrate transport and metabolism |METABOLISM	NA	-
XTROP0001S00013994	201493	ENSXETG00000001821	8	liver late down			-2.886		Sterol O-acyltransferase 2 (EC 2.3.1.26)(Cholesterol acyltransferase 2)(Acyl coenzyme A:cholesterol acyltransferase 2)(ACAT-2) [Source:UniProtKB/Swiss-Prot;Acc:O75908]	IPR004299,Membrane bound O-acyl transferase, MBOAT	Sterol O-acyltransferase.	NA	NA	-
XTROP0001S00005201	201535	ENSXETG00000002238	8	liver late down			-1.251		Paralemmin-2 [Source:UniProtKB/Swiss-Prot;Acc:Q8IXS6]	NA	NA	KOG4415|Uncharacterized conserved protein|Function unknown |POORLY CHARACTERIZED	NA	-
XTROP0001S00010089	201778	ENSXETG00000007241	8	liver late down			-1.769		NA	IPR002108,Actin-binding, cofilin/tropomyosin type	NA	KOG3655|Drebrins and related actin binding proteins|Cytoskeleton |CELLULAR PROCESSES AND SIGNALING	NA	-
XTROP0001S00010671	202466	ENSXETG00000010861	8	liver late down			-2.519		Aquaporin-9 (AQP-9)(Small solute channel 1) [Source:UniProtKB/Swiss-Prot;Acc:O43315]	IPR000425,Major intrinsic protein	NA	KOG0224|Aquaporin (major intrinsic protein family)|Carbohydrate transport and metabolism |METABOLISM	NA	-
XTROP0001S00004785	203851	ENSXETG00000008798	8	liver late down			-2.599		LOC548374 protein (Fragment). [Source:UniProtKB/TrEMBL;Acc:Q5FVX6]	IPR001128,Cytochrome P450;IPR002401,E-class P450, group I	Unspecific monooxygenase.	NA	NA	-
XTROP0001S00023534	205183	ENSXETG00000015062	8	liver late down			-1.688		2-acylglycerol O-acyltransferase 2 (EC 2.3.1.22)(Monoacylglycerol O-acyltransferase 2)(Acyl CoA:monoacylglycerol acyltransferase 2)(MGAT2)(hMGAT2)(Diacylglycerol acyltransferase 2-like protein 5)(Diacylglycerol O-acyltransferase candidate 5)(hDC5) [Source:UniProtKB/Swiss-Prot;Acc:Q3SYC2]	IPR007130,Diacylglycerol acyltransferase	NA	NA	NA	-
XTROP0001S00015372	205323	ENSXETG00000000504	8	liver late down			-1.055		2-amino-3-carboxymuconate-6-semialdehyde decarboxylase (EC 4.1.1.45) [Source:UniProtKB/Swiss-Prot;Acc:Q8TDX5]	IPR006992,Amidohydrolase 2	Aminocarboxymuconate-semialdehyde decarboxylase.	NA	850|aminocarboxymuconate-semialdehyde decarboxylase activity|molecular_function|GO:0001760; 4804|metabolism|biological_process|GO:0008152	-
XTROP0001S00057780	207632	ENSXETG00000012212	3	liver late down			-1.621		NA	IPR002347,Glucose/ribitol dehydrogenase;IPR002198,Short-chain dehydrogenase/reductase SDR	NA	KOG1205|Predicted dehydrogenase|Secondary metabolites biosynthesis, transport and catabolism |METABOLISM	4804|metabolism|biological_process|GO:0008152; 8235|oxidoreductase activity|molecular_function|GO:0016491	-
XTROP0001S00020840	207851	ENSXETG00000001267	8	liver late down			-1.165		Transmembrane protein 150 Precursor [Source:UniProtKB/Swiss-Prot;Acc:Q86TG1]	NA	NA	NA	NA	-
XTROP0001S00022146	209749	ENSXETG00000002376	8	liver late down			-2.228		Hypothetical protein. [Source:UniProtKB/TrEMBL;Acc:Q640T6]	IPR002018,Carboxylesterase, type B;IPR000379,Esterase/lipase/thioesterase	NA	NA	NA	-
XTROP0001S00022500	210949	ENSXETG00000018446	8	liver late down			-1.392		3-ketoacyl-CoA thiolase, peroxisomal Precursor (EC 2.3.1.16)(Beta-ketothiolase)(Acetyl-CoA acyltransferase)(Peroxisomal 3-oxoacyl-CoA thiolase) [Source:UniProtKB/Swiss-Prot;Acc:P09110]	IPR002155,Thiolase	NA	KOG1389|3-oxoacyl CoA thiolase|Lipid transport and metabolism |METABOLISM	NA	-
XTROP0001S00024009	212616	ENSXETG00000026734	8	liver late down			-1.298		Hypothetical protein (Fragment). [Source:UniProtKB/TrEMBL;Acc:Q5HZC6]	IPR007110,Immunoglobulin-like;IPR003597,Immunoglobulin C1 type;IPR003596,Immunoglobulin V-type;IPR003599,Immunoglobulin subtype;IPR003006,Immunoglobulin/major histocompatibility complex	NA	NA	NA	-
XTROP0001S00026486	213209	NA	3	liver late down			-1.454		NA	IPR000863,Sulfotransferase	NA	NA	NA	-
XTROP0001S00035140	213209	NA	8	liver late down			-2.181		NA	IPR000863,Sulfotransferase	NA	NA	NA	-
XTROP0001S00021933	264667	ENSXETG00000007884	8	liver late down			-1.551		Sulfotransferase 6B1 (EC 2.8.2.-). [Source:UniProtKB/Swiss-Prot;Acc:Q6IMI4] [from human gene ENSG00000138068]	IPR000863,Sulfotransferase	Sulfotransferases.	NA	NA	-
XTROP0001S00015327	266779	ENSXETG00000023618	8	liver late down			-1.07		Caldesmon (CDM) [Source:UniProtKB/Swiss-Prot;Acc:Q05682]	IPR006017,Caldesmon	NA	NA	NA	-
XTROP0001S00006882	267166	ENSXETG00000012583	3	liver late down			-1.786		Glucose-6-phosphatase (EC 3.1.3.9) (G6Pase) (G-6-Pase). [Source:UniProtKB/Swiss-Prot;Acc:P35575] [from human gene ENSG00000131482]	IPR000326,Phosphoesterase, PA-phosphatase related	Glucose-6-phosphatase.	NA	NA	-
XTROP0001S00061758	267166	ENSXETG00000012583	8	liver late down			-2.001		Glucose-6-phosphatase (EC 3.1.3.9) (G6Pase) (G-6-Pase). [Source:UniProtKB/Swiss-Prot;Acc:P35575] [from human gene ENSG00000131482]	IPR000326,Phosphoesterase, PA-phosphatase related	Glucose-6-phosphatase.	NA	NA	-
XTROP0001S00007674	267222	ENSXETG00000019001	8	liver late down			-2.249		Niemann-Pick C1-like protein 1 Precursor [Source:UniProtKB/Swiss-Prot;Acc:Q9UHC9]	IPR003392,Patched;IPR004765,Niemann-Pick C type protein;IPR000731,Sterol-sensing 5TM box	NA	KOG1933|Cholesterol transport protein (Niemann-Pick C disease protein)|Lipid transport and metabolism |METABOLISM	NA	-
XTROP0001S00030156	267451	ENSXETG00000019760	3	liver late down			-1.555		Four and a half LIM domains 1. [Source:UniProtKB/TrEMBL;Acc:Q6DIX2]	IPR001781,Zn-binding protein, LIM;IPR000962,Zn-finger, prokaryotic DksA/TraR C4 type;IPR000345,Cytochrome c heme-binding site	NA	KOG2272|Focal adhesion protein PINCH-1, contains LIM domains|Signal transduction mechanisms |CELLULAR PROCESSES AND SIGNALING;KOG2272|Focal adhesion protein PINCH-1, contains LIM domains|Cytoskeleton |CELLULAR PROCESSES AND SIGNALING	NA	-
XTROP0001S00000078	271271	ENSXETG00000025142	8	liver late down			-4.148		Dimethylaniline monooxygenase [N-oxide-forming] 3 (EC 1.14.13.8) (Hepatic flavin-containing monooxygenase 3) (FMO 3) (Dimethylaniline oxidase 3) (FMO form 2) (FMO II). [Source:UniProtKB/Swiss-Prot;Acc:P31513] [from human gene ENSG00000007933]	IPR001327,FAD-dependent pyridine nucleotide-disulphide oxidoreductase;IPR000960,Flavin-containing monooxygenase FMO;IPR000759,Adrenodoxin reductase;IPR002255,Flavin-containing monooxygenase (FMO) 3;IPR002257,Flavin-containing monooxygenase (FMO) 5	NA	NA	3218|electron transport|biological_process|GO:0006118; 1783|monooxygenase activity|molecular_function|GO:0004497; 6871|disulfide oxidoreductase activity|molecular_function|GO:0015036; 1785|dimethylaniline monooxygenase (N-oxide-forming) activity|molecular_function|GO:0004499; 2907|microsome|cellular_component|GO:0005792	-
XTROP0001S00013457	272580	ENSXETG00000005615	3	liver late down			-1.717		Multifunctional protein ADE2 [Includes Phosphoribosylaminoimidazole-succinocarboxamide synthase(EC 6.3.2.6)(SAICAR synthetase);Phosphoribosylaminoimidazole carboxylase(EC 4.1.1.21)(AIR carboxylase)(AIRC)] [Source:UniProtKB/Swiss-Prot;Acc:P22234]	IPR001636,SAICAR synthetase	NA	NA	1909|phosphoribosylaminoimidazolesuccinocarboxamide synthase activity|molecular_function|GO:0004639; 3264|purine nucleotide biosynthesis|biological_process|GO:0006164	-
XTROP0001S00031120	272580	ENSXETG00000005615	8	liver late down			-1.398		Multifunctional protein ADE2 [Includes Phosphoribosylaminoimidazole-succinocarboxamide synthase(EC 6.3.2.6)(SAICAR synthetase);Phosphoribosylaminoimidazole carboxylase(EC 4.1.1.21)(AIR carboxylase)(AIRC)] [Source:UniProtKB/Swiss-Prot;Acc:P22234]	IPR001636,SAICAR synthetase	NA	NA	1909|phosphoribosylaminoimidazolesuccinocarboxamide synthase activity|molecular_function|GO:0004639; 3264|purine nucleotide biosynthesis|biological_process|GO:0006164	-
XTROP0001S00061877	275240	ENSXETG00000020454	3	liver late down			-2.032		Hypothetical protein MGC69490. [Source:UniProtKB/TrEMBL;Acc:Q6NVR6]	IPR002957,Keratin, type I;IPR003054,Type II keratin;IPR001664,Intermediate filament protein	NA	NA	NA	-
XTROP0001S00036370	275461	ENSXETG00000016227	3	liver late down			-1.76		Kynurenine 3-monooxygenase (Kynurenine 3-hydroxylase). [Source:UniProtKB/TrEMBL;Acc:Q6DIZ8]	IPR003042,Aromatic-ring hydroxylase;IPR000733,Flavoprotein monooxygenase	Kynurenine 3-monooxygenase.	KOG2614|Kynurenine 3-monooxygenase and related flavoprotein monooxygenases|Energy production and conversion |METABOLISM;KOG2614|Kynurenine 3-monooxygenase and related flavoprotein monooxygenases|General function prediction only |POORLY CHARACTERIZED	NA	-
XTROP0001S00002094	275461	ENSXETG00000016227	8	liver late down			-1.732		Kynurenine 3-monooxygenase (Kynurenine 3-hydroxylase). [Source:UniProtKB/TrEMBL;Acc:Q6DIZ8]	IPR003042,Aromatic-ring hydroxylase;IPR000733,Flavoprotein monooxygenase	Kynurenine 3-monooxygenase.	KOG2614|Kynurenine 3-monooxygenase and related flavoprotein monooxygenases|Energy production and conversion |METABOLISM;KOG2614|Kynurenine 3-monooxygenase and related flavoprotein monooxygenases|General function prediction only |POORLY CHARACTERIZED	NA	-
XTROP0001S00009118	275512	ENSXETG00000005754	8	liver late down			-1.576		NA	IPR001085,Glycine hydroxymethyltransferase	Glycine hydroxymethyltransferase.	NA	NA	-
XTROP0001S00027903	275642	ENSXETG00000006541	8	liver late down			-1.258		LOC594879 protein (Fragment). [Source:UniProtKB/TrEMBL;Acc:Q5BKI3]	IPR006139,D-isomer specific 2-hydroxyacid dehydrogenase, catalytic region;IPR006140,D-isomer specific 2-hydroxyacid dehydrogenase, NAD-binding	NA	KOG0069|Glyoxylate/hydroxypyruvate reductase (D-isomer-specific 2-hydroxy acid dehydrogenase superfamily)|Energy production and conversion |METABOLISM	NA	-
XTROP0001S00012580	276040	ENSXETG00000002997	8	liver late down			-2.311		Crystallin, zeta (Quinone reductase). [Source:UniProtKB/TrEMBL;Acc:Q6DJR0]	IPR002085,Zinc-containing alcohol dehydrogenase superfamily;IPR002364,Quinone oxidoreductase/zeta-crystallin	NADPH:quinone reductase.	KOG1198|Zinc-binding oxidoreductase|Energy production and conversion |METABOLISM;KOG1198|Zinc-binding oxidoreductase|General function prediction only |POORLY CHARACTERIZED	4913|zinc ion binding|molecular_function|GO:0008270; 8235|oxidoreductase activity|molecular_function|GO:0016491; 1299|NADPH:quinone reductase activity|molecular_function|GO:0003960	-
XTROP0001S00026688	279120	NA	8	liver late down			-2.38		NA	IPR000997,Cholinesterase;IPR002018,Carboxylesterase, type B;IPR000379,Esterase/lipase/thioesterase	Cholinesterase.	NA	1170|catalytic activity|molecular_function|GO:0003824; 1432|cholinesterase activity|molecular_function|GO:0004104	-
XTROP0001S00021973	279816	NA	8	liver late down			-1.015		NA	IPR006090,Acyl-CoA dehydrogenase, C-terminal;IPR002575,Aminoglycoside phosphotransferase;IPR006091,Acyl-CoA dehydrogenase, central region;IPR008266,Tyrosine protein kinase, active site;IPR000169,Peptidase, eukaryotic cysteine peptidase active site	Acyl-CoA dehydrogenase.	NA	1525|cysteine-type endopeptidase activity|molecular_function|GO:0004197; 3588|proteolysis and peptidolysis|biological_process|GO:0006508; 3218|electron transport|biological_process|GO:0006118; 8235|oxidoreductase activity|molecular_function|GO:0016491; 1331|acyl-CoA dehydrogenase activity|molecular_function|GO:0003995; 1979|protein-tyrosine kinase activity|molecular_function|GO:0004713; 2653|ATP …	-
XTROP0001S00022341	280917	NA	8	liver late down			-2.987		NA	IPR000863,Sulfotransferase	Alcohol sulfotransferase.	KOG1584|Sulfotransferase|General function prediction only |POORLY CHARACTERIZED	4799|sulfotransferase activity|molecular_function|GO:0008146; 1359|alcohol sulfotransferase activity|molecular_function|GO:0004027	-
XTROP0001S00054198	283976	NA	3	liver late down			-1.661		NA	IPR000175,Sodium:neurotransmitter symporter	NA	NA	2536|neurotransmitter:sodium symporter activity|molecular_function|GO:0005328; 2992|integral to plasma membrane|cellular_component|GO:0005887; 3902|neurotransmitter transport|biological_process|GO:0006836; 7826|membrane|cellular_component|GO:0016020	-
XTROP0001S00061479	283976	NA	8	liver late down			-1.412		NA	IPR000175,Sodium:neurotransmitter symporter	NA	NA	2536|neurotransmitter:sodium symporter activity|molecular_function|GO:0005328; 2992|integral to plasma membrane|cellular_component|GO:0005887; 3902|neurotransmitter transport|biological_process|GO:0006836; 7826|membrane|cellular_component|GO:0016020	-
XTROP0001S00017272	286677	ENSXETG00000026124	3	liver late down			-2.45		MGC108395 protein. [Source:UniProtKB/TrEMBL;Acc:Q5BKH0]	IPR000834,Peptidase M14, carboxypeptidase A;IPR003146,Proteinase inhibitor, carboxypeptidase propeptide	Carboxypeptidase U.	KOG2650|Zinc carboxypeptidase|Function unknown |POORLY CHARACTERIZED	1510|carboxypeptidase A activity|molecular_function|GO:0004182; 3588|proteolysis and peptidolysis|biological_process|GO:0006508; 1508|carboxypeptidase activity|molecular_function|GO:0004180	-
XTROP0001S00032439	286677	ENSXETG00000026124	8	liver late down			-2.208		MGC108395 protein. [Source:UniProtKB/TrEMBL;Acc:Q5BKH0]	IPR000834,Peptidase M14, carboxypeptidase A;IPR003146,Proteinase inhibitor, carboxypeptidase propeptide	Carboxypeptidase U.	KOG2650|Zinc carboxypeptidase|Function unknown |POORLY CHARACTERIZED	1510|carboxypeptidase A activity|molecular_function|GO:0004182; 3588|proteolysis and peptidolysis|biological_process|GO:0006508; 1508|carboxypeptidase activity|molecular_function|GO:0004180	-
XTROP0001S00013362	287975	ENSXETG00000023676	3	liver late down			-1.637		NA	IPR006090,Acyl-CoA dehydrogenase, C-terminal;IPR002655,Acyl-CoA oxidase	Acyl-CoA oxidase.	NA	NA	-
XTROP0001S00063354	287975	ENSXETG00000023676	8	liver late down			-1.568		NA	IPR006090,Acyl-CoA dehydrogenase, C-terminal;IPR002655,Acyl-CoA oxidase	Acyl-CoA oxidase.	NA	NA	-
XTROP0001S00025296	289221	ENSXETG00000023395	3	liver late down			-4.172		Hypothetical protein. [Source:UniProtKB/TrEMBL;Acc:Q5CZZ1]	IPR000264,Serum albumin;IPR001703,Alpha-fetoprotein	NA	NA	2582|carrier activity|molecular_function|GO:0005386; 2739|extracellular space|cellular_component|GO:0005615; 3879|transport|biological_process|GO:0006810	-
XTROP0001S00061710	289221	ENSXETG00000023395	3	liver late down			-3.663		Hypothetical protein. [Source:UniProtKB/TrEMBL;Acc:Q5CZZ1]	IPR000264,Serum albumin;IPR001703,Alpha-fetoprotein	NA	NA	2582|carrier activity|molecular_function|GO:0005386; 2739|extracellular space|cellular_component|GO:0005615; 3879|transport|biological_process|GO:0006810	-
XTROP0001S00061711	289221	ENSXETG00000023395	8	liver late down			-4.06		Hypothetical protein. [Source:UniProtKB/TrEMBL;Acc:Q5CZZ1]	IPR000264,Serum albumin;IPR001703,Alpha-fetoprotein	NA	NA	2582|carrier activity|molecular_function|GO:0005386; 2739|extracellular space|cellular_component|GO:0005615; 3879|transport|biological_process|GO:0006810	-
XTROP0001S00021176	290482	ENSXETG00000002377	8	liver late down			-2.321		NA	IPR002018,Carboxylesterase, type B;IPR000379,Esterase/lipase/thioesterase	Carboxylesterase.	KOG1516|Carboxylesterase and related proteins|General function prediction only |POORLY CHARACTERIZED	NA	-
XTROP0001S00019681	292258	ENSXETG00000025493	8	liver late down			-1.631		LOC496781 protein (Fragment). [Source:UniProtKB/TrEMBL;Acc:Q5M8E7]	IPR002383,Coagulation factor, Gla region;IPR006209,EGF-like;IPR001254,Peptidase S1, chymotrypsin;IPR000294,Vitamin K-dependent carboxylation/gamma-carboxyglutamic region;IPR001881,EGF-like calcium-binding;IPR006210,Type I EGF;IPR000742,EGF-like, subtype 2;IPR000152,Aspartic acid and asparagine hydroxylation site	Coagulation factor IXa.	NA	NA	-
XTROP0001S00012110	292259	ENSXETG00000025492	8	liver late down			-1.261		MGC107878 protein. [Source:UniProtKB/TrEMBL;Acc:Q5FW21]	IPR002383,Coagulation factor, Gla region;IPR001438,Type II EGF-like signature;IPR001314,Peptidase S1A, chymotrypsin;IPR006209,EGF-like;IPR001254,Peptidase S1, chymotrypsin;IPR000294,Vitamin K-dependent carboxylation/gamma-carboxyglutamic region;IPR001881,EGF-like calcium-binding;IPR006210,Type I EGF;IPR000742,EGF-like, subtype 2;NULL,NULL;IPR000152,Aspartic acid and asparagine hydroxylation site	Coagulation factor Xa.	NA	NA	-
XTROP0001S00031150	292386	ENSXETG00000023143	8	liver late down			-2.237		Hypothetical LOC496662. [Source:UniProtKB/TrEMBL;Acc:Q5M8X7]	NA	NA	NA	NA	-
XTROP0001S00026391	292473	ENSXETG00000011117	3	liver late down			-1.978		NA	IPR001128,Cytochrome P450;IPR002401,E-class P450, group I	Unspecific monooxygenase.	KOG0156|Cytochrome P450 CYP2 subfamily|Secondary metabolites biosynthesis, transport and catabolism |METABOLISM	NA	-
XTROP0001S00033413	292473	ENSXETG00000011117	3	liver late down			-2.138		NA	IPR001128,Cytochrome P450;IPR002401,E-class P450, group I	Unspecific monooxygenase.	KOG0156|Cytochrome P450 CYP2 subfamily|Secondary metabolites biosynthesis, transport and catabolism |METABOLISM	NA	-
XTROP0001S00033414	292473	ENSXETG00000011117	8	liver late down			-1.96		NA	IPR001128,Cytochrome P450;IPR002401,E-class P450, group I	Unspecific monooxygenase.	KOG0156|Cytochrome P450 CYP2 subfamily|Secondary metabolites biosynthesis, transport and catabolism |METABOLISM	NA	-
XTROP0001S00004622	292474	ENSXETG00000026926	8	liver late down			-1.318		LOC619584 protein (Fragment). [Source:UniProtKB/TrEMBL;Acc:Q5BIY9]	IPR001128,Cytochrome P450;IPR002401,E-class P450, group I	Unspecific monooxygenase.	KOG0156|Cytochrome P450 CYP2 subfamily|Secondary metabolites biosynthesis, transport and catabolism |METABOLISM	NA	-
XTROP0001S00025395	292666	ENSXETG00000000907	8	liver late down			-1.345		NA	IPR007866,Protein of unknown function DUF714	NA	KOG3944|Uncharacterized conserved protein|Function unknown |POORLY CHARACTERIZED	NA	-
XTROP0001S00002982	292740	ENSXETG00000010457	8	liver late down			-1.806		MGC89174 protein. [Source:UniProtKB/TrEMBL;Acc:Q6DF15]	IPR001327,FAD-dependent pyridine nucleotide-disulphide oxidoreductase;IPR000960,Flavin-containing monooxygenase FMO;IPR002253,Flavin-containing monooxygenase (FMO) 1;IPR002257,Flavin-containing monooxygenase (FMO) 5;IPR000566,Lipocalin-related protein and Bos/Can/Equ allergen	Dimethylaniline monooxygenase (N-oxide forming).	KOG1399|Flavin-containing monooxygenase|Secondary metabolites biosynthesis, transport and catabolism |METABOLISM	NA	-
XTROP0001S00019109	292741	ENSXETG00000010456	8	liver late down			-3.839		Fmo3-prov protein. [Source:UniProtKB/TrEMBL;Acc:Q5BKK2]	IPR001327,FAD-dependent pyridine nucleotide-disulphide oxidoreductase;IPR000960,Flavin-containing monooxygenase FMO;IPR001100,Pyridine nucleotide-disulphide oxidoreductase, class I;IPR002253,Flavin-containing monooxygenase (FMO) 1	Dimethylaniline monooxygenase (N-oxide forming).	KOG1399|Flavin-containing monooxygenase|Secondary metabolites biosynthesis, transport and catabolism |METABOLISM	NA	-
XTROP0001S00015092	292812	ENSXETG00000016442	8	liver late down			-1.189		MGC107841 protein. [Source:UniProtKB/TrEMBL;Acc:Q5BKM7]	IPR006090,Acyl-CoA dehydrogenase, C-terminal;IPR006091,Acyl-CoA dehydrogenase, central region	With other acceptors.	NA	NA	-
XTROP0001S00031980	293021	ENSXETG00000011164	8	liver late down			-3.251		MGC107857 protein. [Source:UniProtKB/TrEMBL;Acc:Q5BKM0]	IPR002085,Zinc-containing alcohol dehydrogenase superfamily;IPR002328,Zinc-containing alcohol dehydrogenase;IPR000923,Blue (type 1) copper domain	Alcohol dehydrogenase.	NA	NA	-
XTROP0001S00034684	293310	NA	8	liver late down			-2.661		NA	IPR002502,N-acetylmuramoyl-L-alanine amidase, family 2;IPR006619,Animal peptidoglycan recognition protein PGRP	NA	NA	NA	-
XTROP0001S00002282	293405	ENSXETG00000000088	8	liver late down			-1.55		Abhydrolase domain-containing protein 14B (EC 3.-.-.-)(CCG1-interacting factor B) [Source:UniProtKB/Swiss-Prot;Acc:Q96IU4]	IPR000379,Esterase/lipase/thioesterase	NA	NA	NA	-
XTROP0001S00000477	293580	ENSXETG00000006146	3	liver late down			-1.161		Peroxisomal leader peptide-processing protease (EC 3.4.21.-)(Trypsin domain-containing protein 1) [Contains Peroxisomal leader peptide-processing protease, 10 kDa form;Peroxisomal leader peptide-processing protease, 49 kDa form] [Source:UniProtKB/Swiss-Prot;Acc:Q2T9J0]	IPR008256,Peptidase S1B, glutamyl endopeptidase I;IPR001254,Peptidase S1, chymotrypsin;IPR000194,H+-transporting two-sector ATPase, alpha/beta subunit, central region	NA	NA	NA	-
XTROP0001S00061559	293580	ENSXETG00000006146	8	liver late down			-1.27		Peroxisomal leader peptide-processing protease (EC 3.4.21.-)(Trypsin domain-containing protein 1) [Contains Peroxisomal leader peptide-processing protease, 10 kDa form;Peroxisomal leader peptide-processing protease, 49 kDa form] [Source:UniProtKB/Swiss-Prot;Acc:Q2T9J0]	IPR008256,Peptidase S1B, glutamyl endopeptidase I;IPR001254,Peptidase S1, chymotrypsin;IPR000194,H+-transporting two-sector ATPase, alpha/beta subunit, central region	NA	NA	NA	-
XTROP0001S00005851	293787	NA	8	liver late down			-1.079		NA	IPR000379,Esterase/lipase/thioesterase	NA	KOG1552|Predicted alpha/beta hydrolase|General function prediction only |POORLY CHARACTERIZED	NA	-
XTROP0001S00034962	293803	ENSXETG00000002964	8	liver late down			-1.502		MGC107972 protein. [Source:UniProtKB/TrEMBL;Acc:Q5FVZ2]	IPR002383,Coagulation factor, Gla region;IPR001314,Peptidase S1A, chymotrypsin;IPR006209,EGF-like;IPR001254,Peptidase S1, chymotrypsin;IPR000294,Vitamin K-dependent carboxylation/gamma-carboxyglutamic region;IPR001881,EGF-like calcium-binding;IPR006210,Type I EGF;NULL,NULL;IPR000152,Aspartic acid and asparagine hydroxylation site	Protein C (activated).	KOG3627|Trypsin|Amino acid transport and metabolism |METABOLISM	NA	-
XTROP0001S00000590	293990	ENSXETG00000004127	8	liver late down			-1.777		Regucalcin (Senescence marker protein-30). [Source:UniProtKB/TrEMBL;Acc:Q6DF62]	IPR005511,Senescence marker protein-30 (SMP-30);IPR008367,Regucalcin	Gluconolactonase.	NA	NA	-
XTROP0001S00014710	294097	ENSXETG00000025408	8	liver late down			-1.906		Cytochrome P450, family 2, subfamily C, polypeptide 8. [Source:UniProtKB/TrEMBL;Acc:Q6DJ85]	IPR001128,Cytochrome P450;IPR002401,E-class P450, group I	With reduced flavin or flavoprotein as one donor, and	NA	NA	-
XTROP0001S00061673	294173	NA	3	liver late down			-1.546		NA	IPR008661,L6 membrane	NA	NA	NA	-
XTROP0001S00001214	294173	ENSXETG00000016019	8	liver late down			-1.955		Transmembrane 4 superfamily member 4. [Source:UniProtKB/TrEMBL;Acc:Q6P8F0]	IPR008661,L6 membrane	NA	NA	NA	-
XTROP0001S00007269	294449	ENSXETG00000022375	8	liver late down			-1.375		NA	IPR001858,Phosphatidylethanolamine-binding protein;IPR008914,PEBP	NA	KOG3346|Phosphatidylethanolamine binding protein|General function prediction only |POORLY CHARACTERIZED	NA	-
XTROP0001S00064048	294875	ENSXETG00000013724	3	liver late down			-1.546		Hypothetical LOC496750. [Source:UniProtKB/TrEMBL;Acc:Q5M8H9]	IPR001440,TPR repeat	NA	NA	NA	-
XTROP0001S00032111	294928	ENSXETG00000000036	3	liver late down			-1.188		Enoyl Coenzyme A hydratase 1, peroxisomal. [Source:UniProtKB/TrEMBL;Acc:Q6DJA5]	IPR001753,Enoyl-CoA hydratase/isomerase	Transposing C==C bonds.	NA	1170|catalytic activity|molecular_function|GO:0003824; 4804|metabolism|biological_process|GO:0008152; 238|C-8 sterol isomerase activity|molecular_function|GO:0000247; 5054|delta5-delta2,4-dienoyl-CoA isomerase activity|molecular_function|GO:0008416; 8590|intramolecular oxidoreductase activity, transposing C=C bonds|molecular_function|GO:0016863; 9683|3-carboxymuconate cycloisomerase type II activ…	-
XTROP0001S00032113	294928	ENSXETG00000000036	3	liver late down			-1.317		Enoyl Coenzyme A hydratase 1, peroxisomal. [Source:UniProtKB/TrEMBL;Acc:Q6DJA5]	IPR001753,Enoyl-CoA hydratase/isomerase	Transposing C==C bonds.	NA	1170|catalytic activity|molecular_function|GO:0003824; 4804|metabolism|biological_process|GO:0008152; 238|C-8 sterol isomerase activity|molecular_function|GO:0000247; 5054|delta5-delta2,4-dienoyl-CoA isomerase activity|molecular_function|GO:0008416; 8590|intramolecular oxidoreductase activity, transposing C=C bonds|molecular_function|GO:0016863; 9683|3-carboxymuconate cycloisomerase type II activ…	-
XTROP0001S00001028	294995	ENSXETG00000009671	8	liver late down			-3.395		Cytochrome P450 2B6 (EC 1.14.14.1) (CYPIIB6) (P450 IIB1). [Source:UniProtKB/Swiss-Prot;Acc:P20813] [from human gene ENSG00000197408]	IPR001128,Cytochrome P450;IPR002401,E-class P450, group I;IPR008067,E-class P450, CYP2A	Unspecific monooxygenase.	NA	3218|electron transport|biological_process|GO:0006118; 1783|monooxygenase activity|molecular_function|GO:0004497; 8444|oxidoreductase activity, acting on paired donors, with incorporation or reduction of molecular oxygen, reduced flavin or flavoprotein as one donor, and incorporation of one atom of oxygen|molecular_function|GO:0016712;17878|unspecific monooxygenase activity|molecular_function|GO:…	-
XTROP0001S00018582	295047	ENSXETG00000021554	8	liver late down			-1.416		GTP cyclohydrolase I feedback regulatory protein (GFRP). [Source:UniProtKB/Swiss-Prot;Acc:Q6NVA8]	IPR009112,GTP cyclohydrolase I feedback regulatory protein	NA	NA	NA	-
XTROP0001S00018399	295055	ENSXETG00000017941	8	liver late down			-1.451		Matrix metalloproteinase-26 Precursor (MMP-26)(EC 3.4.24.-)(Matrilysin-2)(Endometase) [Source:UniProtKB/Swiss-Prot;Acc:Q9NRE1]	IPR001818,Peptidase M10A and M12B, matrixin and adamalysin;IPR000585,Hemopexin;IPR006026,Peptidase, metallopeptidases;IPR006025,Peptidase M, neutral zinc metallopeptidases, zinc-binding site	Stromelysin 1.	KOG1565|Gelatinase A and related matrix metalloproteases|Extracellular structures |CELLULAR PROCESSES AND SIGNALING;KOG1565|Gelatinase A and related matrix metalloproteases|Posttranslational modification, protein turnover, chaperones |CELLULAR PROCESSES AND SIGNALING	1549|metalloendopeptidase activity|molecular_function|GO:0004222; 2702|extracellular matrix (sensu Metazoa)|cellular_component|GO:0005578; 3588|proteolysis and peptidolysis|biological_process|GO:0006508; 4883|metallopeptidase activity|molecular_function|GO:0008237; 4913|zinc ion binding|molecular_function|GO:0008270; 1569|stromelysin 1 activity|molecular_function|GO:0004248;11116|stromelysin 2 ac…	-
XTROP0001S00024219	295626	ENSXETG00000002499	8	liver late down			-1.189		Apolipoprotein M (Apo-M)(ApoM)(Protein G3a) [Source:UniProtKB/Swiss-Prot;Acc:O95445]	NA	NA	NA	NA	-
XTROP0001S00015645	295905	NA	3	liver late down			-1.632		NA	IPR002473,Small chemokine, C-X-C/Interleukin 8;IPR001811,Small chemokine, interleukin-8-like	NA	NA	2700|extracellular region|cellular_component|GO:0005576; 4010|immune response|biological_process|GO:0006955; 4671|chemokine activity|molecular_function|GO:0008009; 2365|cytokine activity|molecular_function|GO:0005125	-
XTROP0001S00062844	295905	NA	8	liver late down			-1.508		NA	IPR002473,Small chemokine, C-X-C/Interleukin 8;IPR001811,Small chemokine, interleukin-8-like	NA	NA	2700|extracellular region|cellular_component|GO:0005576; 4010|immune response|biological_process|GO:0006955; 4671|chemokine activity|molecular_function|GO:0008009; 2365|cytokine activity|molecular_function|GO:0005125	-
XTROP0001S00009232	295963	ENSXETG00000018709	3	liver late down			-2.177		MGC79796 protein. [Source:UniProtKB/TrEMBL;Acc:Q6DFM6]	IPR002213,UDP-glucuronosyl/UDP-glucosyltransferase	NA	NA	4804|metabolism|biological_process|GO:0008152; 8488|transferase activity, transferring hexosyl groups|molecular_function|GO:0016758	-
XTROP0001S00061393	295963	ENSXETG00000009055	8	liver late down			-1.137		UDP glycosyltransferase 3 family, polypeptide A2 [Source:RefSeq_peptide;Acc:NP_777574] [from human gene ENSG00000168671]	IPR002213,UDP-glucuronosyl/UDP-glucosyltransferase	NA	NA	4804|metabolism|biological_process|GO:0008152; 8488|transferase activity, transferring hexosyl groups|molecular_function|GO:0016758	-
XTROP0001S00027253	296103	ENSXETG00000008191	8	liver late down			-1.081		6-pyruvoyl-tetrahydropterin synthase/dimerization cofactor of hepatocyte nuclear factor 1 alpha (TCF1). [Source:UniProtKB/TrEMBL;Acc:Q640A1]	IPR001533,Transcriptional coactivator/pterin dehydratase	NA	NA	NA	-
XTROP0001S00011494	296260	ENSXETG00000020033	8	liver late down			-2.283		MGC89905 protein. [Source:UniProtKB/TrEMBL;Acc:Q66IF8]	IPR000215,Proteinase inhibitor I4, serpin	NA	NA	2128|serine-type endopeptidase inhibitor activity|molecular_function|GO:0004867	-
XTROP0001S00009195	296606	ENSXETG00000022308	3	liver late down			-2.003		D-amino-acid oxidase (DAMOX)(DAAO)(DAO)(EC 1.4.3.3) [Source:UniProtKB/Swiss-Prot;Acc:P14920]	IPR006076,FAD dependent oxidoreductase;IPR001412,Aminoacyl-tRNA synthetase, class I;IPR006181,D-amino acid oxidase	D-amino acid oxidase.	KOG3923|D-aspartate oxidase|Amino acid transport and metabolism |METABOLISM	2074|tRNA ligase activity|molecular_function|GO:0004812; 2653|ATP binding|molecular_function|GO:0005524; 3508|tRNA aminoacylation for protein translation|biological_process|GO:0006418; 3218|electron transport|biological_process|GO:0006118; 8235|oxidoreductase activity|molecular_function|GO:0016491; 1230|D-amino-acid oxidase activity|molecular_function|GO:0003884	-
XTROP0001S00040426	296606	ENSXETG00000022308	8	liver late down			-1.966		D-amino-acid oxidase (DAMOX)(DAAO)(DAO)(EC 1.4.3.3) [Source:UniProtKB/Swiss-Prot;Acc:P14920]	IPR006076,FAD dependent oxidoreductase;IPR001412,Aminoacyl-tRNA synthetase, class I;IPR006181,D-amino acid oxidase	D-amino acid oxidase.	KOG3923|D-aspartate oxidase|Amino acid transport and metabolism |METABOLISM	2074|tRNA ligase activity|molecular_function|GO:0004812; 2653|ATP binding|molecular_function|GO:0005524; 3508|tRNA aminoacylation for protein translation|biological_process|GO:0006418; 3218|electron transport|biological_process|GO:0006118; 8235|oxidoreductase activity|molecular_function|GO:0016491; 1230|D-amino-acid oxidase activity|molecular_function|GO:0003884	-
XTROP0001S00002303	296713	ENSXETG00000027622	8	liver late down			-2.153		MGC69505 protein. [Source:UniProtKB/TrEMBL;Acc:Q6GLF0]	IPR001804,Isocitrate/isopropylmalate dehydrogenase;IPR004790,Isocitrate dehydrogenase NADP-dependent, eukaryotic;IPR002155,Thiolase	Isocitrate dehydrogenase (NADP+).	KOG1526|NADP-dependent isocitrate dehydrogenase|Energy production and conversion |METABOLISM	4804|metabolism|biological_process|GO:0008152; 8235|oxidoreductase activity|molecular_function|GO:0016491; 1739|isocitrate dehydrogenase (NADP+) activity|molecular_function|GO:0004450; 3194|main pathways of carbohydrate metabolism|biological_process|GO:0006092; 1737|isocitrate dehydrogenase activity|molecular_function|GO:0004448	-
XTROP0001S00017036	297623	ENSXETG00000003981	8	liver late down			-2.743		LOC548403 protein (Fragment). [Source:UniProtKB/TrEMBL;Acc:Q5CZZ3]	IPR002226,Catalase	Catalase.	NA	1425|catalase activity|molecular_function|GO:0004096; 3218|electron transport|biological_process|GO:0006118; 4033|response to oxidative stress|biological_process|GO:0006979	-
XTROP0001S00015600	298193	ENSXETG00000017277	8	liver late down			-1.424		ATP-binding cassette sub-family F member 3 [Source:UniProtKB/Swiss-Prot;Acc:Q9NUQ8]	IPR003439,ABC transporter;IPR001392,Clathrin adaptor complex, medium chain;IPR003593,AAA ATPase;IPR001687,ATP/GTP-binding site motif A (P-loop)	NA	NA	3946|intracellular protein transport|biological_process|GO:0006886;10941|clathrin vesicle coat|cellular_component|GO:0030125; 2653|ATP binding|molecular_function|GO:0005524; 8614|ATPase activity|molecular_function|GO:0016887; 157|nucleotide binding|molecular_function|GO:0000166; 8812|nucleoside-triphosphatase activity|molecular_function|GO:0017111	-
XTROP0001S00022419	298945	NA	8	liver late down			-2.129		NA	IPR001680,G-protein beta WD-40 repeat;IPR005108,HELP;IPR002048,Calcium-binding EF-hand	NA	NA	NA	-
XTROP0001S00026724	299598	ENSXETG00000019385	8	liver late down			-1.909		Hypothetical LOC496731. [Source:UniProtKB/TrEMBL;Acc:Q5M8J9]	IPR000010,Proteinase inhibitor I25, cystatin	NA	NA	NA	-
XTROP0001S00003463	300151	ENSXETG00000017659	8	liver late down			-1.14		Serine dehydratase-like. [Source:UniProtKB/TrEMBL;Acc:Q5M8H3]	IPR001926,Pyridoxal-5'-phosphate-dependent enzyme, beta subunit	NA	KOG1250|Threonine/serine dehydratases|Amino acid transport and metabolism |METABOLISM	1170|catalytic activity|molecular_function|GO:0003824; 4804|metabolism|biological_process|GO:0008152; 1281|L-serine ammonia-lyase activity|molecular_function|GO:0003941	-
XTROP0001S00011082	300314	ENSXETG00000018616	8	liver late down			-1.809		Hyaluronan-binding protein 2 Precursor (EC 3.4.21.-)(Plasma hyaluronan-binding protein)(Hepatocyte growth factor activator-like protein)(Factor VII-activating protease)(Factor seven-activating protease)(FSAP) [Contains Hyaluronan-binding protein 2 50 kDa heavy chain;Hyaluronan-binding protein 2 50 kDa heavy chain alternate form;Hyaluronan-binding protein 2 27 kDa light chain;Hyaluronan-binding pr…	IPR000001,Kringle;IPR001314,Peptidase S1A, chymotrypsin;IPR006209,EGF-like;IPR001254,Peptidase S1, chymotrypsin;IPR006210,Type I EGF	U-plasminogen activator.	NA	1596|trypsin activity|molecular_function|GO:0004295; 3588|proteolysis and peptidolysis|biological_process|GO:0006508; 1579|chymotrypsin activity|molecular_function|GO:0004263; 4889|plasminogen activator activity|molecular_function|GO:0008243	-
XTROP0001S00006935	301060	ENSXETG00000023236	8	liver late down			-3.2		MGC108373 protein. [Source:UniProtKB/TrEMBL;Acc:Q5EBE5]	IPR001464,Annexin;IPR002392,Annexin, type V	Glycerophosphoinositol inositolphosphodiesterase.	NA	2641|calcium ion binding|molecular_function|GO:0005509; 2670|calcium-dependent phospholipid binding|molecular_function|GO:0005544;18315|negative regulation of coagulation|biological_process|GO:0050819;16386|glycerophosphoinositol inositolphosphodiesterase activity|molecular_function|GO:0047394	-
XTROP0001S00044224	301118	ENSXETG00000016947	3	liver late down			-1.215		Lathosterol oxidase (EC 1.14.21.6)(Lathosterol 5-desaturase)(Delta(7)-sterol 5-desaturase)(C-5 sterol desaturase)(Sterol-C5-desaturase) [Source:UniProtKB/Swiss-Prot;Acc:O75845]	IPR006088,Sterol desaturase;IPR006087,SUR2-type hydroxylase/desaturase, catalytic region	Lathosterol oxidase.	NA	1170|catalytic activity|molecular_function|GO:0003824; 4804|metabolism|biological_process|GO:0008152;17543|lathosterol oxidase activity|molecular_function|GO:0050046	-
XTROP0001S00008463	301118	ENSXETG00000016947	8	liver late down			-1.179		Lathosterol oxidase (EC 1.14.21.6)(Lathosterol 5-desaturase)(Delta(7)-sterol 5-desaturase)(C-5 sterol desaturase)(Sterol-C5-desaturase) [Source:UniProtKB/Swiss-Prot;Acc:O75845]	IPR006088,Sterol desaturase;IPR006087,SUR2-type hydroxylase/desaturase, catalytic region	Lathosterol oxidase.	NA	1170|catalytic activity|molecular_function|GO:0003824; 4804|metabolism|biological_process|GO:0008152;17543|lathosterol oxidase activity|molecular_function|GO:0050046	-
XTROP0001S00000483	301734	NA	8	liver late down			-1.545		NA	IPR001128,Cytochrome P450;IPR002401,E-class P450, group I	Unspecific monooxygenase.	NA	3218|electron transport|biological_process|GO:0006118; 1783|monooxygenase activity|molecular_function|GO:0004497;17878|unspecific monooxygenase activity|molecular_function|GO:0050381	-
XTROP0001S00009628	301767	ENSXETG00000020010	8	liver late down			-1.19		NA	NA	With NAD(+) or NADP(+) as acceptor.	KOG1262|FAD-binding protein DIMINUTO|General function prediction only |POORLY CHARACTERIZED	8366|oxidoreductase activity, acting on the CH-CH group of donors, NAD or NADP as acceptor|molecular_function|GO:0016628; 8369|enoyl-[acyl-carrier protein] reductase activity|molecular_function|GO:0016631; 9351|2,3-dihydroxy-2,3-dihydro-phenylpropionate dehydrogenase activity|molecular_function|GO:0018498; 9352|cis-2,3-dihydrodiol DDT dehydrogenase activity|molecular_function|GO:0018499; 9353|tra…	-
XTROP0001S00034201	302383	ENSXETG00000025063	3	liver late down			-1.688		NA	IPR000863,Sulfotransferase	Sulfotransferases.	NA	NA	-
XTROP0001S00037641	303024	ENSXETG00000009215	8	liver late down			-1.383		Leucine-rich repeat-containing protein 31 [Source:UniProtKB/Swiss-Prot;Acc:Q6UY01]	IPR001611,Leucine-rich repeat;NULL,NULL;IPR003590,Leucine-rich repeat, ribonuclease inhibitor subtype;IPR007091,Leucine-rich repeat, ribonuclease inhibitor type	NA	KOG4308|LRR-containing protein|Function unknown |POORLY CHARACTERIZED	NA	-
XTROP0001S00020984	304512	ENSXETG00000008633	8	liver late down			-1.635		NA	IPR002111,Cation (not K+) channel, TM region	NA	KOG3733|Mucolipidin and related proteins (TRML subfamily of transient receptor potential proteins)|Inorganic ion transport and metabolism |METABOLISM	NA	-
XTROP0001S00017286	304536	ENSXETG00000003085	8	liver late down			-2.324		Lecithin-cholesterol acyltransferase. [Source:UniProtKB/TrEMBL;Acc:Q6DJ79]	IPR003386,Lecithin:cholesterol acyltransferase;IPR000379,Esterase/lipase/thioesterase	NA	KOG2369|Lecithin:cholesterol acyltransferase (LCAT)/Acyl-ceramide synthase|Lipid transport and metabolism |METABOLISM	NA	-
XTROP0001S00019083	304813	ENSXETG00000008282	8	liver late down			-1.193		Long-chain fatty acid transport protein 6 (Fatty acid transport protein 6)(FATP-6)(Very long-chain acyl-CoA synthetase homolog 1)(hVLCS-H1)(VLCSH1)(Fatty-acid-coenzyme A ligase, very long-chain 2)(Solute carrier family 27 member 6) [Source:UniProtKB/Swiss-Prot;Acc:Q9Y2P4]	IPR000873,AMP-dependent synthetase and ligase	Acid--thiol ligases.	NA	NA	-
XTROP0001S00013867	304819	ENSXETG00000005191	8	liver late down			-1.333		NA	IPR002086,Aldehyde dehydrogenase	Aldehyde dehydrogenase (NAD+).	NA	NA	-
XTROP0001S00014416	309350	ENSXETG00000012973	8	liver late down			-0.994		Aminopeptidase N (hAPN)(EC 3.4.11.2)(Alanyl aminopeptidase)(Microsomal aminopeptidase)(Aminopeptidase M)(gp150)(Myeloid plasma membrane glycoprotein CD13)(CD13 antigen) [Source:UniProtKB/Swiss-Prot;Acc:P15144]	IPR001930,Peptidase M1, membrane alanine aminopeptidase;IPR006025,Peptidase M, neutral zinc metallopeptidases, zinc-binding site	Membrane alanine aminopeptidase.	KOG1046|Puromycin-sensitive aminopeptidase and related aminopeptidases|Posttranslational modification, protein turnover, chaperones |CELLULAR PROCESSES AND SIGNALING;KOG1046|Puromycin-sensitive aminopeptidase and related aminopeptidases|Amino acid transport and metabolism |METABOLISM	NA	-
XTROP0001S00027237	310689	ENSXETG00000022745	8	liver late down			-2.708		Hypothetical LOC496472. [Source:UniProtKB/TrEMBL;Acc:Q5XH81]	IPR002048,Calcium-binding EF-hand	NA	NA	NA	-
XTROP0001S00012979	312161	ENSXETG00000001281	8	liver late down			-1.449		Lysosomal alpha-glucosidase Precursor (EC 3.2.1.20)(Acid maltase)(Aglucosidase alfa) [Contains 76 kDa lysosomal alpha-glucosidase;70 kDa lysosomal alpha-glucosidase] [Source:UniProtKB/Swiss-Prot;Acc:P10253]	IPR000519,P-type trefoil	NA	NA	NA	-
XTROP0001S00016128	314326	ENSXETG00000010546	3	liver late down			-1.515		GDNF family receptor alpha-2 Precursor (GFR-alpha-2)(Neurturin receptor alpha)(NRTNR-alpha)(NTNR-alpha)(TGF-beta-related neurotrophic factor receptor 2)(GDNF receptor beta)(GDNFR-beta)(RET ligand 2) [Source:UniProtKB/Swiss-Prot;Acc:O00451]	IPR003438,Glial cell line-derived neurotrophic factor receptor	NA	NA	2132|receptor activity|molecular_function|GO:0004872	-
XTROP0001S00034610	314326	ENSXETG00000010546	8	liver late down			-1.928		GDNF family receptor alpha-2 Precursor (GFR-alpha-2)(Neurturin receptor alpha)(NRTNR-alpha)(NTNR-alpha)(TGF-beta-related neurotrophic factor receptor 2)(GDNF receptor beta)(GDNFR-beta)(RET ligand 2) [Source:UniProtKB/Swiss-Prot;Acc:O00451]	IPR003438,Glial cell line-derived neurotrophic factor receptor	NA	NA	2132|receptor activity|molecular_function|GO:0004872	-
XTROP0001S00020314	315648	NA	8	liver late down			-1.296		NA	IPR007114,Major facilitator superfamily;IPR000849,GlpT transporter	NA	KOG2533|Permease of the major facilitator superfamily|Carbohydrate transport and metabolism |METABOLISM	2450|transporter activity|molecular_function|GO:0005215; 3879|transport|biological_process|GO:0006810; 7827|integral to membrane|cellular_component|GO:0016021	-
XTROP0001S00023710	317446	NA	8	liver late down			-1.352		NA	IPR006209,EGF-like;IPR002860,Glycosyl hydrolase, BNR repeat;IPR006210,Type I EGF	Serine endopeptidases.	NA	NA	-
XTROP0001S00021937	319855	ENSXETG00000003032	8	liver late down			-1.548		Beta-galactoside alpha-2,6-sialyltransferase 1 (EC 2.4.99.1)(CMP-N-acetylneuraminate-beta-galactosamide-alpha-2,6-sialyltransferase 1)(Alpha 2,6-ST)(Sialyltransferase 1)(ST6Gal I)(B-cell antigen CD75) [Source:UniProtKB/Swiss-Prot;Acc:P15907]	IPR001675,Glycosyl transferase, family 29	Beta-galactosamide alpha-2,6-sialyltransferase.	NA	2909|Golgi apparatus|cellular_component|GO:0005794; 3567|protein amino acid glycosylation|biological_process|GO:0006486; 5012|sialyltransferase activity|molecular_function|GO:0008373; 7826|membrane|cellular_component|GO:0016020; 1181|beta-galactoside alpha-2,6-sialyltransferase activity|molecular_function|GO:0003835	-
XTROP0001S00033387	319955	ENSXETG00000012148	3	liver late down			-1.877		NA	IPR006680,Amidohydrolase;IPR002195,Dihydroorotase	Allantoinase.	NA	8539|hydrolase activity, acting on carbon-nitrogen (but not peptide) bonds, in cyclic amides|molecular_function|GO:0016812; 8516|hydrolase activity|molecular_function|GO:0016787; 1370|allantoinase activity|molecular_function|GO:0004038	-
XTROP0001S00033388	319955	ENSXETG00000012148	3	liver late down			-1.635		NA	IPR006680,Amidohydrolase;IPR002195,Dihydroorotase	Allantoinase.	NA	8539|hydrolase activity, acting on carbon-nitrogen (but not peptide) bonds, in cyclic amides|molecular_function|GO:0016812; 8516|hydrolase activity|molecular_function|GO:0016787; 1370|allantoinase activity|molecular_function|GO:0004038	-
XTROP0001S00013150	319955	ENSXETG00000012148	8	liver late down			-2.226		NA	IPR006680,Amidohydrolase;IPR002195,Dihydroorotase	Allantoinase.	NA	8539|hydrolase activity, acting on carbon-nitrogen (but not peptide) bonds, in cyclic amides|molecular_function|GO:0016812; 8516|hydrolase activity|molecular_function|GO:0016787; 1370|allantoinase activity|molecular_function|GO:0004038	-
XTROP0001S00057000	320335	ENSXETG00000004961	3	liver late down			-1.95		Aromatic-L-amino-acid decarboxylase (AADC)(EC 4.1.1.28)(DOPA decarboxylase)(DDC) [Source:UniProtKB/Swiss-Prot;Acc:P20711]	IPR010977,Aromatic-L-amino-acid decarboxylase;IPR002129,Pyridoxal-dependent decarboxylase	Aromatic-L-amino-acid decarboxylase.	KOG0628|Aromatic-L-amino-acid/L-histidine decarboxylase|Amino acid transport and metabolism |METABOLISM	3599|amino acid metabolism|biological_process|GO:0006520; 8558|carboxy-lyase activity|molecular_function|GO:0016831; 3598|amino acid and derivative metabolism|biological_process|GO:0006519; 1389|aromatic-L-amino-acid decarboxylase activity|molecular_function|GO:0004058	-
XTROP0001S00024345	320877	ENSXETG00000001833	8	liver late down			-1.223		Transmembrane protein 131-like Precursor [Source:UniProtKB/Swiss-Prot;Acc:A2VDJ0]	NA	NA	KOG3620|Uncharacterized conserved protein|Function unknown |POORLY CHARACTERIZED	NA	-
XTROP0001S00026773	321371	ENSXETG00000026928	8	liver late down			-1.904		NA	IPR001128,Cytochrome P450;IPR002401,E-class P450, group I	With reduced flavin or flavoprotein as one donor, and	NA	3218|electron transport|biological_process|GO:0006118; 1783|monooxygenase activity|molecular_function|GO:0004497; 8444|oxidoreductase activity, acting on paired donors, with incorporation or reduction of molecular oxygen, reduced flavin or flavoprotein as one donor, and incorporation of one atom of oxygen|molecular_function|GO:0016712; 9530|dibenzothiophene-5,5-dioxide monooxygenase activity|mole…	-
XTROP0001S00005170	321373	ENSXETG00000026926	8	liver late down			-1.649		LOC619584 protein (Fragment). [Source:UniProtKB/TrEMBL;Acc:Q5BIY9]	IPR002401,E-class P450, group I;IPR008069,E-class P450, CYP2D;IPR001128,Cytochrome P450	Unspecific monooxygenase.	NA	3218|electron transport|biological_process|GO:0006118; 1783|monooxygenase activity|molecular_function|GO:0004497; 8444|oxidoreductase activity, acting on paired donors, with incorporation or reduction of molecular oxygen, reduced flavin or flavoprotein as one donor, and incorporation of one atom of oxygen|molecular_function|GO:0016712;17878|unspecific monooxygenase activity|molecular_function|GO:…	-
XTROP0001S00010021	321381	ENSXETG00000026925	8	liver late down			-1.361		NA	IPR001128,Cytochrome P450;IPR002401,E-class P450, group I;IPR008069,E-class P450, CYP2D	Unspecific monooxygenase.	NA	3218|electron transport|biological_process|GO:0006118; 1783|monooxygenase activity|molecular_function|GO:0004497; 8444|oxidoreductase activity, acting on paired donors, with incorporation or reduction of molecular oxygen, reduced flavin or flavoprotein as one donor, and incorporation of one atom of oxygen|molecular_function|GO:0016712;17878|unspecific monooxygenase activity|molecular_function|GO:…	-
XTROP0001S00023773	321409	NA	8	liver late down			-1.4		NA	IPR001128,Cytochrome P450;IPR002401,E-class P450, group I	Unspecific monooxygenase.	KOG0156|Cytochrome P450 CYP2 subfamily|Secondary metabolites biosynthesis, transport and catabolism |METABOLISM	3218|electron transport|biological_process|GO:0006118; 1783|monooxygenase activity|molecular_function|GO:0004497;17878|unspecific monooxygenase activity|molecular_function|GO:0050381	-
XTROP0001S00008275	321496	NA	8	liver late down			-1.616		NA	IPR001128,Cytochrome P450;IPR002401,E-class P450, group I	Unspecific monooxygenase.	KOG0156|Cytochrome P450 CYP2 subfamily|Secondary metabolites biosynthesis, transport and catabolism |METABOLISM	3218|electron transport|biological_process|GO:0006118; 1783|monooxygenase activity|molecular_function|GO:0004497;17878|unspecific monooxygenase activity|molecular_function|GO:0050381	-
XTROP0001S00024650	321511	NA	8	liver late down			-1.142		NA	IPR001128,Cytochrome P450;IPR002401,E-class P450, group I	With reduced flavin or flavoprotein as one donor, and	KOG0156|Cytochrome P450 CYP2 subfamily|Secondary metabolites biosynthesis, transport and catabolism |METABOLISM	3218|electron transport|biological_process|GO:0006118; 1783|monooxygenase activity|molecular_function|GO:0004497; 8444|oxidoreductase activity, acting on paired donors, with incorporation or reduction of molecular oxygen, reduced flavin or flavoprotein as one donor, and incorporation of one atom of oxygen|molecular_function|GO:0016712; 9530|dibenzothiophene-5,5-dioxide monooxygenase activity|mole…	-
XTROP0001S00023921	321563	NA	8	liver late down			-1.426		NA	IPR001128,Cytochrome P450;IPR002401,E-class P450, group I	Unspecific monooxygenase.	KOG0156|Cytochrome P450 CYP2 subfamily|Secondary metabolites biosynthesis, transport and catabolism |METABOLISM	3218|electron transport|biological_process|GO:0006118; 1783|monooxygenase activity|molecular_function|GO:0004497;17878|unspecific monooxygenase activity|molecular_function|GO:0050381	-
XTROP0001S00004301	321631	NA	8	liver late down			-1.78		NA	IPR001128,Cytochrome P450;IPR002401,E-class P450, group I	With reduced flavin or flavoprotein as one donor, and	NA	3218|electron transport|biological_process|GO:0006118; 1783|monooxygenase activity|molecular_function|GO:0004497; 8444|oxidoreductase activity, acting on paired donors, with incorporation or reduction of molecular oxygen, reduced flavin or flavoprotein as one donor, and incorporation of one atom of oxygen|molecular_function|GO:0016712; 9530|dibenzothiophene-5,5-dioxide monooxygenase activity|mole…	-
XTROP0001S00003486	321643	ENSXETG00000011098	8	liver late down			-1.369		NA	IPR001128,Cytochrome P450;IPR002401,E-class P450, group I;IPR000719,Protein kinase	Unspecific monooxygenase.	NA	1939|protein kinase activity|molecular_function|GO:0004672; 2653|ATP binding|molecular_function|GO:0005524; 3551|protein amino acid phosphorylation|biological_process|GO:0006468; 3218|electron transport|biological_process|GO:0006118; 1783|monooxygenase activity|molecular_function|GO:0004497;17878|unspecific monooxygenase activity|molecular_function|GO:0050381	-
XTROP0001S00000527	321682	NA	8	liver late down			-1.934		NA	IPR001128,Cytochrome P450;IPR002401,E-class P450, group I	Unspecific monooxygenase.	KOG0156|Cytochrome P450 CYP2 subfamily|Secondary metabolites biosynthesis, transport and catabolism |METABOLISM	3218|electron transport|biological_process|GO:0006118; 1783|monooxygenase activity|molecular_function|GO:0004497;17878|unspecific monooxygenase activity|molecular_function|GO:0050381	-
XTROP0001S00016544	321738	NA	8	liver late down			-1.473		NA	IPR001128,Cytochrome P450;IPR002401,E-class P450, group I	With reduced flavin or flavoprotein as one donor, and	NA	3218|electron transport|biological_process|GO:0006118; 1783|monooxygenase activity|molecular_function|GO:0004497; 8444|oxidoreductase activity, acting on paired donors, with incorporation or reduction of molecular oxygen, reduced flavin or flavoprotein as one donor, and incorporation of one atom of oxygen|molecular_function|GO:0016712; 9530|dibenzothiophene-5,5-dioxide monooxygenase activity|mole…	-
XTROP0001S00009597	321756	NA	8	liver late down			-1.762		NA	IPR001128,Cytochrome P450;IPR002401,E-class P450, group I;IPR008069,E-class P450, CYP2D	Unspecific monooxygenase.	NA	3218|electron transport|biological_process|GO:0006118; 1783|monooxygenase activity|molecular_function|GO:0004497; 8444|oxidoreductase activity, acting on paired donors, with incorporation or reduction of molecular oxygen, reduced flavin or flavoprotein as one donor, and incorporation of one atom of oxygen|molecular_function|GO:0016712;17878|unspecific monooxygenase activity|molecular_function|GO:…	-
XTROP0001S00024121	321808	NA	8	liver late down			-1.493		NA	IPR001128,Cytochrome P450;IPR002401,E-class P450, group I	With reduced flavin or flavoprotein as one donor, and	KOG0156|Cytochrome P450 CYP2 subfamily|Secondary metabolites biosynthesis, transport and catabolism |METABOLISM	3218|electron transport|biological_process|GO:0006118; 1783|monooxygenase activity|molecular_function|GO:0004497; 8444|oxidoreductase activity, acting on paired donors, with incorporation or reduction of molecular oxygen, reduced flavin or flavoprotein as one donor, and incorporation of one atom of oxygen|molecular_function|GO:0016712; 9530|dibenzothiophene-5,5-dioxide monooxygenase activity|mole…	-
XTROP0001S00018517	321817	NA	3	liver late down			-2.046		NA	IPR001128,Cytochrome P450;IPR002401,E-class P450, group I	Unspecific monooxygenase.	NA	3218|electron transport|biological_process|GO:0006118; 1783|monooxygenase activity|molecular_function|GO:0004497;17878|unspecific monooxygenase activity|molecular_function|GO:0050381	-
XTROP0001S00043207	321817	NA	3	liver late down			-1.97		NA	IPR001128,Cytochrome P450;IPR002401,E-class P450, group I	Unspecific monooxygenase.	NA	3218|electron transport|biological_process|GO:0006118; 1783|monooxygenase activity|molecular_function|GO:0004497;17878|unspecific monooxygenase activity|molecular_function|GO:0050381	-
XTROP0001S00049213	321817	NA	8	liver late down			-2.94		NA	IPR001128,Cytochrome P450;IPR002401,E-class P450, group I	Unspecific monooxygenase.	NA	3218|electron transport|biological_process|GO:0006118; 1783|monooxygenase activity|molecular_function|GO:0004497;17878|unspecific monooxygenase activity|molecular_function|GO:0050381	-
XTROP0001S00000315	321869	ENSXETG00000026927	8	liver late down			-1.491		NA	IPR001128,Cytochrome P450;IPR002401,E-class P450, group I	With reduced flavin or flavoprotein as one donor, and	NA	3218|electron transport|biological_process|GO:0006118; 1783|monooxygenase activity|molecular_function|GO:0004497; 8444|oxidoreductase activity, acting on paired donors, with incorporation or reduction of molecular oxygen, reduced flavin or flavoprotein as one donor, and incorporation of one atom of oxygen|molecular_function|GO:0016712; 9530|dibenzothiophene-5,5-dioxide monooxygenase activity|mole…	-
XTROP0001S00012092	322351	ENSXETG00000019843	8	liver late down			-2.352		Dipeptidase 1 Precursor (EC 3.4.13.19)(Microsomal dipeptidase)(Renal dipeptidase)(hRDP)(Dehydropeptidase-I) [Source:UniProtKB/Swiss-Prot;Acc:P16444]	IPR008257,Peptidase M19, renal dipeptidase;NULL,NULL;IPR000180,Peptidase M19, renal dipeptidase, active site	Membrane dipeptidase.	NA	1558|membrane dipeptidase activity|molecular_function|GO:0004237; 3588|proteolysis and peptidolysis|biological_process|GO:0006508; 4885|dipeptidyl-peptidase activity|molecular_function|GO:0008239	-
XTROP0001S00020903	322382	ENSXETG00000019849	8	liver late down			-1.5		NA	IPR000895,Transthyretin	NA	NA	2582|carrier activity|molecular_function|GO:0005386; 2628|steroid binding|molecular_function|GO:0005496; 3879|transport|biological_process|GO:0006810	-
XTROP0001S00003897	324778	ENSXETG00000025024	8	liver late down			-1.103		CYP27B1 protein (Fragment). [Source:UniProtKB/TrEMBL;Acc:Q505H8]	IPR001128,Cytochrome P450;IPR002401,E-class P450, group I;IPR001547,Glycoside hydrolase, family 5	Cholestanetriol 26-monooxygenase.	KOG0159|Cytochrome P450 CYP11/CYP12/CYP24/CYP27 subfamilies|Secondary metabolites biosynthesis, transport and catabolism |METABOLISM	NA	-
XTROP0001S00014930	325570	ENSXETG00000024147	3	liver late down			-1.014		NA	IPR003859,Metazoa galactosyltransferase	NA	NA	NA	-
XTROP0001S00057068	325570	NA	8	liver late down			-1.034		NA	IPR003859,Metazoa galactosyltransferase	NA	NA	NA	-
XTROP0001S00025939	327659	ENSXETG00000015966	8	liver late down			-1.599		Hypothetical protein MGC76130. [Source:UniProtKB/TrEMBL;Acc:Q6P313]	IPR004839,Aminotransferase, class I and II;IPR011282,2-amino-3-ketobutyrate coenzyme A ligase	Glycine C-acetyltransferase.	NA	5660|biosynthesis|biological_process|GO:0009058; 8498|transferase activity, transferring nitrogenous groups|molecular_function|GO:0016769; 5497|glycine C-acetyltransferase activity|molecular_function|GO:0008890	-
XTROP0001S00021808	328232	ENSXETG00000016420	8	liver late down			-1.87		NA	NA	NA	KOG2883|NIPSNAP1 protein|Function unknown |POORLY CHARACTERIZED	NA	-
XTROP0001S00022361	328684	NA	8	liver late down			-1.098		NA	IPR002181,Fibrinogen, beta/gamma chain, C-terminal globular	NA	KOG2579|Ficolin and related extracellular proteins|General function prediction only |POORLY CHARACTERIZED	NA	-
XTROP0001S00017069	329580	ENSXETG00000027130	8	liver late down			-0.936		Bile acid CoA:amino acid N-acyltransferase (EC 2.3.1.65) (BAT) (BACAT) (Glycine N-choloyltransferase) (Long-chain fatty-acyl-CoA hydrolase) (EC 3.1.2.2). [Source:UniProtKB/Swiss-Prot;Acc:Q14032] [from human gene ENSG00000136881]	IPR006862,Acyl-CoA thioester hydrolase/bile acid-CoA amino acid N-acetyltransferase	Glycine N-choloyltransferase.	NA	3707|lipid metabolism|biological_process|GO:0006629; 8080|palmitoyl-CoA hydrolase activity|molecular_function|GO:0016290;16954|glycine N-choloyltransferase activity|molecular_function|GO:0047963	-
XTROP0001S00040114	333211	NA	3	liver late down			-1.721		NA	NA	NA	NA	NA	-
XTROP0001S00020296	335265	ENSXETG00000010291	8	liver late down			-0.973		NA	IPR001148,Carbonic anhydrase, eukaryotic	NA	KOG0382|Carbonic anhydrase|General function prediction only |POORLY CHARACTERIZED	1420|carbonate dehydratase activity|molecular_function|GO:0004089; 3805|one-carbon compound metabolism|biological_process|GO:0006730; 4913|zinc ion binding|molecular_function|GO:0008270	-
XTROP0001S00031672	338863	ENSXETG00000026901	3	liver late down			-1.156		NA	IPR000719,Protein kinase;IPR002290,Serine/threonine protein kinase;IPR008266,Tyrosine protein kinase, active site	NA	KOG1164|Casein kinase (serine/threonine/tyrosine protein kinase)|Signal transduction mechanisms |CELLULAR PROCESSES AND SIGNALING	1939|protein kinase activity|molecular_function|GO:0004672; 2653|ATP binding|molecular_function|GO:0005524; 3551|protein amino acid phosphorylation|biological_process|GO:0006468; 1941|protein serine/threonine kinase activity|molecular_function|GO:0004674; 1979|protein-tyrosine kinase activity|molecular_function|GO:0004713	-
XTROP0001S00025702	340728	ENSXETG00000003194	3	liver late down			-1.631		Myosin-Id [Source:UniProtKB/Swiss-Prot;Acc:O94832]	IPR001609,Myosin head, motor region;IPR000048,IQ calmodulin-binding region;IPR010926,Myosin tail 2	Myosin ATPase.	NA	1121|motor activity|molecular_function|GO:0003774; 2653|ATP binding|molecular_function|GO:0005524; 8204|myosin|cellular_component|GO:0016459; 5196|myosin ATPase activity|molecular_function|GO:0008570	-
XTROP0001S00047741	340728	ENSXETG00000003194	8	liver late down			-2.493		Myosin-Id [Source:UniProtKB/Swiss-Prot;Acc:O94832]	IPR001609,Myosin head, motor region;IPR000048,IQ calmodulin-binding region;IPR010926,Myosin tail 2	Myosin ATPase.	NA	1121|motor activity|molecular_function|GO:0003774; 2653|ATP binding|molecular_function|GO:0005524; 8204|myosin|cellular_component|GO:0016459; 5196|myosin ATPase activity|molecular_function|GO:0008570	-
XTROP0001S00022197	341246	ENSXETG00000019615	8	liver late down			-3.071		Hypothetical protein mgc107771. [Source:UniProtKB/TrEMBL;Acc:Q4VBE1]	IPR002086,Aldehyde dehydrogenase	Aldehyde dehydrogenase (NAD+).	KOG2450|Aldehyde dehydrogenase|Energy production and conversion |METABOLISM	4804|metabolism|biological_process|GO:0008152; 8235|oxidoreductase activity|molecular_function|GO:0016491; 1361|aldehyde dehydrogenase (NAD) activity|molecular_function|GO:0004029	-
XTROP0001S00001392	342812	ENSXETG00000013342	8	liver late down			-0.933		LIM domain and actin-binding protein 1 (Epithelial protein lost in neoplasm) [Source:UniProtKB/Swiss-Prot;Acc:Q9UHB6]	IPR001781,Zn-binding protein, LIM	NA	NA	4913|zinc ion binding|molecular_function|GO:0008270	-
XTROP0001S00003149	343236	NA	3	liver late down			-3.225		NA	IPR002018,Carboxylesterase, type B;IPR000379,Esterase/lipase/thioesterase	Carboxylesterase.	KOG1516|Carboxylesterase and related proteins|General function prediction only |POORLY CHARACTERIZED	1170|catalytic activity|molecular_function|GO:0003824; 1422|carboxylesterase activity|molecular_function|GO:0004091; 2024|serine esterase activity|molecular_function|GO:0004759; 8518|carboxylic ester hydrolase activity|molecular_function|GO:0016789	-
XTROP0001S00037294	343236	NA	3	liver late down			-3.661		NA	IPR002018,Carboxylesterase, type B;IPR000379,Esterase/lipase/thioesterase	Carboxylesterase.	KOG1516|Carboxylesterase and related proteins|General function prediction only |POORLY CHARACTERIZED	1170|catalytic activity|molecular_function|GO:0003824; 1422|carboxylesterase activity|molecular_function|GO:0004091; 2024|serine esterase activity|molecular_function|GO:0004759; 8518|carboxylic ester hydrolase activity|molecular_function|GO:0016789	-
XTROP0001S00047037	343236	NA	8	liver late down			-3.001		NA	IPR002018,Carboxylesterase, type B;IPR000379,Esterase/lipase/thioesterase	Carboxylesterase.	KOG1516|Carboxylesterase and related proteins|General function prediction only |POORLY CHARACTERIZED	1170|catalytic activity|molecular_function|GO:0003824; 1422|carboxylesterase activity|molecular_function|GO:0004091; 2024|serine esterase activity|molecular_function|GO:0004759; 8518|carboxylic ester hydrolase activity|molecular_function|GO:0016789	-
XTROP0001S00012914	344561	ENSXETG00000011033	8	liver late down			-1.927		NA	IPR001128,Cytochrome P450;IPR002401,E-class P450, group I	Unspecific monooxygenase.	KOG0156|Cytochrome P450 CYP2 subfamily|Secondary metabolites biosynthesis, transport and catabolism |METABOLISM	3218|electron transport|biological_process|GO:0006118; 1783|monooxygenase activity|molecular_function|GO:0004497;17878|unspecific monooxygenase activity|molecular_function|GO:0050381	-
XTROP0001S00002119	345734	ENSXETG00000025889	8	liver late down			-2.681		Serine (Or cysteine) proteinase inhibitor, clade A, member 3M. [Source:UniProtKB/TrEMBL;Acc:Q504L9]	IPR000295,Proteinase inhibitor I4, leuserpin 2;IPR000215,Proteinase inhibitor I4, serpin	NA	KOG2392|Serpin|Defense mechanisms |CELLULAR PROCESSES AND SIGNALING	2128|serine-type endopeptidase inhibitor activity|molecular_function|GO:0004867	-
XTROP0001S00001775	345791	ENSXETG00000023339	8	liver late down			-2.802		NA	IPR000215,Proteinase inhibitor I4, serpin	NA	KOG2392|Serpin|Defense mechanisms |CELLULAR PROCESSES AND SIGNALING	2128|serine-type endopeptidase inhibitor activity|molecular_function|GO:0004867	-
XTROP0001S00026472	345793	NA	8	liver late down			-1.273		NA	IPR000295,Proteinase inhibitor I4, leuserpin 2;IPR000215,Proteinase inhibitor I4, serpin	NA	KOG2392|Serpin|Defense mechanisms |CELLULAR PROCESSES AND SIGNALING	2128|serine-type endopeptidase inhibitor activity|molecular_function|GO:0004867	-
XTROP0001S00021205	345988	ENSXETG00000002987	8	liver late down			-1.727		Choline transporter-like protein 5 (Solute carrier family 44 member 5) [Source:UniProtKB/Swiss-Prot;Acc:Q8NCS7]	IPR007603,Protein of unknown function DUF580	NA	KOG1362|Choline transporter-like protein|Lipid transport and metabolism |METABOLISM	NA	-
XTROP0001S00021030	347858	NA	8	liver late down			-2.36		NA	IPR000001,Kringle;IPR003014,N/apple PAN;IPR003609,Apple-like	NA	NA	NA	-
XTROP0001S00037748	347867	ENSXETG00000002494	3	liver late down			-1.955		Peroxisomal carnitine O-octanoyltransferase (COT)(EC 2.3.1.137) [Source:UniProtKB/Swiss-Prot;Acc:Q9UKG9]	IPR000542,Acyltransferase ChoActase/COT/CPT;IPR000585,Hemopexin	Transferring groups other than amino-acyl groups.	KOG3718|Carnitine O-acyltransferase CROT|Lipid transport and metabolism |METABOLISM	5053|acyltransferase activity|molecular_function|GO:0008415; 1475|dihydrolipoamide branched chain acyltransferase activity|molecular_function|GO:0004147; 1694|H2A/H2B histone acetyltransferase activity|molecular_function|GO:0004405; 1695|H3/H4 histone acetyltransferase activity|molecular_function|GO:0004406; 4738|N-acetyltransferase activity|molecular_function|GO:0008080; 5013|O-acyltransferase a…	-
XTROP0001S00017057	352233	ENSXETG00000021159	8	liver late down			-1.264		Protein ERGIC-53 Precursor (ER-Golgi intermediate compartment 53 kDa protein)(Lectin mannose-binding 1)(Gp58)(Intracellular mannose-specific lectin MR60) [Source:UniProtKB/Swiss-Prot;Acc:P49257]	IPR005052,Legume-like lectin	NA	KOG3838|Mannose lectin ERGIC-53, involved in glycoprotein traffic|Intracellular trafficking, secretion, and vesicular transport |CELLULAR PROCESSES AND SIGNALING	NA	-
XTROP0001S00027393	353104	ENSXETG00000016210	8	liver late down			-1.048		Bile salt export pump (ATP-binding cassette sub-family B member 11) [Source:UniProtKB/Swiss-Prot;Acc:O95342]	IPR003439,ABC transporter;IPR001140,ABC transporter, transmembrane region;IPR003593,AAA ATPase;IPR001687,ATP/GTP-binding site motif A (P-loop)	NA	KOG0055|Multidrug/pheromone exporter, ABC superfamily|Secondary metabolites biosynthesis, transport and catabolism |METABOLISM	NA	-
XTROP0001S00011059	356780	ENSXETG00000023789	8	liver late down			-1.664		Vtn-prov protein (Fragment). [Source:UniProtKB/TrEMBL;Acc:Q5HZC4]	IPR001212,Somatomedin B;IPR000585,Hemopexin	Metalloendopeptidases.	NA	NA	-
XTROP0001S00003955	359292	NA	8	liver late down			-2.026		NA	IPR010111,Kynureninase	Kynureninase.	NA	NA	-
XTROP0001S00011771	360545	ENSXETG00000021140	3	liver late down			-2.928		Cytochrome P450 1A1 (EC 1.14.14.1) (CYPIA1) (P450-P1) (P450 form 6) (P450-C). [Source:UniProtKB/Swiss-Prot;Acc:P04798] [from human gene ENSG00000140465]	IPR001128,Cytochrome P450;IPR002401,E-class P450, group I;IPR008066,E-class P450, CYP IA	Unspecific monooxygenase.	NA	NA	-
XTROP0001S00039512	360545	ENSXETG00000021140	8	liver late down			-2.518		Cytochrome P450 1A1 (EC 1.14.14.1) (CYPIA1) (P450-P1) (P450 form 6) (P450-C). [Source:UniProtKB/Swiss-Prot;Acc:P04798] [from human gene ENSG00000140465]	IPR001128,Cytochrome P450;IPR002401,E-class P450, group I;IPR008066,E-class P450, CYP IA	Unspecific monooxygenase.	NA	NA	-
XTROP0001S00032499	361535	ENSXETG00000004630	3	liver late down			-1.294		Diacetyl/L-xylulose reductase. [Source:UniProtKB/TrEMBL;Acc:Q6P630]	IPR002198,Short-chain dehydrogenase/reductase SDR;IPR002347,Glucose/ribitol dehydrogenase	NA	KOG1207|Diacetyl reductase/L-xylulose reductase|Secondary metabolites biosynthesis, transport and catabolism |METABOLISM	NA	-
XTROP0001S00012972	362678	ENSXETG00000022155	8	liver late down			-1.561		NA	IPR002888,[2Fe-2S]-binding;IPR002346,Molybdopterin dehydrogenase, FAD-binding;IPR000674,Aldehyde oxidase and xanthine dehydrogenase, a/b hammerhead;IPR008274,Aldehyde oxidase and xanthine dehydrogenase, molybdopterin binding;IPR005107,CO dehydrogenase flavoprotein, C-terminal;IPR000572,Oxidoreductase, molybdopterin binding	Aldehyde oxidase.	KOG0430|Xanthine dehydrogenase|Nucleotide transport and metabolism |METABOLISM	NA	-
XTROP0001S00023357	363450	ENSXETG00000003458	8	liver late down			-2.824		D-beta-hydroxybutyrate dehydrogenase, mitochondrial Precursor (BDH)(EC 1.1.1.30)(3-hydroxybutyrate dehydrogenase) [Source:UniProtKB/Swiss-Prot;Acc:Q02338]	IPR002198,Short-chain dehydrogenase/reductase SDR;IPR002347,Glucose/ribitol dehydrogenase	3-hydroxybutyrate dehydrogenase.	NA	NA	-
XTROP0001S00014049	363456	ENSXETG00000019402	3	liver late down			-2.374		NA	IPR001757,ATPase, E1-E2 type;IPR006069,Cation transporting ATPase;IPR008250,E1-E2 ATPase-associated region	Acting on acid anhydrides; catalyzing transmembrane movement	NA	NA	-
XTROP0001S00048623	363456	ENSXETG00000019402	8	liver late down			-2.158		NA	IPR001757,ATPase, E1-E2 type;IPR006069,Cation transporting ATPase;IPR008250,E1-E2 ATPase-associated region	Acting on acid anhydrides; catalyzing transmembrane movement	NA	NA	-
XTROP0001S00018373	365680	ENSXETG00000019626	8	liver late down			-2.135		Phenylalanine-4-hydroxylase (PAH)(EC 1.14.16.1)(Phe-4-monooxygenase) [Source:UniProtKB/Swiss-Prot;Acc:P00439]	IPR001273,Aromatic amino acid hydroxylase;IPR002912,Amino acid-binding ACT;IPR005961,Phenylalanine-4-hydroxylase, tetrameric form	Phenylalanine 4-monooxygenase.	NA	NA	-
XTROP0001S00012365	370786	ENSXETG00000009707	8	liver late down			-0.89		Spermatogenesis-associated protein 13 [Source:UniProtKB/Swiss-Prot;Acc:Q96N96]	IPR001452,SH3;IPR001849,Pleckstrin-like;IPR000219,DH;IPR011511,Variant SH3	NA	KOG3519|Invasion-inducing protein TIAM1/CDC24 and related RhoGEF GTPases|Signal transduction mechanisms |CELLULAR PROCESSES AND SIGNALING	NA	-
XTROP0001S00007100	375474	ENSXETG00000015992	8	liver late down			-2.203		NA	IPR003663,Sugar transporter;IPR005828,General substrate transporter;IPR007114,Major facilitator superfamily;IPR005829,Sugar transporter superfamily	L-arabinose isomerase.	NA	NA	-
XTROP0001S00003986	375896	ENSXETG00000019875	8	liver late down			-1.519		Insulin-like growth factor-binding protein 2 Precursor (IGF-binding protein 2)(IGFBP-2)(IBP-2) [Source:UniProtKB/Swiss-Prot;Acc:P18065]	IPR000716,Thyroglobulin type-1	NA	NA	NA	-
XTROP0001S00004635	376531	ENSXETG00000005520	3	liver late down			-1.321		Hydroxyacid oxidase 1 (HAOX1)(EC 1.1.3.15)(Glycolate oxidase)(GOX) [Source:UniProtKB/Swiss-Prot;Acc:Q9UJM8]	IPR000262,FMN-dependent alpha-hydroxy acid dehydrogenase;IPR003009,FMN/related compound-binding core;IPR008259,FMN-dependent alpha-hydroxy acid dehydrogenase, active site	(S)-2-hydroxy-acid oxidase.	KOG0538|Glycolate oxidase|Energy production and conversion |METABOLISM	NA	-
XTROP0001S00034940	376531	ENSXETG00000005520	8	liver late down			-1.269		Hydroxyacid oxidase 1 (HAOX1)(EC 1.1.3.15)(Glycolate oxidase)(GOX) [Source:UniProtKB/Swiss-Prot;Acc:Q9UJM8]	IPR000262,FMN-dependent alpha-hydroxy acid dehydrogenase;IPR003009,FMN/related compound-binding core;IPR008259,FMN-dependent alpha-hydroxy acid dehydrogenase, active site	(S)-2-hydroxy-acid oxidase.	KOG0538|Glycolate oxidase|Energy production and conversion |METABOLISM	NA	-
XTROP0001S00024910	379096	NA	3	liver late down			-1.178		NA	IPR001128,Cytochrome P450;IPR002401,E-class P450, group I	Unspecific monooxygenase.	NA	3218|electron transport|biological_process|GO:0006118; 1783|monooxygenase activity|molecular_function|GO:0004497;17878|unspecific monooxygenase activity|molecular_function|GO:0050381	-
XTROP0001S00051661	379096	NA	8	liver late down			-1.23		NA	IPR001128,Cytochrome P450;IPR002401,E-class P450, group I	Unspecific monooxygenase.	NA	3218|electron transport|biological_process|GO:0006118; 1783|monooxygenase activity|molecular_function|GO:0004497;17878|unspecific monooxygenase activity|molecular_function|GO:0050381	-
XTROP0001S00009812	385548	ENSXETG00000014638	8	liver late down			-2.29		Amyloid-like protein 2 Precursor (Amyloid protein homolog)(APPH)(CDEI box-binding protein)(CDEBP) [Source:UniProtKB/Swiss-Prot;Acc:Q06481]	IPR002223,Protease inhibitor I2, Kunitz metazoa;IPR008155,Amyloidogenic glycoprotein;IPR008154,Amyloid A4 extracellular region	NA	KOG3540|Beta amyloid precursor protein|General function prediction only |POORLY CHARACTERIZED	NA	-
XTROP0001S00006464	386661	NA	8	liver late down			-1.514		NA	IPR001862,Membrane attack complex component/perforin/complement C9;IPR002172,Low density lipoprotein-receptor, class A;IPR000436,Sushi/SCR/CCP;IPR000884,Thrombospondin, type I;IPR003884,Factor I membrane attack complex;IPR006209,EGF-like	Metalloendopeptidases.	KOG4475|FOG: Immunoglobin and related proteins|Inorganic ion transport and metabolism |METABOLISM;KOG4475|FOG: Immunoglobin and related proteins|General function prediction only |POORLY CHARACTERIZED	NA	-
XTROP0001S00022611	390586	ENSXETG00000000683	8	liver late down			-1.509		Low affinity cationic amino acid transporter 2 (CAT-2)(CAT2)(Solute carrier family 7 member 2) [Source:UniProtKB/Swiss-Prot;Acc:P52569]	IPR004841,Amino acid permease-associated region;IPR004755,Cationic amino acid transport permease;IPR002293,Amino acid/polyamine transporter I	NA	NA	NA	-
XTROP0001S00014481	393043	NA	3	liver late down			-1.732		NA	IPR002957,Keratin, type I;IPR001664,Intermediate filament protein	NA	KOG0508|Ankyrin repeat protein|General function prediction only |POORLY CHARACTERIZED	2434|structural molecule activity|molecular_function|GO:0005198	-
XTROP0001S00039610	393043	NA	8	liver late down			-1.465		NA	IPR002957,Keratin, type I;IPR001664,Intermediate filament protein	NA	KOG0508|Ankyrin repeat protein|General function prediction only |POORLY CHARACTERIZED	2434|structural molecule activity|molecular_function|GO:0005198	-
XTROP0001S00027567	393496	ENSXETG00000019999	8	liver late down			-0.89		Fc receptor-like 3 precursor [Source:RefSeq_peptide;Acc:NP_443171] [from human gene ENSG00000160856]	IPR007110,Immunoglobulin-like;IPR003599,Immunoglobulin subtype	NA	NA	NA	-
XTROP0001S00008356	397135	ENSXETG00000005780	8	liver late down			-1.34		Hypothetical LOC496497. [Source:UniProtKB/TrEMBL;Acc:Q5XGG4]	IPR007110,Immunoglobulin-like;IPR003596,Immunoglobulin V-type;IPR003598,Immunoglobulin C2 type;IPR003599,Immunoglobulin subtype	NA	KOG4194|Membrane glycoprotein LIG-1|Signal transduction mechanisms |CELLULAR PROCESSES AND SIGNALING	NA	-
XTROP0001S00014914	398735	NA	8	liver late down			-1.313		NA	NA	NA	KOG3544|Collagens (type IV and type XIII), and related proteins|Extracellular structures |CELLULAR PROCESSES AND SIGNALING	NA	-
XTROP0001S00064513	398826	ENSXETG00000022654	8	liver late down			-1.883		Epoxide hydrolase 1 (EC 3.3.2.9)(Microsomal epoxide hydrolase)(Epoxide hydratase) [Source:UniProtKB/Swiss-Prot;Acc:P07099]	IPR000639,Epoxide hydrolase;IPR000073,Alpha/beta hydrolase fold;IPR010497,Epoxide hydrolase, N-terminal;IPR000379,Esterase/lipase/thioesterase	Epoxide hydrolase.	KOG2565|Predicted hydrolases or acyltransferases (alpha/beta hydrolase superfamily)|General function prediction only |POORLY CHARACTERIZED	1170|catalytic activity|molecular_function|GO:0003824; 1600|epoxide hydrolase activity|molecular_function|GO:0004301; 2907|microsome|cellular_component|GO:0005792; 6221|response to toxin|biological_process|GO:0009636; 7826|membrane|cellular_component|GO:0016020	-
XTROP0001S00020528	399976	NA	8	liver late down			-0.915		NA	IPR001314,Peptidase S1A, chymotrypsin;IPR000436,Sushi/SCR/CCP;IPR001254,Peptidase S1, chymotrypsin;IPR000859,CUB	Complement component C1r.	KOG3627|Trypsin|Amino acid transport and metabolism |METABOLISM	1596|trypsin activity|molecular_function|GO:0004295; 3588|proteolysis and peptidolysis|biological_process|GO:0006508; 1579|chymotrypsin activity|molecular_function|GO:0004263; 1161|complement component C1r activity|molecular_function|GO:0003815	-
XTROP0001S00004347	400010	ENSXETG00000023914	3	liver late down			-1.322		NA	IPR001314,Peptidase S1A, chymotrypsin;IPR000436,Sushi/SCR/CCP;IPR001254,Peptidase S1, chymotrypsin;IPR000859,CUB;IPR001881,EGF-like calcium-binding;IPR006210,Type I EGF;NULL,NULL;IPR000152,Aspartic acid and asparagine hydroxylation site;IPR006209,EGF-like	Complement component C1r.	NA	1596|trypsin activity|molecular_function|GO:0004295; 3588|proteolysis and peptidolysis|biological_process|GO:0006508; 1579|chymotrypsin activity|molecular_function|GO:0004263; 2641|calcium ion binding|molecular_function|GO:0005509; 1161|complement component C1r activity|molecular_function|GO:0003815	-
XTROP0001S00058045	400010	ENSXETG00000023914	8	liver late down			-1.459		NA	IPR001314,Peptidase S1A, chymotrypsin;IPR000436,Sushi/SCR/CCP;IPR001254,Peptidase S1, chymotrypsin;IPR000859,CUB;IPR001881,EGF-like calcium-binding;IPR006210,Type I EGF;NULL,NULL;IPR000152,Aspartic acid and asparagine hydroxylation site;IPR006209,EGF-like	Complement component C1r.	NA	1596|trypsin activity|molecular_function|GO:0004295; 3588|proteolysis and peptidolysis|biological_process|GO:0006508; 1579|chymotrypsin activity|molecular_function|GO:0004263; 2641|calcium ion binding|molecular_function|GO:0005509; 1161|complement component C1r activity|molecular_function|GO:0003815	-
XTROP0001S00018188	403829	ENSXETG00000006425	8	liver late down			-3.44		Hydroxysteroid (17-beta) dehydrogenase 13. [Source:UniProtKB/TrEMBL;Acc:Q5M8V5]	IPR002198,Short-chain dehydrogenase/reductase SDR;IPR002347,Glucose/ribitol dehydrogenase;IPR001604,DNA/RNA non-specific endonuclease	Gluconate 5-dehydrogenase.	KOG1201|Hydroxysteroid 17-beta dehydrogenase 11|Secondary metabolites biosynthesis, transport and catabolism |METABOLISM	1055|nucleic acid binding|molecular_function|GO:0003676; 1805|endonuclease activity|molecular_function|GO:0004519; 4804|metabolism|biological_process|GO:0008152; 8235|oxidoreductase activity|molecular_function|GO:0016491; 5481|gluconate 5-dehydrogenase activity|molecular_function|GO:0008874; 5482|gluconate dehydrogenase activity|molecular_function|GO:0008875	-
XTROP0001S00002105	404162	ENSXETG00000022562	8	liver late down			-1.319		NA	IPR001356,Homeobox	NA	NA	1056|DNA binding|molecular_function|GO:0003677; 1076|transcription factor activity|molecular_function|GO:0003700; 2757|nucleus|cellular_component|GO:0005634; 3449|regulation of transcription, DNA-dependent|biological_process|GO:0006355	-
XTROP0001S00017359	408153	NA	8	liver late down			-1.184		NA	IPR000276,Rhodopsin-like GPCR superfamily;IPR000725,Olfactory receptor	NA	KOG3656|FOG: 7 transmembrane receptor|General function prediction only |POORLY CHARACTERIZED	680|rhodopsin-like receptor activity|molecular_function|GO:0001584; 4231|G-protein coupled receptor protein signaling pathway|biological_process|GO:0007186; 7827|integral to membrane|cellular_component|GO:0016021; 2236|olfactory receptor activity|molecular_function|GO:0004984	-
XTROP0001S00019214	417313	NA	8	liver late down			-0.837		NA	IPR002213,UDP-glucuronosyl/UDP-glucosyltransferase	2-hydroxyacylsphingosine 1-beta-galactosyltransferase.	NA	NA	-
XTROP0001S00009789	419600	ENSXETG00000017377	3	liver late down			-2.849		MGC89941 protein. [Source:UniProtKB/TrEMBL;Acc:Q66IF4]	IPR000859,CUB;IPR000504,RNA-binding region RNP-1 (RNA recognition motif)	NA	NA	NA	-
XTROP0001S00036394	419600	ENSXETG00000017377	8	liver late down			-2.217		MGC89941 protein. [Source:UniProtKB/TrEMBL;Acc:Q66IF4]	IPR000859,CUB;IPR000504,RNA-binding region RNP-1 (RNA recognition motif)	NA	NA	NA	-
XTROP0001S00011677	419965	ENSXETG00000020595	8	liver late down			-1.542		NA	IPR001805,Adenosine kinase;IPR002173,Carbohydrate kinase, PfkB	Adenosine kinase.	NA	NA	-
XTROP0001S00003940	420297	ENSXETG00000009060	8	liver late down			-1.285		NA	IPR002213,UDP-glucuronosyl/UDP-glucosyltransferase	UDP-glucuronosyltransferase.	NA	NA	-
XTROP0001S00022656	420551	ENSXETG00000010930	3	liver late down			-1.337		Complement C2 Precursor (EC 3.4.21.43)(C3/C5 convertase) [Contains Complement C2b fragment;Complement C2a fragment] [Source:UniProtKB/Swiss-Prot;Acc:P06681]	IPR002035,von Willebrand factor, type A;IPR001314,Peptidase S1A, chymotrypsin;IPR000436,Sushi/SCR/CCP;IPR001254,Peptidase S1, chymotrypsin	Classical-complement pathway C3/C5 convertase.	NA	NA	-
XTROP0001S00063536	420551	NA	3	liver late down			-1.256		NA	IPR002035,von Willebrand factor, type A;IPR001314,Peptidase S1A, chymotrypsin;IPR000436,Sushi/SCR/CCP;IPR001254,Peptidase S1, chymotrypsin	Classical-complement pathway C3/C5 convertase.	NA	NA	-
XTROP0001S00063537	420551	NA	8	liver late down			-1.244		NA	IPR002035,von Willebrand factor, type A;IPR001314,Peptidase S1A, chymotrypsin;IPR000436,Sushi/SCR/CCP;IPR001254,Peptidase S1, chymotrypsin	Classical-complement pathway C3/C5 convertase.	NA	NA	-
XTROP0001S00000615	421843	ENSXETG00000025262	8	liver late down			-1.264		Apoh-prov protein (Fragment). [Source:UniProtKB/TrEMBL;Acc:Q5M913]	IPR000436,Sushi/SCR/CCP	NA	KOG4297|C-type lectin|Defense mechanisms |CELLULAR PROCESSES AND SIGNALING;KOG4297|C-type lectin|Signal transduction mechanisms |CELLULAR PROCESSES AND SIGNALING	NA	-
XTROP0001S00023052	429026	ENSXETG00000012089	3	liver late down			-2.069		Hypothetical protein mgc108027. [Source:UniProtKB/TrEMBL;Acc:Q4VA80]	IPR004157,Organic anion transporter polypeptide (OATP), C-terminal;IPR011497,Protease inhibitor, Kazal-type;IPR004156,Organic anion transporter polypeptide (OATP), N-terminal;IPR007114,Major facilitator superfamily	NA	NA	NA	-
XTROP0001S00044244	429026	ENSXETG00000012089	8	liver late down			-2.329		Hypothetical protein mgc108027. [Source:UniProtKB/TrEMBL;Acc:Q4VA80]	IPR004157,Organic anion transporter polypeptide (OATP), C-terminal;IPR011497,Protease inhibitor, Kazal-type;IPR004156,Organic anion transporter polypeptide (OATP), N-terminal;IPR007114,Major facilitator superfamily	NA	NA	NA	-
XTROP0001S00024436	429151	ENSXETG00000005288	8	liver late down			-2.39		NA	IPR001128,Cytochrome P450;IPR002401,E-class P450, group I;IPR008069,E-class P450, CYP2D	Unspecific monooxygenase.	KOG0156|Cytochrome P450 CYP2 subfamily|Secondary metabolites biosynthesis, transport and catabolism |METABOLISM	NA	-
XTROP0001S00047747	431298	NA	3	liver late down			-1.415		NA	IPR003689,Zinc transporter ZIP	NA	NA	NA	-
XTROP0001S00019145	431298	ENSXETG00000016876	8	liver late down			-1.677		Zinc transporter ZIP4 Precursor (Zrt- and Irt-like protein 4)(ZIP-4)(Solute carrier family 39 member 4) [Source:UniProtKB/Swiss-Prot;Acc:Q6P5W5]	IPR003689,Zinc transporter ZIP	NA	NA	NA	-
XTROP0001S00015884	434910	ENSXETG00000024432	8	liver late down			-1.434		Zinc finger protein GLIS2 (GLI-similar 2)(Neuronal Krueppel-like protein) [Source:UniProtKB/Swiss-Prot;Acc:Q9BZE0]	IPR007087,Zn-finger, C2H2 type	NA	NA	1055|nucleic acid binding|molecular_function|GO:0003676; 2757|nucleus|cellular_component|GO:0005634; 4913|zinc ion binding|molecular_function|GO:0008270	-
XTROP0001S00010918	435656	NA	8	liver late down			-2.464		NA	NA	NA	NA	NA	-
XTROP0001S00009541	436064	ENSXETG00000011920	8	liver late down			-1.55		ATP-sensitive inward rectifier potassium channel 8 (Potassium channel, inwardly rectifying subfamily J member 8)(Inwardly rectifier K(+) channel Kir6.1)(uKATP-1) [Source:UniProtKB/Swiss-Prot;Acc:Q15842]	IPR001838,K+ channel, inward rectifier;IPR003278,Kir6.1 inward rectifier K+ channel;IPR001622,K+ channel, pore region	NA	KOG3827|Inward rectifier K+ channel|Inorganic ion transport and metabolism |METABOLISM	2487|potassium channel activity|molecular_function|GO:0005267; 3882|potassium ion transport|biological_process|GO:0006813; 7826|membrane|cellular_component|GO:0016020; 2471|inward rectifier potassium channel activity|molecular_function|GO:0005242; 7101|ATP-activated inward rectifier potassium channel activity|molecular_function|GO:0015272	-
XTROP0001S00013086	439257	NA	8	liver late down			-1.325		NA	IPR001128,Cytochrome P450;IPR002401,E-class P450, group I	NA	KOG0156|Cytochrome P450 CYP2 subfamily|Secondary metabolites biosynthesis, transport and catabolism |METABOLISM	3218|electron transport|biological_process|GO:0006118; 1783|monooxygenase activity|molecular_function|GO:0004497	-
XTROP0001S00000670	443405	NA	8	liver late down			-1.188		NA	IPR007110,Immunoglobulin-like;IPR003597,Immunoglobulin C1 type	NA	NA	NA	-
XTROP0001S00015408	443501	ENSXETG00000027558	8	liver late down			-1.987		Cytochrome P450 2A13 (EC 1.14.14.1) (CYPIIA13). [Source:UniProtKB/Swiss-Prot;Acc:Q16696] [from human gene ENSG00000197838]	IPR002401,E-class P450, group I	NA	KOG0156|Cytochrome P450 CYP2 subfamily|Secondary metabolites biosynthesis, transport and catabolism |METABOLISM	NA	-
XTROP0001S00007759	445558	ENSXETG00000027558	8	liver late down			-2.221		Cytochrome P450 2A13 (EC 1.14.14.1) (CYPIIA13). [Source:UniProtKB/Swiss-Prot;Acc:Q16696] [from human gene ENSG00000197838]	IPR001128,Cytochrome P450;IPR002401,E-class P450, group I;IPR008067,E-class P450, CYP2A	NA	KOG0156|Cytochrome P450 CYP2 subfamily|Secondary metabolites biosynthesis, transport and catabolism |METABOLISM	NA	-
XTROP0001S00025284	446053	ENSXETG00000009423	8	liver late down			-4.778		NA	IPR000295,Proteinase inhibitor I4, leuserpin 2;IPR000215,Proteinase inhibitor I4, serpin	NA	KOG2392|Serpin|Defense mechanisms |CELLULAR PROCESSES AND SIGNALING	NA	-
XTROP0001S00026452	446178	NA	8	liver late down			-1.436		NA	IPR001003,MHC Class II alpha chain, alpha-1	NA	NA	NA	-
XTROP0001S00026412	446452	ENSXETG00000010785	8	liver late down			-1.291		NA	IPR000863,Sulfotransferase	Sulfotransferases.	KOG1584|Sulfotransferase|General function prediction only |POORLY CHARACTERIZED	NA	-
XTROP0001S00040121	448237	ENSXETG00000020012	3	liver late down			-1.564		Proprotein convertase subtilisin/kexin type 9 Precursor (EC 3.4.21.-)(Proprotein convertase PC9)(Subtilisin/kexin-like protease PC9)(Neural apoptosis-regulated convertase 1)(NARC-1) [Source:UniProtKB/Swiss-Prot;Acc:Q8NBP7]	IPR000209,Peptidase S8 and S53, subtilisin, kexin, sedolisin;IPR010259,Proteinase inhibitor I9, subtilisin propeptide	NA	KOG1153|Subtilisin-related protease/Vacuolar protease B|Posttranslational modification, protein turnover, chaperones |CELLULAR PROCESSES AND SIGNALING	NA	-
XTROP0001S00022495	448237	ENSXETG00000020012	8	liver late down			-1.35		Proprotein convertase subtilisin/kexin type 9 Precursor (EC 3.4.21.-)(Proprotein convertase PC9)(Subtilisin/kexin-like protease PC9)(Neural apoptosis-regulated convertase 1)(NARC-1) [Source:UniProtKB/Swiss-Prot;Acc:Q8NBP7]	IPR000209,Peptidase S8 and S53, subtilisin, kexin, sedolisin;IPR010259,Proteinase inhibitor I9, subtilisin propeptide	NA	KOG1153|Subtilisin-related protease/Vacuolar protease B|Posttranslational modification, protein turnover, chaperones |CELLULAR PROCESSES AND SIGNALING	NA	-
XTROP0001S00015586	448321	NA	8	liver late down			-1.158		NA	IPR000863,Sulfotransferase	Aryl sulfotransferase.	NA	NA	-
XTROP0001S00021000	448548	ENSXETG00000015896	3	liver late down			-2.168		NA	IPR000796,Aspartate/other aminotransferase;IPR004839,Aminotransferase, class I and II;IPR004838,Aminotransferases class-I pyridoxal-phosphate-binding site	Aspartate aminotransferase.	NA	NA	-
XTROP0001S00061950	448548	ENSXETG00000015896	3	liver late down			-2.098		NA	IPR000796,Aspartate/other aminotransferase;IPR004839,Aminotransferase, class I and II;IPR004838,Aminotransferases class-I pyridoxal-phosphate-binding site	Aspartate aminotransferase.	NA	NA	-
XTROP0001S00061952	448548	ENSXETG00000015896	8	liver late down			-2.16		NA	IPR000796,Aspartate/other aminotransferase;IPR004839,Aminotransferase, class I and II;IPR004838,Aminotransferases class-I pyridoxal-phosphate-binding site	Aspartate aminotransferase.	NA	NA	-
XTROP0001S00061210	448775	NA	8	liver late down			-1.579		NA	IPR002035,von Willebrand factor, type A;IPR010600,Inter-alpha-trypsin inhibitor heavy chain, C-terminal;IPR006587,Vault protein inter-alpha-trypsin	NA	KOG2353|L-type voltage-dependent Ca2+ channel, alpha2/delta subunit|Signal transduction mechanisms |CELLULAR PROCESSES AND SIGNALING;KOG2353|L-type voltage-dependent Ca2+ channel, alpha2/delta subunit|Inorganic ion transport and metabolism |METABOLISM	NA	-
XTROP0001S00018050	448993	NA	8	liver late down			-1.329		NA	IPR002213,UDP-glucuronosyl/UDP-glucosyltransferase	UDP-glucuronosyltransferase.	KOG1192|UDP-glucuronosyl and UDP-glucosyl transferase|Energy production and conversion |METABOLISM;KOG1192|UDP-glucuronosyl and UDP-glucosyl transferase|Carbohydrate transport and metabolism |METABOLISM	4804|metabolism|biological_process|GO:0008152; 8488|transferase activity, transferring hexosyl groups|molecular_function|GO:0016758; 6857|glucuronosyltransferase activity|molecular_function|GO:0015020	-
XTROP0001S00060560	449128	NA	3	liver late down			-1.503		NA	IPR001382,Glycoside hydrolase, family 47	Mannosyl-oligosaccharide 1,2-alpha-mannosidase.	NA	1844|mannosyl-oligosaccharide 1,2-alpha-mannosidase activity|molecular_function|GO:0004571; 2641|calcium ion binding|molecular_function|GO:0005509; 3568|N-linked glycosylation|biological_process|GO:0006487; 7826|membrane|cellular_component|GO:0016020	-
XTROP0001S00066202	450940	NA	3	liver late down			-1.357		NA	IPR001128,Cytochrome P450;IPR002401,E-class P450, group I	NA	NA	3218|electron transport|biological_process|GO:0006118; 1783|monooxygenase activity|molecular_function|GO:0004497	-
XTROP0001S00021343	451044	ENSXETG00000011276	8	liver late down			-1.788		NA	NA	NA	NA	NA	-
XTROP0001S00004443	451340	ENSXETG00000021180	8	liver late down			-1.786		Superoxide dismutase 2, mitochondrial. [Source:UniProtKB/TrEMBL;Acc:Q6DJC5]	IPR001189,Manganese and iron superoxide dismutase	Superoxide dismutase.	KOG0876|Manganese superoxide dismutase|Inorganic ion transport and metabolism |METABOLISM	2046|superoxide dismutase activity|molecular_function|GO:0004784; 3870|superoxide metabolism|biological_process|GO:0006801;15867|metal ion binding|molecular_function|GO:0046872; 2047|copper, zinc superoxide dismutase activity|molecular_function|GO:0004785; 5021|iron superoxide dismutase activity|molecular_function|GO:0008382; 5022|manganese superoxide dismutase activity|molecular_function|GO:0008…	-
XTROP0001S00009584	451342	ENSXETG00000021174	8	liver late down			-1.01		Acetyl-Coenzyme A acetyltransferase 2. [Source:UniProtKB/TrEMBL;Acc:Q6P802]	IPR002155,Thiolase	Acetyl-CoA C-acetyltransferase.	KOG1390|Acetyl-CoA acetyltransferase|Lipid transport and metabolism |METABOLISM	1321|acetyl-CoA C-acetyltransferase activity|molecular_function|GO:0003985	-
XTROP0001S00008630	451699	ENSXETG00000013185	8	liver late down			-1.237		NA	IPR010401,Amylo-alpha-1,6-glucosidase;IPR006421,Glycogen debranching enzyme	NA	NA	1462|4-alpha-glucanotransferase activity|molecular_function|GO:0004134; 1463|amylo-alpha-1,6-glucosidase activity|molecular_function|GO:0004135; 3080|glycogen biosynthesis|biological_process|GO:0005978	-
XTROP0001S00020877	452843	ENSXETG00000001201	8	liver late down			-1.922		Allantoicase (EC 3.5.3.4) (Allantoate amidinohydrolase). [Source:UniProtKB/Swiss-Prot;Acc:Q640T1]	IPR005164,Allantoicase repeat	Allantoicase.	NA	NA	-
XTROP0001S00001479	453772	ENSXETG00000013352	8	liver late down			-1.535		Glycerol-3-phosphate dehydrogenase 1-like. [Source:UniProtKB/TrEMBL;Acc:Q6DFQ1]	IPR006109,NAD-dependent glycerol-3-phosphate dehydrogenase, C-terminal;IPR006168,NAD-dependent glycerol-3-phosphate dehydrogenase;IPR011128,NAD-dependent glycerol-3-phosphate dehydrogenase, N-terminal	Glycerol-3-phosphate dehydrogenase (NAD+).	NA	3077|carbohydrate metabolism|biological_process|GO:0005975; 8352|oxidoreductase activity, acting on CH-OH group of donors|molecular_function|GO:0016614; 1664|glycerol-3-phosphate dehydrogenase (NAD+) activity|molecular_function|GO:0004367; 3174|glycerol-3-phosphate metabolism|biological_process|GO:0006072; 5926|glycerol-3-phosphate dehydrogenase complex|cellular_component|GO:0009331; 2855|cytopla…	-
XTROP0001S00000154	454193	ENSXETG00000025892	8	liver late down			-4.643		Serpina3k-prov protein (Fragment). [Source:UniProtKB/TrEMBL;Acc:Q5M911]	IPR000295,Proteinase inhibitor I4, leuserpin 2;IPR000215,Proteinase inhibitor I4, serpin	NA	NA	2128|serine-type endopeptidase inhibitor activity|molecular_function|GO:0004867	-
XTROP0001S00007914	454194	ENSXETG00000025891	8	liver late down			-2.92		Hypothetical protein LOC496728. [Source:UniProtKB/TrEMBL;Acc:Q5M8K2]	IPR000295,Proteinase inhibitor I4, leuserpin 2;IPR000215,Proteinase inhibitor I4, serpin	NA	NA	2128|serine-type endopeptidase inhibitor activity|molecular_function|GO:0004867	-
XTROP0001S00061318	454217	NA	3	liver late down			-1.641		NA	IPR001148,Carbonic anhydrase, eukaryotic	Carbonate dehydratase.	KOG0382|Carbonic anhydrase|General function prediction only |POORLY CHARACTERIZED	1420|carbonate dehydratase activity|molecular_function|GO:0004089; 3805|one-carbon compound metabolism|biological_process|GO:0006730; 4913|zinc ion binding|molecular_function|GO:0008270	-
XTROP0001S00010309	454476	ENSXETG00000011901	8	liver late down			-2.402		Slc2a5-prov protein. [Source:UniProtKB/TrEMBL;Acc:Q640S8]	IPR003663,Sugar transporter;IPR000803,Facilitated glucose transporter;IPR005828,General substrate transporter;IPR007114,Major facilitator superfamily;IPR000005,Helix-turn-helix, AraC type;IPR005829,Sugar transporter superfamily	L-arabinose isomerase.	KOG0569|Permease of the major facilitator superfamily|Carbohydrate transport and metabolism |METABOLISM	NA	-
XTROP0001S00015632	454870	ENSXETG00000010166	3	liver late down			-2.123		Alcohol dehydrogenase 6 (Class V). [Source:UniProtKB/TrEMBL;Acc:Q5I0S0]	IPR002085,Zinc-containing alcohol dehydrogenase superfamily;IPR002328,Zinc-containing alcohol dehydrogenase	Alcohol dehydrogenase.	NA	NA	-
XTROP0001S00061509	454870	ENSXETG00000010166	8	liver late down			-1.804		Alcohol dehydrogenase 6 (Class V). [Source:UniProtKB/TrEMBL;Acc:Q5I0S0]	IPR002085,Zinc-containing alcohol dehydrogenase superfamily;IPR002328,Zinc-containing alcohol dehydrogenase	Alcohol dehydrogenase.	NA	NA	-
XTROP0001S00039838	454909	ENSXETG00000000237	3	liver late down			-0.929		Zinc finger E-box-binding homeobox 2 (Zinc finger homeobox protein 1b)(Smad-interacting protein 1)(SMADIP1) [Source:UniProtKB/Swiss-Prot;Acc:O60315]	IPR007087,Zn-finger, C2H2 type;IPR001356,Homeobox	NA	NA	NA	-
XTROP0001S00057882	455262	ENSXETG00000007245	3	liver late down			-1.897		Coagulation factor XII Precursor (EC 3.4.21.38)(Hageman factor)(HAF) [Contains Coagulation factor XIIa heavy chain;Beta-factor XIIa part 1;Beta-factor XIIa part 2;Coagulation factor XIIa light chain] [Source:UniProtKB/Swiss-Prot;Acc:P00748]	IPR000001,Kringle;IPR000562,Type II fibronectin, collagen-binding;IPR001314,Peptidase S1A, chymotrypsin;IPR006209,EGF-like;IPR001254,Peptidase S1, chymotrypsin;IPR001881,EGF-like calcium-binding;IPR006210,Type I EGF;IPR000083,Fibronectin, type I	Coagulation factor XIIa.	NA	NA	-
XTROP0001S00014369	455262	NA	8	liver late down			-1.501		NA	IPR000001,Kringle;IPR000562,Type II fibronectin, collagen-binding;IPR001314,Peptidase S1A, chymotrypsin;IPR006209,EGF-like;IPR001254,Peptidase S1, chymotrypsin;IPR001881,EGF-like calcium-binding;IPR006210,Type I EGF;IPR000083,Fibronectin, type I	Coagulation factor XIIa.	NA	NA	-
XTROP0001S00001302	455723	ENSXETG00000007561	8	liver late down			-2.654		NA	IPR002226,Catalase	Catalase.	NA	NA	-
XTROP0001S00035543	456369	NA	3	liver late down			-2.141		NA	IPR002085,Zinc-containing alcohol dehydrogenase superfamily;IPR002328,Zinc-containing alcohol dehydrogenase	L-iditol 2-dehydrogenase.	NA	NA	-
XTROP0001S00021363	456369	ENSXETG00000023897	3	liver late down			-2.415		Sorbitol dehydrogenase. [Source:UniProtKB/TrEMBL;Acc:Q5M8L5]	IPR002085,Zinc-containing alcohol dehydrogenase superfamily;IPR002328,Zinc-containing alcohol dehydrogenase	L-iditol 2-dehydrogenase.	NA	NA	-
XTROP0001S00035544	456369	ENSXETG00000023897	8	liver late down			-1.942		Sorbitol dehydrogenase. [Source:UniProtKB/TrEMBL;Acc:Q5M8L5]	IPR002085,Zinc-containing alcohol dehydrogenase superfamily;IPR002328,Zinc-containing alcohol dehydrogenase	L-iditol 2-dehydrogenase.	NA	NA	-
XTROP0001S00000041	456512	ENSXETG00000009054	8	liver late down			-1.678		MGC97647 protein. [Source:UniProtKB/TrEMBL;Acc:Q5BJ68]	IPR001709,Flavoprotein pyridine nucleotide cytochrome reductase;IPR001834,NADH:cytochrome b5 reductase (CBR);IPR001433,Oxidoreductase FAD/NAD(P)-binding;IPR008333,Oxidoreductase FAD-binding region	Cytochrome-b5 reductase.	NA	NA	-
XTROP0001S00005755	457303	ENSXETG00000005274	8	liver late down			-1.087		NA	IPR000463,Cytosolic fatty-acid binding protein;IPR000566,Lipocalin-related protein and Bos/Can/Equ allergen	NA	KOG4015|Fatty acid-binding protein FABP|Lipid transport and metabolism |METABOLISM	NA	-
XTROP0001S00003656	457553	ENSXETG00000020404	8	liver late down			-1.735		Rab25-prov protein. [Source:UniProtKB/TrEMBL;Acc:Q66KL6]	IPR001806,Ras GTPase;IPR003577,Ras small GTPase, Ras type;IPR003578,Ras small GTPase, Rho type;IPR003579,Ras small GTPase, Rab type;IPR002041,GTP-binding nuclear protein Ran;IPR005225,Small GTP-binding protein domain;IPR002078,Sigma-54 factor, interaction region	NA	NA	NA	-
XTROP0001S00013831	457574	ENSXETG00000012378	8	liver late down			-0.913		NA	IPR000022,Carboxyl transferase	Propionyl-CoA carboxylase.	NA	NA	-
XTROP0001S00019506	457620	ENSXETG00000007448	8	liver late down			-1.126		Phosphotriesterase-related protein (Parathion hydrolase-related protein)(HPHRP) [Source:UniProtKB/Swiss-Prot;Acc:Q96BW5]	IPR001559,Aryldialkylphosphatase	NA	NA	NA	-
XTROP0001S00022321	457962	ENSXETG00000021105	8	liver late down			-1.351		L-3-hydroxyacyl-Coenzyme A dehydrogenase, short chain. [Source:UniProtKB/TrEMBL;Acc:Q5XGI2]	IPR001327,FAD-dependent pyridine nucleotide-disulphide oxidoreductase;IPR006108,3-hydroxyacyl-CoA dehydrogenase, C-terminal;IPR006176,3-hydroxyacyl-CoA dehydrogenase, NAD-binding;IPR000205,NAD-binding site;IPR006180,3-hydroxyacyl-CoA dehydrogenase	3-hydroxyacyl-CoA dehydrogenase.	KOG2304|3-hydroxyacyl-CoA dehydrogenase|Lipid transport and metabolism |METABOLISM	NA	-
XTROP0001S00025864	458002	ENSXETG00000006173	8	liver late down			-3.016		Cytochrome P450 8B1 (EC 1.14.13.95)(CYPVIIIB1)(7-alpha-hydroxycholest-4-en-3-one 12-alpha-hydroxylase)(7-alpha-hydroxy-4-cholesten-3-one 12-alpha-hydroxylase)(Sterol 12-alpha-hydroxylase) [Source:UniProtKB/Swiss-Prot;Acc:Q9UNU6]	IPR002403,E-class P450, group IV;IPR001128,Cytochrome P450	Acting on paired donors, with incorporation or reduction of	KOG0684|Cytochrome P450|Secondary metabolites biosynthesis, transport and catabolism |METABOLISM	NA	-
XTROP0001S00009929	458025	ENSXETG00000026169	8	liver late down			-2.122		NA	IPR001601,Generic methyltransferase;IPR000051,SAM (and some other nucleotide) binding motif	Phosphoethanolamine N-methyltransferase.	KOG1269|SAM-dependent methyltransferases|Lipid transport and metabolism |METABOLISM;KOG1269|SAM-dependent methyltransferases|General function prediction only |POORLY CHARACTERIZED	NA	-
XTROP0001S00014217	458104	NA	8	liver late down			-1.722		NA	IPR001128,Cytochrome P450;IPR002401,E-class P450, group I	With reduced flavin or flavoprotein as one donor, and	NA	NA	-
XTROP0001S00025107	458107	ENSXETG00000027566	3	liver late down			-2.666		CYP2A13 protein. [Source:UniProtKB/TrEMBL;Acc:Q6DIW7]	IPR001128,Cytochrome P450;IPR002401,E-class P450, group I	Unspecific monooxygenase.	NA	NA	-
XTROP0001S00066104	458107	ENSXETG00000027566	3	liver late down			-2.624		CYP2A13 protein. [Source:UniProtKB/TrEMBL;Acc:Q6DIW7]	IPR001128,Cytochrome P450;IPR002401,E-class P450, group I	Unspecific monooxygenase.	NA	NA	-
XTROP0001S00066105	458107	ENSXETG00000027566	8	liver late down			-2.103		CYP2A13 protein. [Source:UniProtKB/TrEMBL;Acc:Q6DIW7]	IPR001128,Cytochrome P450;IPR002401,E-class P450, group I	Unspecific monooxygenase.	NA	NA	-
XTROP0001S00007622	458110	ENSXETG00000027563	8	liver late down			-2.552		Cytochrome P450 2A13 (EC 1.14.14.1) (CYPIIA13). [Source:UniProtKB/Swiss-Prot;Acc:Q16696] [from human gene ENSG00000197838]	IPR001128,Cytochrome P450;IPR002401,E-class P450, group I;IPR008067,E-class P450, CYP2A	Unspecific monooxygenase.	NA	NA	-
XTROP0001S00009964	458114	ENSXETG00000027558	8	liver late down			-2.074		Cytochrome P450 2A13 (EC 1.14.14.1) (CYPIIA13). [Source:UniProtKB/Swiss-Prot;Acc:Q16696] [from human gene ENSG00000197838]	IPR001128,Cytochrome P450;IPR002401,E-class P450, group I	Unspecific monooxygenase.	NA	NA	-
XTROP0001S00025102	458115	ENSXETG00000018658	8	liver late down			-1.669		Cytochrome P450 2A13 (EC 1.14.14.1) (CYPIIA13). [Source:UniProtKB/Swiss-Prot;Acc:Q16696] [from human gene ENSG00000197838]	IPR001128,Cytochrome P450;IPR002401,E-class P450, group I	Unspecific monooxygenase.	NA	NA	-
XTROP0001S00061651	458213	NA	3	liver late down			-1.067		NA	IPR003962,Fibronectin, type III subdomain;IPR000998,MAM;IPR000242,Tyrosine specific protein phosphatase;IPR003961,Fibronectin, type III;IPR007110,Immunoglobulin-like;IPR003595,Protein tyrosine phosphatase, catalytic region;IPR003599,Immunoglobulin subtype;IPR000387,Tyrosine specific protein phosphatase and dual specificity protein phosphatase	Protein-tyrosine-phosphatase.	NA	NA	-
XTROP0001S00019822	458261	ENSXETG00000016238	8	liver late down			-1.084		Glutathione S-transferase kappa 1. [Source:UniProtKB/TrEMBL;Acc:Q5M8U8]	IPR001853,DSBA oxidoreductase	NA	NA	NA	-
XTROP0001S00009337	458414	ENSXETG00000008000	8	liver late down			-0.994		NA	IPR001356,Homeobox;IPR006897,Hepatocyte nuclear factor 1, beta isoform, C-terminal;IPR006899,Hepatocyte nuclear factor 1, N-terminal	NA	NA	NA	-
XTROP0001S00003698	458504	ENSXETG00000004408	3	liver late down			-1.495		MGC89248 protein. [Source:UniProtKB/TrEMBL;Acc:Q6DIT0]	IPR002198,Short-chain dehydrogenase/reductase SDR;IPR002347,Glucose/ribitol dehydrogenase	Retinol dehydrogenase.	NA	4804|metabolism|biological_process|GO:0008152; 8235|oxidoreductase activity|molecular_function|GO:0016491; 2011|retinol dehydrogenase activity|molecular_function|GO:0004745	-
XTROP0001S00058619	458504	ENSXETG00000004408	8	liver late down			-2.043		MGC89248 protein. [Source:UniProtKB/TrEMBL;Acc:Q6DIT0]	IPR002198,Short-chain dehydrogenase/reductase SDR;IPR002347,Glucose/ribitol dehydrogenase	Retinol dehydrogenase.	NA	4804|metabolism|biological_process|GO:0008152; 8235|oxidoreductase activity|molecular_function|GO:0016491; 2011|retinol dehydrogenase activity|molecular_function|GO:0004745	-
XTROP0001S00005857	458737	ENSXETG00000012601	8	liver late down			-1.462		MGC108278 protein. [Source:UniProtKB/TrEMBL;Acc:Q5EBF7]	IPR006090,Acyl-CoA dehydrogenase, C-terminal;IPR002655,Acyl-CoA oxidase;IPR001412,Aminoacyl-tRNA synthetase, class I	Acyl-CoA oxidase.	NA	2074|tRNA ligase activity|molecular_function|GO:0004812; 2653|ATP binding|molecular_function|GO:0005524; 3508|tRNA aminoacylation for protein translation|biological_process|GO:0006418; 1333|acyl-CoA oxidase activity|molecular_function|GO:0003997; 2892|peroxisome|cellular_component|GO:0005777; 3712|fatty acid beta-oxidation|biological_process|GO:0006635; 3218|electron transport|biological_process|…	-
XTROP0001S00013772	459283	ENSXETG00000016078	8	liver late down			-1.05		Hypothetical LOC496848. [Source:UniProtKB/TrEMBL;Acc:Q5M7M2]	IPR006090,Acyl-CoA dehydrogenase, C-terminal;IPR006091,Acyl-CoA dehydrogenase, central region;IPR006092,Acyl-CoA dehydrogenase, N-terminal;IPR006089,Acyl-CoA dehydrogenase	Isovaleryl-CoA dehydrogenase.	KOG0141|Isovaleryl-CoA dehydrogenase|Amino acid transport and metabolism |METABOLISM;KOG0141|Isovaleryl-CoA dehydrogenase|Lipid transport and metabolism |METABOLISM	1331|acyl-CoA dehydrogenase activity|molecular_function|GO:0003995; 3218|electron transport|biological_process|GO:0006118; 8235|oxidoreductase activity|molecular_function|GO:0016491; 5105|isovaleryl-CoA dehydrogenase activity|molecular_function|GO:0008470	-
XTROP0001S00062138	459292	ENSXETG00000026646	3	liver late down			-1.679		NA	IPR001605,Spectrin/pleckstrin-like;IPR001849,Pleckstrin-like;IPR001715,Calponin-like actin-binding;IPR002017,Spectrin repeat;IPR001589,Actin-binding, actinin-type	NA	KOG0517|Beta-spectrin|Cytoskeleton |CELLULAR PROCESSES AND SIGNALING	1126|actin binding|molecular_function|GO:0003779	-
XTROP0001S00010210	459292	ENSXETG00000026646	8	liver late down			-1.683		NA	IPR001605,Spectrin/pleckstrin-like;IPR001849,Pleckstrin-like;IPR001715,Calponin-like actin-binding;IPR002017,Spectrin repeat;IPR001589,Actin-binding, actinin-type	NA	KOG0517|Beta-spectrin|Cytoskeleton |CELLULAR PROCESSES AND SIGNALING	1126|actin binding|molecular_function|GO:0003779	-
XTROP0001S00003951	459336	ENSXETG00000014075	8	liver late down			-1.791		Hypothetical LOC496998. [Source:UniProtKB/TrEMBL;Acc:Q5HZU0]	IPR000863,Sulfotransferase	Aryl sulfotransferase.	NA	4799|sulfotransferase activity|molecular_function|GO:0008146; 1393|aryl sulfotransferase activity|molecular_function|GO:0004062	-
XTROP0001S00022571	459991	ENSXETG00000021645	8	liver late down			-1.858		Histidine ammonia-lyase. [Source:UniProtKB/TrEMBL;Acc:Q6DF42]	IPR001106,Phenylalanine/histidine ammonia-lyase;IPR005921,Histidine ammonia-lyase	Histidine ammonia-lyase.	KOG0222|Phenylalanine and histidine ammonia-lyase|Secondary metabolites biosynthesis, transport and catabolism |METABOLISM	5660|biosynthesis|biological_process|GO:0009058; 8008|ammonia ligase activity|molecular_function|GO:0016211; 1688|histidine ammonia-lyase activity|molecular_function|GO:0004397; 2855|cytoplasm|cellular_component|GO:0005737; 3627|histidine catabolism|biological_process|GO:0006548	-
XTROP0001S00007683	461258	ENSXETG00000028049	8	liver late down			-3.15		LOC496676 protein (Fragment). [Source:UniProtKB/TrEMBL;Acc:Q5M8W1]	IPR000940,Methyltransferase, NNMT/PNMT/TEMT	Nicotinamide N-methyltransferase.	NA	4820|methyltransferase activity|molecular_function|GO:0008168; 4768|nicotinamide N-methyltransferase activity|molecular_function|GO:0008112	-
XTROP0001S00008327	462231	ENSXETG00000003522	3	liver late down			-2.319		Selenoprotein P, plasma, 1. [Source:UniProtKB/TrEMBL;Acc:Q6DJ72]	IPR007671,Selenoprotein P, N-terminal	NA	NA	NA	-
XTROP0001S00033015	462231	ENSXETG00000003522	8	liver late down			-2.328		Selenoprotein P, plasma, 1. [Source:UniProtKB/TrEMBL;Acc:Q6DJ72]	IPR007671,Selenoprotein P, N-terminal	NA	NA	NA	-
XTROP0001S00007927	462402	ENSXETG00000017534	8	liver late down			-2.023		Hypothetical protein mgc108050. [Source:UniProtKB/TrEMBL;Acc:Q4VA88]	IPR002198,Short-chain dehydrogenase/reductase SDR;IPR002347,Glucose/ribitol dehydrogenase;IPR002539,MaoC-like dehydratase;IPR003033,Sterol-binding	Estradiol 17 beta-dehydrogenase.	NA	NA	-
XTROP0001S00064000	462921	ENSXETG00000018450	8	liver late down			-1.075		NA	NA	NA	NA	NA	-
XTROP0001S00001457	463825	ENSXETG00000014097	8	liver late down			-1.4		Retinoic acid receptor responder protein 1 (RAR-responsive protein TIG1)(Tazarotene-induced gene 1 protein) [Source:UniProtKB/Swiss-Prot;Acc:P49788]	IPR009684,Latexin;IPR000194,H+-transporting two-sector ATPase, alpha/beta subunit, central region	NA	NA	NA	-
XTROP0001S00063380	464079	NA	3	liver late down			-1.146		NA	IPR006099,Methylmalonyl-CoA mutase;IPR006158,Coenzyme B12-binding;IPR006159,Methylmalonyl-CoA mutase, C-terminal;IPR006098,Methylmalonyl-CoA mutase, N-terminal;IPR006100,Methylmalonyl-CoA mutase subfamily	Methylmalonyl-CoA mutase.	NA	NA	-
XTROP0001S00004328	464081	ENSXETG00000003678	8	liver late down			-1.498		NA	IPR001128,Cytochrome P450;IPR002401,E-class P450, group I	Unspecific monooxygenase.	NA	NA	-
XTROP0001S00014697	466725	ENSXETG00000018024	8	liver late down			-1.449		PX domain-containing protein C6orf145 [Source:UniProtKB/Swiss-Prot;Acc:Q5TGL8]	NA	NA	NA	NA	-
XTROP0001S00010815	468122	ENSXETG00000021961	8	liver late down			-1.236		Succinate-semialdehyde dehydrogenase, mitochondrial Precursor (EC 1.2.1.24)(NAD(+)-dependent succinic semialdehyde dehydrogenase)(Aldehyde dehydrogenase family 5 member A1) [Source:UniProtKB/Swiss-Prot;Acc:P51649]	IPR002086,Aldehyde dehydrogenase;IPR010102,Succinic semialdehyde dehydrogenase;IPR001865,Ribosomal protein S2	Succinate-semialdehyde dehydrogenase.	NA	1107|structural constituent of ribosome|molecular_function|GO:0003735; 2746|intracellular|cellular_component|GO:0005622; 2953|ribosome|cellular_component|GO:0005840; 3503|protein biosynthesis|biological_process|GO:0006412; 4804|metabolism|biological_process|GO:0008152; 8235|oxidoreductase activity|molecular_function|GO:0016491; 1360|aldehyde dehydrogenase activity|molecular_function|GO:0004028; 2…	-
XTROP0001S00017546	468665	NA	3	liver late down			-2.597		NA	IPR000001,Kringle;IPR001314,Peptidase S1A, chymotrypsin;IPR003966,Peptidase S1A, prothrombin;IPR001254,Peptidase S1, chymotrypsin;IPR001400,Somatotropin hormone	Plasmin.	NA	NA	-
XTROP0001S00031214	468665	NA	8	liver late down			-2.615		NA	IPR000001,Kringle;IPR001314,Peptidase S1A, chymotrypsin;IPR003966,Peptidase S1A, prothrombin;IPR001254,Peptidase S1, chymotrypsin;IPR001400,Somatotropin hormone	Plasmin.	NA	NA	-
XTROP0001S00047513	469652	NA	3	liver late down			-1.257		NA	NA	NA	NA	NA	-
XTROP0001S00022307	470448	ENSXETG00000016315	8	liver late down			-1.385		NA	IPR001478,PDZ/DHR/GLGF	NA	KOG3528|FOG: PDZ domain|Function unknown |POORLY CHARACTERIZED	NA	-
XTROP0001S00010135	471516	ENSXETG00000026816	8	liver late down			-1.688		NA	IPR004841,Amino acid permease-associated region;IPR002293,Amino acid/polyamine transporter I	NA	NA	NA	-
XTROP0001S00026782	472130	ENSXETG00000000849	8	liver late down			-1.01		NA	IPR001107,Band 7 protein	NA	NA	NA	-
XTROP0001S00023244	472419	ENSXETG00000024217	8	liver late down			-0.849		NA	NA	NA	KOG1366|Alpha-macroglobulin|Posttranslational modification, protein turnover, chaperones |CELLULAR PROCESSES AND SIGNALING	NA	-
XTROP0001S00007080	473133	NA	8	liver late down			-1.339		NA	IPR000940,Methyltransferase, NNMT/PNMT/TEMT;IPR001601,Generic methyltransferase	Nicotinamide N-methyltransferase.	NA	NA	-
XTROP0001S00006386	473320	ENSXETG00000007664	3	liver late down			-1.371		Hypothetical LOC496690. [Source:UniProtKB/TrEMBL;Acc:Q5M8U6]	IPR001129,Membrane-associated proteins in eicosanoid and glutathione metabolism (MAPEG)	Glutathione transferase.	NA	NA	-
XTROP0001S00042432	473320	ENSXETG00000007664	8	liver late down			-1.661		Hypothetical LOC496690. [Source:UniProtKB/TrEMBL;Acc:Q5M8U6]	IPR001129,Membrane-associated proteins in eicosanoid and glutathione metabolism (MAPEG)	Glutathione transferase.	NA	NA	-
XTROP0001S00003554	473421	NA	8	liver late down			-1.349		NA	IPR001128,Cytochrome P450;IPR002401,E-class P450, group I	Unspecific monooxygenase.	NA	NA	-
XTROP0001S00022610	474926	NA	8	liver late down			-1.051		NA	NA	NA	NA	NA	-
XTROP0001S00027675	476249	NA	8	liver late down			-2.158		NA	NA	NA	KOG4297|C-type lectin|Defense mechanisms |CELLULAR PROCESSES AND SIGNALING;KOG4297|C-type lectin|Signal transduction mechanisms |CELLULAR PROCESSES AND SIGNALING	NA	-
XTROP0001S00022037	477529	ENSXETG00000005789	3	liver late down			-1.531		NA	IPR007036,Succinylglutamate desuccinylase/aspartoacylase	Aspartoacylase.	NA	4804|metabolism|biological_process|GO:0008152; 8517|hydrolase activity, acting on ester bonds|molecular_function|GO:0016788;10624|aspartoacylase activity|molecular_function|GO:0019807	-
XTROP0001S00031891	477529	ENSXETG00000005789	8	liver late down			-1.624		NA	IPR007036,Succinylglutamate desuccinylase/aspartoacylase	Aspartoacylase.	NA	4804|metabolism|biological_process|GO:0008152; 8517|hydrolase activity, acting on ester bonds|molecular_function|GO:0016788;10624|aspartoacylase activity|molecular_function|GO:0019807	-
XTROP0001S00000862	477578	NA	3	liver late down			-1.289		NA	NA	NA	NA	NA	-
XTROP0001S00037725	477578	NA	8	liver late down			-1.631		NA	NA	NA	NA	NA	-
XTROP0001S00022436	477862	ENSXETG00000003301	8	liver late down			-1.758		NA	IPR001440,TPR repeat	NA	NA	NA	-
XTROP0001S00025174	477882	ENSXETG00000007932	3	liver late down			-1.127		NA	IPR006090,Acyl-CoA dehydrogenase, C-terminal;IPR006091,Acyl-CoA dehydrogenase, central region;IPR006092,Acyl-CoA dehydrogenase, N-terminal;IPR006089,Acyl-CoA dehydrogenase	Glutaryl-CoA dehydrogenase.	NA	NA	-
XTROP0001S00031780	477882	ENSXETG00000007932	8	liver late down			-1.23		NA	IPR006090,Acyl-CoA dehydrogenase, C-terminal;IPR006091,Acyl-CoA dehydrogenase, central region;IPR006092,Acyl-CoA dehydrogenase, N-terminal;IPR006089,Acyl-CoA dehydrogenase	Glutaryl-CoA dehydrogenase.	NA	NA	-
XTROP0001S00004366	478558	ENSXETG00000025317	8	liver late down			-1.78		Hypothetical protein MGC76066. [Source:UniProtKB/TrEMBL;Acc:Q6P342]	IPR007130,Diacylglycerol acyltransferase	NA	NA	NA	-
XTROP0001S00027278	NA	ENSXETG00000025817	3	liver late down			-1.678		Amine oxidase [flavin-containing] A (EC 1.4.3.4) (Monoamine oxidase type A) (MAO-A). [Source:UniProtKB/Swiss-Prot;Acc:P21397] [from human gene ENSG00000189221]	NA	NA	NA	NA	-
XTROP0001S00020918	NA	ENSXETG00000010241	3	liver late down			-1.515		Eukaryotic translation initiation factor 3 subunit A (eIF3a)(Eukaryotic translation initiation factor 3 subunit 10)(eIF-3-theta)(eIF3 p167)(eIF3 p180)(eIF3 p185) [Source:UniProtKB/Swiss-Prot;Acc:Q14152]	NA	NA	NA	NA	-
XTROP0001S00035832	NA	ENSXETG00000002376	3	liver late down			-1.209		Hypothetical protein. [Source:UniProtKB/TrEMBL;Acc:Q640T6]	NA	NA	NA	NA	-
XTROP0001S00032263	NA	ENSXETG00000027551	3	liver late down			-1.774		LOC394897 protein (Fragment). [Source:UniProtKB/TrEMBL;Acc:Q6P306]	NA	NA	NA	NA	-
XTROP0001S00063248	NA	ENSXETG00000027551	3	liver late down			-1.685		LOC394897 protein (Fragment). [Source:UniProtKB/TrEMBL;Acc:Q6P306]	NA	NA	NA	NA	-
XTROP0001S00010307	NA	ENSXETG00000008798	3	liver late down			-1.443		LOC548374 protein (Fragment). [Source:UniProtKB/TrEMBL;Acc:Q5FVX6]	NA	NA	NA	NA	-
XTROP0001S00058592	NA	ENSXETG00000002126	3	liver late down			-1.14		MGC79660 protein. [Source:UniProtKB/TrEMBL;Acc:Q6DFQ5]	NA	NA	NA	NA	-
XTROP0001S00048594	NA	ENSXETG00000001531	3	liver late down			-1.897		NA	NA	NA	NA	NA	-
XTROP0001S00031553	NA	ENSXETG00000002036	3	liver late down			-1.677		NA	NA	NA	NA	NA	-
XTROP0001S00030631	NA	ENSXETG00000024776	3	liver late down			-1.034		NA	NA	NA	NA	NA	-
XTROP0001S00035495	NA	ENSXETG00000025755	3	liver late down			-2.094		NA	NA	NA	NA	NA	-
XTROP0001S00001007	NA	NA	3	liver late down			-2.464		NA	NA	NA	NA	NA	-
XTROP0001S00030137	NA	NA	3	liver late down			-1.918		NA	NA	NA	NA	NA	-
XTROP0001S00030296	NA	NA	3	liver late down			-2.131		NA	NA	NA	NA	NA	-
XTROP0001S00030298	NA	NA	3	liver late down			-2.067		NA	NA	NA	NA	NA	-
XTROP0001S00030956	NA	NA	3	liver late down			-1.856		NA	NA	NA	NA	NA	-
XTROP0001S00031144	NA	NA	3	liver late down			-1.782		NA	NA	NA	NA	NA	-
XTROP0001S00031145	NA	NA	3	liver late down			-1.536		NA	NA	NA	NA	NA	-
XTROP0001S00031146	NA	NA	3	liver late down			-1.951		NA	NA	NA	NA	NA	-
XTROP0001S00031682	NA	NA	3	liver late down			-1.72		NA	NA	NA	NA	NA	-
XTROP0001S00031958	NA	NA	3	liver late down			-1.549		NA	NA	NA	NA	NA	-
XTROP0001S00032185	NA	NA	3	liver late down			-1.484		NA	NA	NA	NA	NA	-
XTROP0001S00033808	NA	NA	3	liver late down			-2.36		NA	NA	NA	NA	NA	-
XTROP0001S00033991	NA	NA	3	liver late down			-0.907		NA	NA	NA	NA	NA	-
XTROP0001S00033999	NA	NA	3	liver late down			-2.35		NA	NA	NA	NA	NA	-
XTROP0001S00034546	NA	NA	3	liver late down			-1.346		NA	NA	NA	NA	NA	-
XTROP0001S00034685	NA	NA	3	liver late down			-2.721		NA	NA	NA	NA	NA	-
XTROP0001S00034693	NA	NA	3	liver late down			-1.461		NA	NA	NA	NA	NA	-
XTROP0001S00034783	NA	NA	3	liver late down			-1.765		NA	NA	NA	NA	NA	-
XTROP0001S00034898	NA	NA	3	liver late down			-0.995		NA	NA	NA	NA	NA	-
XTROP0001S00034930	NA	NA	3	liver late down			-1.596		NA	NA	NA	NA	NA	-
XTROP0001S00034935	NA	NA	3	liver late down			-1.558		NA	NA	NA	NA	NA	-
XTROP0001S00034995	NA	NA	3	liver late down			-1.569		NA	NA	NA	NA	NA	-
XTROP0001S00035026	NA	NA	3	liver late down			-1.897		NA	NA	NA	NA	NA	-
XTROP0001S00035141	NA	NA	3	liver late down			-1.816		NA	NA	NA	NA	NA	-
XTROP0001S00035148	NA	NA	3	liver late down			-1.262		NA	NA	NA	NA	NA	-
XTROP0001S00035355	NA	NA	3	liver late down			-4.007		NA	NA	NA	NA	NA	-
XTROP0001S00035684	NA	NA	3	liver late down			-1.425		NA	NA	NA	NA	NA	-
XTROP0001S00035690	NA	NA	3	liver late down			-1.114		NA	NA	NA	NA	NA	-
XTROP0001S00035701	NA	NA	3	liver late down			-3.328		NA	NA	NA	NA	NA	-
XTROP0001S00035814	NA	NA	3	liver late down			-1.583		NA	NA	NA	NA	NA	-
XTROP0001S00036074	NA	NA	3	liver late down			-2.75		NA	NA	NA	NA	NA	-
XTROP0001S00036472	NA	NA	3	liver late down			-1.313		NA	NA	NA	NA	NA	-
XTROP0001S00036671	NA	NA	3	liver late down			-1.367		NA	NA	NA	NA	NA	-
XTROP0001S00036899	NA	NA	3	liver late down			-2.796		NA	NA	NA	NA	NA	-
XTROP0001S00037072	NA	NA	3	liver late down			-2.552		NA	NA	NA	NA	NA	-
XTROP0001S00037116	NA	NA	3	liver late down			-1.225		NA	NA	NA	NA	NA	-
XTROP0001S00037286	NA	NA	3	liver late down			-1.022		NA	NA	NA	NA	NA	-
XTROP0001S00037295	NA	NA	3	liver late down			-1.579		NA	NA	NA	NA	NA	-
XTROP0001S00037321	NA	NA	3	liver late down			-1		NA	NA	NA	NA	NA	-
XTROP0001S00037506	NA	NA	3	liver late down			-1.357		NA	NA	NA	NA	NA	-
XTROP0001S00037603	NA	NA	3	liver late down			-1.252		NA	NA	NA	NA	NA	-
XTROP0001S00038791	NA	NA	3	liver late down			-1.677		NA	NA	NA	NA	NA	-
XTROP0001S00039048	NA	NA	3	liver late down			-1.362		NA	NA	NA	NA	NA	-
XTROP0001S00039621	NA	NA	3	liver late down			-2.738		NA	NA	NA	NA	NA	-
XTROP0001S00040087	NA	NA	3	liver late down			-1.595		NA	NA	NA	NA	NA	-
XTROP0001S00040381	NA	NA	3	liver late down			-0.997		NA	NA	NA	NA	NA	-
XTROP0001S00040648	NA	NA	3	liver late down			-0.992		NA	NA	NA	NA	NA	-
XTROP0001S00040872	NA	NA	3	liver late down			-1.487		NA	NA	NA	NA	NA	-
XTROP0001S00041254	NA	NA	3	liver late down			-2.079		NA	NA	NA	NA	NA	-
XTROP0001S00041355	NA	NA	3	liver late down			-0.959		NA	NA	NA	NA	NA	-
XTROP0001S00041427	NA	NA	3	liver late down			-2.937		NA	NA	NA	NA	NA	-
XTROP0001S00041674	NA	NA	3	liver late down			-1.308		NA	NA	NA	NA	NA	-
XTROP0001S00041743	NA	NA	3	liver late down			-1.423		NA	NA	NA	NA	NA	-
XTROP0001S00042103	NA	NA	3	liver late down			-1.31		NA	NA	NA	NA	NA	-
XTROP0001S00042482	NA	NA	3	liver late down			-1.373		NA	NA	NA	NA	NA	-
XTROP0001S00043038	NA	NA	3	liver late down			-1.566		NA	NA	NA	NA	NA	-
XTROP0001S00043085	NA	NA	3	liver late down			-1.33		NA	NA	NA	NA	NA	-
XTROP0001S00043974	NA	NA	3	liver late down			-1.392		NA	NA	NA	NA	NA	-
XTROP0001S00047096	NA	NA	3	liver late down			-1.422		NA	NA	NA	NA	NA	-
XTROP0001S00047360	NA	NA	3	liver late down			-1.104		NA	NA	NA	NA	NA	-
XTROP0001S00048219	NA	NA	3	liver late down			-1.07		NA	NA	NA	NA	NA	-
XTROP0001S00048990	NA	NA	3	liver late down			-1.339		NA	NA	NA	NA	NA	-
XTROP0001S00049894	NA	NA	3	liver late down			-1.783		NA	NA	NA	NA	NA	-
XTROP0001S00050584	NA	NA	3	liver late down			-1.799		NA	NA	NA	NA	NA	-
XTROP0001S00050858	NA	NA	3	liver late down			-1.228		NA	NA	NA	NA	NA	-
XTROP0001S00051744	NA	NA	3	liver late down			-1.258		NA	NA	NA	NA	NA	-
XTROP0001S00052567	NA	NA	3	liver late down			-1.127		NA	NA	NA	NA	NA	-
XTROP0001S00052723	NA	NA	3	liver late down			-1.678		NA	NA	NA	NA	NA	-
XTROP0001S00053695	NA	NA	3	liver late down			-1.553		NA	NA	NA	NA	NA	-
XTROP0001S00053738	NA	NA	3	liver late down			-1.439		NA	NA	NA	NA	NA	-
XTROP0001S00053739	NA	NA	3	liver late down			-1.545		NA	NA	NA	NA	NA	-
XTROP0001S00053740	NA	NA	3	liver late down			-1.908		NA	NA	NA	NA	NA	-
XTROP0001S00054048	NA	NA	3	liver late down			-1.013		NA	NA	NA	NA	NA	-
XTROP0001S00055552	NA	NA	3	liver late down			-1.119		NA	NA	NA	NA	NA	-
XTROP0001S00056996	NA	NA	3	liver late down			-1.494		NA	NA	NA	NA	NA	-
XTROP0001S00057053	NA	NA	3	liver late down			-3.203		NA	NA	NA	NA	NA	-
XTROP0001S00057412	NA	NA	3	liver late down			-1.229		NA	NA	NA	NA	NA	-
XTROP0001S00057514	NA	NA	3	liver late down			-2.206		NA	NA	NA	NA	NA	-
XTROP0001S00057651	NA	NA	3	liver late down			-1.387		NA	NA	NA	NA	NA	-
XTROP0001S00058052	NA	NA	3	liver late down			-1.059		NA	NA	NA	NA	NA	-
XTROP0001S00058053	NA	NA	3	liver late down			-1.222		NA	NA	NA	NA	NA	-
XTROP0001S00058054	NA	NA	3	liver late down			-1.084		NA	NA	NA	NA	NA	-
XTROP0001S00058110	NA	NA	3	liver late down			-1.184		NA	NA	NA	NA	NA	-
XTROP0001S00058264	NA	NA	3	liver late down			-1.29		NA	NA	NA	NA	NA	-
XTROP0001S00058368	NA	NA	3	liver late down			-1.75		NA	NA	NA	NA	NA	-
XTROP0001S00058467	NA	NA	3	liver late down			-1.78		NA	NA	NA	NA	NA	-
XTROP0001S00058513	NA	NA	3	liver late down			-1.048		NA	NA	NA	NA	NA	-
XTROP0001S00060229	NA	NA	3	liver late down			-1.874		NA	NA	NA	NA	NA	-
XTROP0001S00061951	NA	NA	3	liver late down			-1.534		NA	NA	NA	NA	NA	-
XTROP0001S00062173	NA	NA	3	liver late down			-2.276		NA	NA	NA	NA	NA	-
XTROP0001S00062186	NA	NA	3	liver late down			-1.78		NA	NA	NA	NA	NA	-
XTROP0001S00062695	NA	NA	3	liver late down			-1.502		NA	NA	NA	NA	NA	-
XTROP0001S00062826	NA	NA	3	liver late down			-2.446		NA	NA	NA	NA	NA	-
XTROP0001S00063324	NA	NA	3	liver late down			-2.327		NA	NA	NA	NA	NA	-
XTROP0001S00063325	NA	NA	3	liver late down			-2.449		NA	NA	NA	NA	NA	-
XTROP0001S00063326	NA	NA	3	liver late down			-2.443		NA	NA	NA	NA	NA	-
XTROP0001S00063327	NA	NA	3	liver late down			-2.56		NA	NA	NA	NA	NA	-
XTROP0001S00063488	NA	NA	3	liver late down			-1.468		NA	NA	NA	NA	NA	-
XTROP0001S00063624	NA	NA	3	liver late down			-1.426		NA	NA	NA	NA	NA	-
XTROP0001S00063997	NA	NA	3	liver late down			-1.408		NA	NA	NA	NA	NA	-
XTROP0001S00064040	NA	NA	3	liver late down			-2.324		NA	NA	NA	NA	NA	-
XTROP0001S00064431	NA	NA	3	liver late down			-1.085		NA	NA	NA	NA	NA	-
XTROP0001S00064463	NA	NA	3	liver late down			-1.595		NA	NA	NA	NA	NA	-
XTROP0001S00064522	NA	NA	3	liver late down			-1.633		NA	NA	NA	NA	NA	-
XTROP0001S00064621	NA	NA	3	liver late down			-1.665		NA	NA	NA	NA	NA	-
XTROP0001S00065743	NA	NA	3	liver late down			-1.916		NA	NA	NA	NA	NA	-
XTROP0001S00065806	NA	NA	3	liver late down			-1.364		NA	NA	NA	NA	NA	-
XTROP0001S00066162	NA	NA	3	liver late down			-2.29		NA	NA	NA	NA	NA	-
XTROP0001S00066163	NA	NA	3	liver late down			-2.164		NA	NA	NA	NA	NA	-
XTROP0001S00061232	NA	ENSXETG00000004333	3	liver late down			-1.138		Progesterone receptor membrane component 1. [Source:UniProtKB/TrEMBL;Acc:Q6DF17]	NA	NA	NA	NA	-
XTROP0001S00061392	NA	ENSXETG00000009055	3	liver late down			-1.965		UDP glycosyltransferase 3 family, polypeptide A2 [Source:RefSeq_peptide;Acc:NP_777574] [from human gene ENSG00000168671]	NA	NA	NA	NA	-
XTROP0001S00061394	NA	ENSXETG00000009055	3	liver late down			-2.075		UDP glycosyltransferase 3 family, polypeptide A2 [Source:RefSeq_peptide;Acc:NP_777574] [from human gene ENSG00000168671]	NA	NA	NA	NA	-
XTROP0001S00044044	NA	ENSXETG00000024432	3	liver late down			-1.23		Zinc finger protein GLIS2 (GLI-similar 2)(Neuronal Krueppel-like protein) [Source:UniProtKB/Swiss-Prot;Acc:Q9BZE0]	NA	NA	NA	NA	-
XTROP0001S00032248	NA	ENSXETG00000016420	3	liver late down			-1.727		NA	NA	NA	NA	NA	-
XTROP0001S00062526	276369	ENSXETG00000008241	3	liver late down, skin late up			-1.65	1.538	Arginase, liver. [Source:UniProtKB/TrEMBL;Acc:Q6DIU5]	IPR005924,Arginase;IPR006035,Arginase/agmatinase/formiminoglutamase	Arginase.	KOG2965|Arginase|Amino acid transport and metabolism |METABOLISM	1384|arginase activity|molecular_function|GO:0004053; 3606|arginine catabolism|biological_process|GO:0006527; 1170|catalytic activity|molecular_function|GO:0003824	-
XTROP0001S00020150	27486	NA	8	liver late up			1.873		NA	NA	NA	NA	NA	-
XTROP0001S00006788	124389	NA	8	liver late up			1.309		NA	NA	NA	KOG1721|FOG: Zn-finger|General function prediction only |POORLY CHARACTERIZED	NA	-
XTROP0001S00008934	137528	NA	8	liver late up			1.419		NA	IPR000884,Thrombospondin, type I;IPR006207,Cystine knot, C-terminal	NA	NA	NA	-
XTROP0001S00024852	137741	NA	8	liver late up			1.299		NA	NA	NA	KOG3627|Trypsin|Amino acid transport and metabolism |METABOLISM	NA	-
XTROP0001S00020152	147284	ENSXETG00000019026	8	liver late up			1.275		Mannoside acetylglucosaminyltransferase 1. [Source:UniProtKB/TrEMBL;Acc:Q5M7Q5]	IPR004139,Glycosyl transferase, family 13	Alpha-1,3-mannosyl-glycoprotein beta-1,2-N- acetylglucosaminyltransferase.	NA	133|Golgi membrane|cellular_component|GO:0000139; 1173|alpha-1,3-mannosylglycoprotein 2-beta-N-acetylglucosaminyltransferase activity|molecular_function|GO:0003827; 3568|N-linked glycosylation|biological_process|GO:0006487	-
XTROP0001S00015759	148362	ENSXETG00000009374	8	liver late up			0.903		Ncf4-prov protein (Neutrophil cytosolic factor 4, 40kDa). [Source:UniProtKB/TrEMBL;Acc:Q569D9]	IPR001452,SH3;IPR000919,Neutrophil cytosol factor P40;IPR000108,Neutrophil cytosol factor 2;IPR001683,Phox-like;IPR011511,Variant SH3	NA	NA	NA	-
XTROP0001S00019450	148522	ENSXETG00000023744	8	liver late up			1.081		Protein tyrosine phosphatase type IVA 3 (EC 3.1.3.48)(Protein-tyrosine phosphatase 4a3)(Protein-tyrosine phosphatase of regenerating liver 3)(PRL-3)(PRL-R) [Source:UniProtKB/Swiss-Prot;Acc:O75365]	IPR000242,Tyrosine specific protein phosphatase;IPR003595,Protein tyrosine phosphatase, catalytic region;IPR000387,Tyrosine specific protein phosphatase and dual specificity protein phosphatase	Protein-tyrosine-phosphatase.	NA	NA	-
XTROP0001S00035932	150099	ENSXETG00000027990	3	liver late up			0.987		MGC108229 protein. [Source:UniProtKB/TrEMBL;Acc:Q5EAK8]	NA	NA	NA	NA	-
XTROP0001S00030976	151073	NA	3	liver late up			1.646		NA	IPR002112,Transcription factor Jun;IPR004827,Basic-leucine zipper (bZIP) transcription factor;IPR005643,Jun-like transcription factor	NA	NA	1076|transcription factor activity|molecular_function|GO:0003700; 2757|nucleus|cellular_component|GO:0005634; 3449|regulation of transcription, DNA-dependent|biological_process|GO:0006355; 1056|DNA binding|molecular_function|GO:0003677	-
XTROP0001S00014260	151180	ENSXETG00000020332	8	liver late up			1.443		Hypothetical LOC496666. [Source:UniProtKB/TrEMBL;Acc:Q5M8X2]	IPR003193,ADP-ribosyl cyclase (CD38/157)	NAD(+) nucleosidase.	NA	1292|NAD+ nucleosidase activity|molecular_function|GO:0003953	-
XTROP0001S00012234	151770	ENSXETG00000014449	8	liver late up			2.077		Hypoxia-inducible factor 1 alpha (HIF-1 alpha)(HIF1 alpha)(ARNT-interacting protein)(Member of PAS protein 1)(Basic-helix-loop-helix-PAS protein MOP1) [Source:UniProtKB/Swiss-Prot;Acc:Q16665]	IPR001321,Hypoxia-inducible factor-1 alpha;IPR001092,Basic helix-loop-helix dimerisation region bHLH;IPR001610,PAC motif;IPR000014,PAS;NULL,NULL	NA	KOG3558|Hypoxia-inducible factor 1/Neuronal PAS domain protein NPAS1|Transcription |INFORMATION STORAGE AND PROCESSING;KOG3558|Hypoxia-inducible factor 1/Neuronal PAS domain protein NPAS1|Signal transduction mechanisms |CELLULAR PROCESSES AND SIGNALING	NA	-
XTROP0001S00024355	167905	ENSXETG00000000073	8	liver late up			1.272		NA	IPR008139,Saposin B	NA	NA	NA	-
XTROP0001S00010155	171834	NA	8	liver late up			1.4		NA	IPR003599,Immunoglobulin subtype;IPR007110,Immunoglobulin-like;IPR000005,Helix-turn-helix, AraC type	NA	NA	1076|transcription factor activity|molecular_function|GO:0003700; 2746|intracellular|cellular_component|GO:0005622; 3449|regulation of transcription, DNA-dependent|biological_process|GO:0006355	-
XTROP0001S00008729	172589	ENSXETG00000000804	8	liver late up			1.46		MGC107826 protein. [Source:UniProtKB/TrEMBL;Acc:Q5FW38]	IPR010533,Vertebrate interleukin-3 regulated transcription factor;IPR004827,Basic-leucine zipper (bZIP) transcription factor	NA	NA	1056|DNA binding|molecular_function|GO:0003677; 2757|nucleus|cellular_component|GO:0005634; 3449|regulation of transcription, DNA-dependent|biological_process|GO:0006355	-
XTROP0001S00018347	175567	ENSXETG00000013395	8	liver late up			1.772		NA	IPR002110,Ankyrin;IPR008347,Vanilloid receptor;IPR008348,Vanilloid receptor 2;IPR005821,Ion transport protein;IPR002111,Cation (not K+) channel, TM region	NA	NA	2485|cation channel activity|molecular_function|GO:0005261; 3881|cation transport|biological_process|GO:0006812; 7826|membrane|cellular_component|GO:0016020; 2451|ion channel activity|molecular_function|GO:0005216; 3880|ion transport|biological_process|GO:0006811	-
XTROP0001S00011761	185418	ENSXETG00000023902	8	liver late up			1.477		Solute carrier family 2, facilitated glucose transporter member 14 (Glucose transporter type 14). [Source:UniProtKB/Swiss-Prot;Acc:Q8TDB8] [from human gene ENSG00000173262]	IPR003663,Sugar transporter;IPR000803,Facilitated glucose transporter;IPR002945,Glucose transporter GLUT3, type 3;IPR005828,General substrate transporter;IPR007114,Major facilitator superfamily;IPR005829,Sugar transporter superfamily	L-arabinose isomerase.	NA	2557|glucose transporter activity|molecular_function|GO:0005355; 3879|transport|biological_process|GO:0006810; 7826|membrane|cellular_component|GO:0016020; 2553|sugar porter activity|molecular_function|GO:0005351; 5260|carbohydrate transport|biological_process|GO:0008643; 2450|transporter activity|molecular_function|GO:0005215; 7827|integral to membrane|cellular_component|GO:0016021; 5345|L-arabi…	-
XTROP0001S00007211	188949	ENSXETG00000026981	8	liver late up			1.384		Elastase-3A precursor (EC 3.4.21.70) (Elastase IIIA) (Protease E). [Source:UniProtKB/Swiss-Prot;Acc:P09093] [from human gene ENSG00000142789]	IPR001314,Peptidase S1A, chymotrypsin;IPR001254,Peptidase S1, chymotrypsin	Pancreatic endopeptidase E.	NA	1596|trypsin activity|molecular_function|GO:0004295; 3588|proteolysis and peptidolysis|biological_process|GO:0006508; 1579|chymotrypsin activity|molecular_function|GO:0004263	-
XTROP0001S00004965	197103	ENSXETG00000004206	8	liver late up			2.119		Sodium/glucose cotransporter 1 (Na(+)/glucose cotransporter 1) (High affinity sodium-glucose cotransporter). [Source:UniProtKB/Swiss-Prot;Acc:P13866] [from human gene ENSG00000100170]	IPR001734,Na+/solute symporter	NA	NA	NA	-
XTROP0001S00021178	212375	ENSXETG00000011350	8	liver late up			1.715		Tumor necrosis factor receptor superfamily member 12A Precursor (Fibroblast growth factor-inducible immediate-early response protein 14)(FGF-inducible 14)(Tweak-receptor)(TweakR)(CD266 antigen) [Source:UniProtKB/Swiss-Prot;Acc:Q9NP84]	NA	NA	NA	NA	-
XTROP0001S00061933	267163	ENSXETG00000024588	3	liver late up			1.948		Glucose-6-phosphatase, catalytic (Glycogen storage disease type I, von Gierke disease). [Source:UniProtKB/TrEMBL;Acc:Q6DJS1]	IPR000326,Phosphoesterase, PA-phosphatase related	Glucose-6-phosphatase.	NA	NA	-
XTROP0001S00011688	268191	ENSXETG00000010075	8	liver late up			1.235		Hypoxia up-regulated protein 1 Precursor (150 kDa oxygen-regulated protein)(Orp150) [Source:UniProtKB/Swiss-Prot;Acc:Q9Y4L1]	IPR001023,Heat shock protein Hsp70	NA	NA	NA	-
XTROP0001S00016615	275038	NA	8	liver late up			1.186		NA	IPR000276,Rhodopsin-like GPCR superfamily	Sphingomyelin phosphodiesterase.	KOG3656|FOG: 7 transmembrane receptor|General function prediction only |POORLY CHARACTERIZED	NA	-
XTROP0001S00005703	276510	ENSXETG00000017992	8	liver late up			1.185		NA	IPR000759,Adrenodoxin reductase;IPR002937,Amine oxidase;IPR000205,NAD-binding site	Polyamine oxidase.	KOG0685|Flavin-containing amine oxidase|Coenzyme transport and metabolism |METABOLISM	NA	-
XTROP0001S00008147	277843	NA	3	liver late up			1.768		NA	IPR002044,Glycoside hydrolase, starch-binding;IPR004129,Glycerophosphoryl diester phosphodiesterase	NA	NA	1170|catalytic activity|molecular_function|GO:0003824; 3077|carbohydrate metabolism|biological_process|GO:0005975; 3173|glycerol metabolism|biological_process|GO:0006071; 5496|glycerophosphodiester phosphodiesterase activity|molecular_function|GO:0008889	-
XTROP0001S00064115	277843	NA	8	liver late up			1.606		NA	IPR002044,Glycoside hydrolase, starch-binding;IPR004129,Glycerophosphoryl diester phosphodiesterase	NA	NA	1170|catalytic activity|molecular_function|GO:0003824; 3077|carbohydrate metabolism|biological_process|GO:0005975; 3173|glycerol metabolism|biological_process|GO:0006071; 5496|glycerophosphodiester phosphodiesterase activity|molecular_function|GO:0008889	-
XTROP0001S00018104	282101	ENSXETG00000010847	8	liver late up			1.801		Pancreatic alpha-amylase precursor (EC 3.2.1.1) (PA) (1,4-alpha-D- glucan glucanohydrolase). [Source:UniProtKB/Swiss-Prot;Acc:P04746] [from human gene ENSG00000196318]	IPR006046,Glycoside hydrolase family 13;IPR006047,Alpha amylase, catalytic region;IPR006048,Alpha amylase, C-terminal all-beta;IPR006589,Alpha amylase, catalytic subdomain	Alpha-amylase.	NA	NA	-
XTROP0001S00009362	282790	ENSXETG00000017653	8	liver late up			2.043		L-serine dehydratase (EC 4.3.1.17)(L-serine deaminase) [Source:UniProtKB/Swiss-Prot;Acc:P20132]	IPR001926,Pyridoxal-5'-phosphate-dependent enzyme, beta subunit;IPR000634,Serine/threonine dehydratase, pyridoxal-phosphate-binding site	NA	NA	3599|amino acid metabolism|biological_process|GO:0006520; 1170|catalytic activity|molecular_function|GO:0003824; 4804|metabolism|biological_process|GO:0008152; 1281|L-serine ammonia-lyase activity|molecular_function|GO:0003941	-
XTROP0001S00004198	287154	ENSXETG00000015448	8	liver late up			1.678		Plasminogen activator inhibitor 1 Precursor (PAI-1)(PAI)(Endothelial plasminogen activator inhibitor) [Source:UniProtKB/Swiss-Prot;Acc:P05121]	IPR000215,Proteinase inhibitor I4, serpin	NA	NA	2128|serine-type endopeptidase inhibitor activity|molecular_function|GO:0004867	-
XTROP0001S00018439	287936	ENSXETG00000016838	8	liver late up			2.584		78 kDa glucose-regulated protein Precursor (GRP 78)(Heat shock 70 kDa protein 5)(Immunoglobulin heavy chain-binding protein)(BiP)(Endoplasmic reticulum lumenal Ca(2+)-binding protein grp78) [Source:UniProtKB/Swiss-Prot;Acc:P11021]	IPR001023,Heat shock protein Hsp70;IPR000886,Endoplasmic reticulum targeting sequence	NA	NA	NA	-
XTROP0001S00015349	290443	ENSXETG00000024469	3	liver late up			4.119		Microfibril-associated glycoprotein 4 precursor. [Source:UniProtKB/Swiss-Prot;Acc:P55083] [from human gene ENSG00000166482]	IPR002181,Fibrinogen, beta/gamma chain, C-terminal globular	NA	KOG2579|Ficolin and related extracellular proteins|General function prediction only |POORLY CHARACTERIZED	NA	-
XTROP0001S00030327	290443	NA	8	liver late up			2.701		NA	IPR002181,Fibrinogen, beta/gamma chain, C-terminal globular	NA	KOG2579|Ficolin and related extracellular proteins|General function prediction only |POORLY CHARACTERIZED	NA	-
XTROP0001S00000517	291378	NA	8	liver late up			1.368		NA	IPR001190,Speract/scavenger receptor;IPR008160,Collagen triple helix repeat	NA	KOG3544|Collagens (type IV and type XIII), and related proteins|Extracellular structures |CELLULAR PROCESSES AND SIGNALING	NA	-
XTROP0001S00018467	292069	ENSXETG00000019028	3	liver late up			1.866		Pglyrp1-prov protein. [Source:UniProtKB/TrEMBL;Acc:Q5BKE6]	IPR002502,N-acetylmuramoyl-L-alanine amidase, family 2;IPR006619,Animal peptidoglycan recognition protein PGRP	NA	NA	NA	-
XTROP0001S00042399	292069	ENSXETG00000019028	8	liver late up			2.246		Pglyrp1-prov protein. [Source:UniProtKB/TrEMBL;Acc:Q5BKE6]	IPR002502,N-acetylmuramoyl-L-alanine amidase, family 2;IPR006619,Animal peptidoglycan recognition protein PGRP	NA	NA	NA	-
XTROP0001S00056997	292797	NA	3	liver late up			1.299		NA	IPR002398,Peptidase C14, caspase precursor, p45;IPR001309,Caspase-1, p20;IPR002138,Caspase-1, p10	Cysteine endopeptidases.	NA	NA	-
XTROP0001S00031691	293522	ENSXETG00000005738	3	liver late up			1.419		Dexamethasone-induced Ras-related protein 1 Precursor (Activator of G-protein signaling 1) [Source:UniProtKB/Swiss-Prot;Acc:Q9Y272]	IPR001806,Ras GTPase;IPR003577,Ras small GTPase, Ras type;IPR003578,Ras small GTPase, Rho type;IPR003579,Ras small GTPase, Rab type;IPR002041,GTP-binding nuclear protein Ran;IPR005225,Small GTP-binding protein domain	NA	NA	NA	-
XTROP0001S00000571	294268	ENSXETG00000023416	8	liver late up			2.312		Tyrosine aminotransferase. [Source:UniProtKB/TrEMBL;Acc:Q6DID9]	IPR001176,1-aminocyclopropane-1-carboxylate synthase;IPR004839,Aminotransferase, class I and II;IPR005957,Animal tyrosine aminotransferase;IPR005958,Tyrosine/nicotianamine aminotransferase;IPR004838,Aminotransferases class-I pyridoxal-phosphate-binding site	Tyrosine aminotransferase.	KOG0259|Tyrosine aminotransferase|Amino acid transport and metabolism |METABOLISM	NA	-
XTROP0001S00062976	294791	ENSXETG00000012392	3	liver late up			1.399		NA	IPR004038,Ribosomal protein L7Ae/L30e/S12e/Gadd45	NA	KOG3406|40S ribosomal protein S12|Translation, ribosomal structure and biogenesis |INFORMATION STORAGE AND PROCESSING	NA	-
XTROP0001S00024707	294867	ENSXETG00000025507	8	liver late up			0.976		Ethylmalonic encephalopathy 1. [Source:UniProtKB/TrEMBL;Acc:Q6DJA2]	IPR001279,Beta-lactamase-like	Hydroxyacylglutathione hydrolase.	NA	NA	-
XTROP0001S00011079	296113	ENSXETG00000027271	8	liver late up			2.762		Hypothetical LOC496737. [Source:UniProtKB/TrEMBL;Acc:Q5M8J3]	IPR001759,Pentaxin	NA	NA	NA	-
XTROP0001S00019103	297184	ENSXETG00000012286	8	liver late up			1.242		Hypothetical protein MGC107842. [Source:UniProtKB/TrEMBL;Acc:Q3SYP1]	IPR004827,Basic-leucine zipper (bZIP) transcription factor	NA	KOG3119|Basic region leucine zipper transcription factor|Transcription |INFORMATION STORAGE AND PROCESSING	1056|DNA binding|molecular_function|GO:0003677; 2757|nucleus|cellular_component|GO:0005634; 3449|regulation of transcription, DNA-dependent|biological_process|GO:0006355	-
XTROP0001S00006360	297332	ENSXETG00000015656	3	liver late up			2.69		Hypothetical protein MGC107897. [Source:UniProtKB/TrEMBL;Acc:Q499C6]	IPR000716,Thyroglobulin type-1;IPR000867,Insulin-like growth factor-binding protein, IGFBP;IPR009168,Insulin-like growth factor binding protein	NA	NA	654|regulation of cell growth|biological_process|GO:0001558; 2649|insulin-like growth factor binding|molecular_function|GO:0005520; 2700|extracellular region|cellular_component|GO:0005576	-
XTROP0001S00062167	297332	ENSXETG00000015656	8	liver late up			2.698		Hypothetical protein MGC107897. [Source:UniProtKB/TrEMBL;Acc:Q499C6]	IPR000716,Thyroglobulin type-1;IPR000867,Insulin-like growth factor-binding protein, IGFBP;IPR009168,Insulin-like growth factor binding protein	NA	NA	654|regulation of cell growth|biological_process|GO:0001558; 2649|insulin-like growth factor binding|molecular_function|GO:0005520; 2700|extracellular region|cellular_component|GO:0005576	-
XTROP0001S00001003	297399	ENSXETG00000000682	8	liver late up			1.63		Inactive L-threonine 3-dehydrogenase, mitochondrial Precursor [Source:UniProtKB/Swiss-Prot;Acc:Q8IZJ6]	NA	NA	KOG2774|NAD dependent epimerase|General function prediction only |POORLY CHARACTERIZED	NA	-
XTROP0001S00023137	298459	NA	3	liver late up			3.244		NA	NA	NA	NA	NA	-
XTROP0001S00030042	298459	NA	8	liver late up			2.562		NA	NA	NA	NA	NA	-
XTROP0001S00001483	299097	ENSXETG00000006697	3	liver late up			3.519		Early growth response protein 1 (EGR-1)(Protein Krox-24)(Transcription factor Zif268)(Nerve growth factor-induced protein A)(NGFI-A)(Transcription factor ETR103)(Zinc finger protein 225)(AT225) [Source:UniProtKB/Swiss-Prot;Acc:P18146]	IPR007087,Zn-finger, C2H2 type	NA	NA	NA	-
XTROP0001S00031113	299097	ENSXETG00000006697	8	liver late up			3.501		Early growth response protein 1 (EGR-1)(Protein Krox-24)(Transcription factor Zif268)(Nerve growth factor-induced protein A)(NGFI-A)(Transcription factor ETR103)(Zinc finger protein 225)(AT225) [Source:UniProtKB/Swiss-Prot;Acc:P18146]	IPR007087,Zn-finger, C2H2 type	NA	NA	NA	-
XTROP0001S00026560	299140	ENSXETG00000012205	3	liver late up			1.792		ERO1-like protein alpha Precursor (ERO1-Lalpha)(ERO1-L)(EC 1.8.4.-)(Oxidoreductin-1-Lalpha)(Endoplasmic oxidoreductin-1-like protein) [Source:UniProtKB/Swiss-Prot;Acc:Q96HE7]	IPR007266,Endoplasmic reticulum oxidoreductin 1;IPR010916,TonB box, N-terminal	Oxidoreductases.	NA	NA	-
XTROP0001S00031648	299140	ENSXETG00000012205	8	liver late up			2.034		ERO1-like protein alpha Precursor (ERO1-Lalpha)(ERO1-L)(EC 1.8.4.-)(Oxidoreductin-1-Lalpha)(Endoplasmic oxidoreductin-1-like protein) [Source:UniProtKB/Swiss-Prot;Acc:Q96HE7]	IPR007266,Endoplasmic reticulum oxidoreductin 1;IPR010916,TonB box, N-terminal	Oxidoreductases.	NA	NA	-
XTROP0001S00027327	306116	ENSXETG00000004206	8	liver late up			2.035		Sodium/glucose cotransporter 1 (Na(+)/glucose cotransporter 1) (High affinity sodium-glucose cotransporter). [Source:UniProtKB/Swiss-Prot;Acc:P13866] [from human gene ENSG00000100170]	IPR001734,Na+/solute symporter	NA	NA	NA	-
XTROP0001S00020765	309572	ENSXETG00000006998	8	liver late up			1.734		NF-kappa-B inhibitor zeta (I-kappa-B-zeta)(IkappaBzeta)(IkB-zeta)(Molecule possessing ankyrin repeats induced by lipopolysaccharide)(MAIL)(IL-1 inducible nuclear ankyrin-repeat protein)(INAP) [Source:UniProtKB/Swiss-Prot;Acc:Q9BYH8]	IPR002110,Ankyrin	NA	NA	NA	-
XTROP0001S00000961	309732	ENSXETG00000006998	8	liver late up			1.154		NF-kappa-B inhibitor zeta (I-kappa-B-zeta)(IkappaBzeta)(IkB-zeta)(Molecule possessing ankyrin repeats induced by lipopolysaccharide)(MAIL)(IL-1 inducible nuclear ankyrin-repeat protein)(INAP) [Source:UniProtKB/Swiss-Prot;Acc:Q9BYH8]	IPR002110,Ankyrin	NA	NA	NA	-
XTROP0001S00031232	312547	ENSXETG00000001263	8	liver late up			2.684		Methionine adenosyltransferase II, alpha. [Source:UniProtKB/TrEMBL;Acc:Q6P1T2]	IPR002133,S-adenosylmethionine synthetase	Methionine adenosyltransferase.	KOG1506|S-adenosylmethionine synthetase|Coenzyme transport and metabolism |METABOLISM	NA	-
XTROP0001S00017889	324416	ENSXETG00000003541	8	liver late up			1.398		NA	IPR008161,Collagen helix repeat;IPR001304,C-type lectin;IPR008160,Collagen triple helix repeat	NA	NA	NA	-
XTROP0001S00014167	324426	NA	8	liver late up			2.437		NA	IPR008161,Collagen helix repeat;IPR008160,Collagen triple helix repeat	NA	KOG3544|Collagens (type IV and type XIII), and related proteins|Extracellular structures |CELLULAR PROCESSES AND SIGNALING	NA	-
XTROP0001S00010900	326142	ENSXETG00000003976	8	liver late up			1.233		NA	IPR001759,Pentaxin	NA	NA	NA	-
XTROP0001S00000953	326760	ENSXETG00000004850	8	liver late up			1.481		MGC107893 protein. [Source:UniProtKB/TrEMBL;Acc:Q5BKL6]	IPR004827,Basic-leucine zipper (bZIP) transcription factor	NA	KOG3119|Basic region leucine zipper transcription factor|Transcription |INFORMATION STORAGE AND PROCESSING	NA	-
XTROP0001S00010442	328617	NA	8	liver late up			1.495		NA	NA	NA	NA	NA	-
XTROP0001S00027091	337634	ENSXETG00000000740	8	liver late up			1.04		Caspase recruitment domain-containing protein 9 (hCARD9) [Source:UniProtKB/Swiss-Prot;Acc:Q9H257]	IPR001315,CARD interaction region	NA	NA	2644|protein binding|molecular_function|GO:0005515; 2746|intracellular|cellular_component|GO:0005622;13536|regulation of apoptosis|biological_process|GO:0042981	-
XTROP0001S00005251	344872	ENSXETG00000007482	3	liver late up			2.254		Beta-microseminoprotein precursor (Prostate secreted seminal plasma protein) (Prostate secretory protein PSP94) (PSP-94) (Seminal plasma beta-inhibin) (Immunoglobulin binding factor) (IGBF) (PN44). [Source:UniProtKB/Swiss-Prot;Acc:P08118] [from human gene ENSG00000138294]	IPR008735,Beta-microseminoprotein	NA	NA	NA	-
XTROP0001S00034282	344872	ENSXETG00000007482	8	liver late up			2.311		Beta-microseminoprotein precursor (Prostate secreted seminal plasma protein) (Prostate secretory protein PSP94) (PSP-94) (Seminal plasma beta-inhibin) (Immunoglobulin binding factor) (IGBF) (PN44). [Source:UniProtKB/Swiss-Prot;Acc:P08118] [from human gene ENSG00000138294]	IPR008735,Beta-microseminoprotein	NA	NA	NA	-
XTROP0001S00021428	359450	ENSXETG00000012512	8	liver late up			1.417		Glutamine synthetase (GS)(EC 6.3.1.2)(Glutamate--ammonia ligase) [Source:UniProtKB/Swiss-Prot;Acc:P15104]	IPR008146,Glutamine synthetase, catalytic region;IPR008147,Glutamine synthetase, beta-Grasp	Glutamate--ammonia ligase.	KOG0683|Glutamine synthetase|Amino acid transport and metabolism |METABOLISM	NA	-
XTROP0001S00019460	359902	NA	8	liver late up			1.488		NA	NA	NA	NA	NA	-
XTROP0001S00019982	364639	NA	8	liver late up			1.535		NA	IPR002110,Ankyrin;IPR008347,Vanilloid receptor;IPR008348,Vanilloid receptor 2;IPR005821,Ion transport protein;IPR002111,Cation (not K+) channel, TM region	NA	KOG3676|Ca2+-permeable cation channel OSM-9 and related channels (OTRPC family)|Signal transduction mechanisms |CELLULAR PROCESSES AND SIGNALING;KOG3676|Ca2+-permeable cation channel OSM-9 and related channels (OTRPC family)|Inorganic ion transport and metabolism |METABOLISM	NA	-
XTROP0001S00007653	377332	NA	8	liver late up			0.95		NA	NA	NA	KOG2992|Nucleolar GTPase/ATPase p130|Nuclear structure |CELLULAR PROCESSES AND SIGNALING	NA	-
XTROP0001S00032566	386144	NA	3	liver late up			1.95		NA	IPR001599,Alpha-2-macroglobulin;IPR001134,Netrin, C-terminal	NA	KOG1366|Alpha-macroglobulin|Posttranslational modification, protein turnover, chaperones |CELLULAR PROCESSES AND SIGNALING	NA	-
XTROP0001S00022747	391298	NA	8	liver late up			0.876		NA	IPR000719,Protein kinase;IPR001245,Tyrosine protein kinase;IPR002290,Serine/threonine protein kinase	Phosphotransferases with an alcohol group as acceptor.	NA	NA	-
XTROP0001S00020501	396637	ENSXETG00000012114	8	liver late up			1.94		TNFAIP3-interacting protein 2 (Fetal liver LKB1-interacting protein)(A20-binding inhibitor of NF-kappa-B activation 2)(ABIN-2) [Source:UniProtKB/Swiss-Prot;Acc:Q8NFZ5]	NA	NA	NA	NA	-
XTROP0001S00004304	423974	ENSXETG00000002950	8	liver late up			1.986		Calcium-binding protein 5 (CaBP5) [Source:UniProtKB/Swiss-Prot;Acc:Q9NP86]	IPR002048,Calcium-binding EF-hand	NA	KOG0027|Calmodulin and related proteins (EF-Hand superfamily)|Signal transduction mechanisms |CELLULAR PROCESSES AND SIGNALING	NA	-
XTROP0001S00026044	435537	ENSXETG00000004700	3	liver late up			3.066		Hemopexin Precursor (Beta-1B-glycoprotein) [Source:UniProtKB/Swiss-Prot;Acc:P02790]	IPR000585,Hemopexin	NA	NA	NA	-
XTROP0001S00030514	435537	ENSXETG00000004700	8	liver late up			3.275		Hemopexin Precursor (Beta-1B-glycoprotein) [Source:UniProtKB/Swiss-Prot;Acc:P02790]	IPR000585,Hemopexin	NA	NA	NA	-
XTROP0001S00015307	435832	NA	8	liver late up			1.523		NA	NA	NA	NA	NA	-
XTROP0001S00017109	437032	NA	8	liver late up			2.6		NA	IPR008146,Glutamine synthetase, catalytic region	NA	NA	1653|glutamate-ammonia ligase activity|molecular_function|GO:0004356; 3876|nitrogen compound metabolism|biological_process|GO:0006807	-
XTROP0001S00008675	439000	NA	8	liver late up			1.392		NA	NA	NA	NA	NA	-
XTROP0001S00010608	448679	NA	3	liver late up			1.731		NA	NA	NA	KOG1180|Acyl-CoA synthetase|Lipid transport and metabolism |METABOLISM	NA	-
XTROP0001S00032003	448679	NA	3	liver late up			1.48		NA	NA	NA	KOG1180|Acyl-CoA synthetase|Lipid transport and metabolism |METABOLISM	NA	-
XTROP0001S00032005	448679	NA	8	liver late up			1.554		NA	NA	NA	KOG1180|Acyl-CoA synthetase|Lipid transport and metabolism |METABOLISM	NA	-
XTROP0001S00017985	449224	ENSXETG00000014527	3	liver late up			1.367		Cysteine-rich with EGF-like domain protein 2 Precursor [Source:UniProtKB/Swiss-Prot;Acc:Q6UXH1]	IPR001881,EGF-like calcium-binding;IPR006210,Type I EGF;IPR006212,Furin-like repeat;NULL,NULL;IPR000152,Aspartic acid and asparagine hydroxylation site;IPR006209,EGF-like;IPR002049,Laminin-type EGF-like	NA	NA	2641|calcium ion binding|molecular_function|GO:0005509; 2434|structural molecule activity|molecular_function|GO:0005198	-
XTROP0001S00041416	449224	ENSXETG00000014527	8	liver late up			1.716		Cysteine-rich with EGF-like domain protein 2 Precursor [Source:UniProtKB/Swiss-Prot;Acc:Q6UXH1]	IPR001881,EGF-like calcium-binding;IPR006210,Type I EGF;IPR006212,Furin-like repeat;NULL,NULL;IPR000152,Aspartic acid and asparagine hydroxylation site;IPR006209,EGF-like;IPR002049,Laminin-type EGF-like	NA	NA	2641|calcium ion binding|molecular_function|GO:0005509; 2434|structural molecule activity|molecular_function|GO:0005198	-
XTROP0001S00008900	449985	ENSXETG00000015752	8	liver late up			1.256		DnaJ homolog subfamily B member 9 (Microvascular endothelial differentiation gene 1 protein)(Mdg-1) [Source:UniProtKB/Swiss-Prot;Acc:Q9UBS3]	IPR003095,Heat shock protein DnaJ;IPR001623,Heat shock protein DnaJ, N-terminal	NA	NA	3540|protein folding|biological_process|GO:0006457;11858|heat shock protein binding|molecular_function|GO:0031072;18577|unfolded protein binding|molecular_function|GO:0051082	-
XTROP0001S00005379	451803	ENSXETG00000009375	8	liver late up			1.032		Cytokine receptor common subunit beta Precursor (GM-CSF/IL-3/IL-5 receptor common beta-chain)(CDw131)(CD131 antigen) [Source:UniProtKB/Swiss-Prot;Acc:P32927]	IPR003961,Fibronectin, type III;IPR002996,Cytokine receptor, common beta/gamma chain;IPR003531,Short hematopoietin receptor, family 1	NA	NA	2153|hematopoietin/interferon-class (D200-domain) cytokine receptor activity|molecular_function|GO:0004896; 7826|membrane|cellular_component|GO:0016020	-
XTROP0001S00024931	452303	ENSXETG00000008473	8	liver late up			1.459		NA	NA	NA	NA	NA	-
XTROP0001S00021357	452922	ENSXETG00000000380	8	liver late up			1.957		Hypothetical protein MGC75673. [Source:UniProtKB/TrEMBL;Acc:Q6P348]	IPR008146,Glutamine synthetase, catalytic region;IPR008147,Glutamine synthetase, beta-Grasp	Glutamate--ammonia ligase.	NA	1653|glutamate-ammonia ligase activity|molecular_function|GO:0004356; 3876|nitrogen compound metabolism|biological_process|GO:0006807; 3621|glutamine biosynthesis|biological_process|GO:0006542	-
XTROP0001S00000086	455849	NA	8	liver late up			1.26		NA	NA	NA	NA	NA	-
XTROP0001S00022360	455887	NA	3	liver late up			1.537		NA	NA	NA	KOG0199|ACK and related non-receptor tyrosine kinases|Signal transduction mechanisms |CELLULAR PROCESSES AND SIGNALING	NA	-
XTROP0001S00030648	455887	NA	8	liver late up			2.07		NA	NA	NA	KOG0199|ACK and related non-receptor tyrosine kinases|Signal transduction mechanisms |CELLULAR PROCESSES AND SIGNALING	NA	-
XTROP0001S00018990	456246	NA	8	liver late up			1.302		NA	IPR000719,Protein kinase;IPR001245,Tyrosine protein kinase;IPR002290,Serine/threonine protein kinase;IPR008271,Serine/threonine protein kinase, active site	Protein-tyrosine kinase.	NA	NA	-
XTROP0001S00008986	456467	ENSXETG00000012764	8	liver late up			1.257		SEC6-like protein C14orf73 [Source:UniProtKB/Swiss-Prot;Acc:Q17RC7]	IPR010326,Exocyst complex component Sec6	NA	NA	NA	-
XTROP0001S00024659	459666	NA	8	liver late up			1.383		NA	IPR008404,Apovitellenin I	NA	NA	2118|enzyme inhibitor activity|molecular_function|GO:0004857; 3707|lipid metabolism|biological_process|GO:0006629;13183|chylomicron|cellular_component|GO:0042627	-
XTROP0001S00018883	461083	NA	8	liver late up			1.288		NA	IPR001841,Zn-finger, RING	NA	KOG2177|Predicted E3 ubiquitin ligase|Posttranslational modification, protein turnover, chaperones |CELLULAR PROCESSES AND SIGNALING	143|ubiquitin ligase complex|cellular_component|GO:0000151; 2103|ubiquitin-protein ligase activity|molecular_function|GO:0004842; 4913|zinc ion binding|molecular_function|GO:0008270; 8306|protein ubiquitination|biological_process|GO:0016567	-
XTROP0001S00006968	461238	ENSXETG00000001174	8	liver late up			0.953		NA	IPR005552,Scramblase	NA	NA	NA	-
XTROP0001S00032399	461265	NA	3	liver late up			1.027		NA	NA	NA	NA	NA	-
XTROP0001S00011305	468868	ENSXETG00000012429	8	liver late up			1.289		Long-chain-fatty-acid--CoA ligase 4 (EC 6.2.1.3)(Long-chain acyl-CoA synthetase 4)(LACS 4) [Source:UniProtKB/Swiss-Prot;Acc:O60488]	IPR000873,AMP-dependent synthetase and ligase	Long-chain-fatty-acid--CoA ligase.	KOG1180|Acyl-CoA synthetase|Lipid transport and metabolism |METABOLISM	NA	-
XTROP0001S00011474	473568	ENSXETG00000019238	8	liver late up			1.87		NA	IPR001436,Alpha crystallin;IPR002068,Heat shock protein Hsp20	NA	NA	NA	-
XTROP0001S00000013	476953	ENSXETG00000012730	8	liver late up			2.058		Stanniocalcin-2 Precursor (STC-2)(Stanniocalcin-related protein)(STCRP)(STC-related protein) [Source:UniProtKB/Swiss-Prot;Acc:O76061]	IPR004978,Stanniocalcin	NA	NA	2418|hormone activity|molecular_function|GO:0005179; 2700|extracellular region|cellular_component|GO:0005576	-
XTROP0001S00025486	477434	ENSXETG00000004086	8	liver late up			1.859		LOC613060 protein (Fragment). [Source:UniProtKB/TrEMBL;Acc:Q4VA81]	IPR002087,Anti-proliferative protein	NA	KOG4006|Anti-proliferation factor BTG1/TOB|Signal transduction mechanisms |CELLULAR PROCESSES AND SIGNALING;KOG4006|Anti-proliferation factor BTG1/TOB|General function prediction only |POORLY CHARACTERIZED	NA	-
XTROP0001S00004847	478000	ENSXETG00000018715	8	liver late up			4.731		Olfactomedin-4 Precursor (OLM4)(G-CSF-stimulated clone 1 protein)(hGC-1)(hOLfD)(Antiapoptotic protein GW112) [Source:UniProtKB/Swiss-Prot;Acc:Q6UX06]	IPR003924,Latrophilin receptor;IPR003112,Olfactomedin-like	NA	KOG3545|Olfactomedin and related extracellular matrix glycoproteins|Extracellular structures |CELLULAR PROCESSES AND SIGNALING	NA	-
XTROP0001S00031481	NA	ENSXETG00000002138	3	liver late up			2.978		NA	NA	NA	NA	NA	-
XTROP0001S00063512	NA	ENSXETG00000010951	3	liver late up			1.548		NA	NA	NA	NA	NA	-
XTROP0001S00063515	NA	ENSXETG00000010951	3	liver late up			1.565		NA	NA	NA	NA	NA	-
XTROP0001S00061390	NA	ENSXETG00000014574	3	liver late up			2.192		NA	NA	NA	NA	NA	-
XTROP0001S00006929	NA	ENSXETG00000015341	3	liver late up			1.276		NA	NA	NA	NA	NA	-
XTROP0001S00030055	NA	NA	3	liver late up			1.336		NA	NA	NA	NA	NA	-
XTROP0001S00030069	NA	NA	3	liver late up			2.491		NA	NA	NA	NA	NA	-
XTROP0001S00031231	NA	NA	3	liver late up			2.644		NA	NA	NA	NA	NA	-
XTROP0001S00031261	NA	NA	3	liver late up			2.457		NA	NA	NA	NA	NA	-
XTROP0001S00031406	NA	NA	3	liver late up			1.842		NA	NA	NA	NA	NA	-
XTROP0001S00032974	NA	NA	3	liver late up			2.205		NA	NA	NA	NA	NA	-
XTROP0001S00033315	NA	NA	3	liver late up			1.344		NA	NA	NA	NA	NA	-
XTROP0001S00033812	NA	NA	3	liver late up			1.758		NA	NA	NA	NA	NA	-
XTROP0001S00034311	NA	NA	3	liver late up			1.749		NA	NA	NA	NA	NA	-
XTROP0001S00034577	NA	NA	3	liver late up			2.617		NA	NA	NA	NA	NA	-
XTROP0001S00034579	NA	NA	3	liver late up			2.641		NA	NA	NA	NA	NA	-
XTROP0001S00034580	NA	NA	3	liver late up			2.766		NA	NA	NA	NA	NA	-
XTROP0001S00034819	NA	NA	3	liver late up			1.421		NA	NA	NA	NA	NA	-
XTROP0001S00034853	NA	NA	3	liver late up			1.795		NA	NA	NA	NA	NA	-
XTROP0001S00034967	NA	NA	3	liver late up			0.816		NA	NA	NA	NA	NA	-
XTROP0001S00036386	NA	NA	3	liver late up			2.856		NA	NA	NA	NA	NA	-
XTROP0001S00036387	NA	NA	3	liver late up			1.99		NA	NA	NA	NA	NA	-
XTROP0001S00036433	NA	NA	3	liver late up			2.264		NA	NA	NA	NA	NA	-
XTROP0001S00037867	NA	NA	3	liver late up			2.124		NA	NA	NA	NA	NA	-
XTROP0001S00039039	NA	NA	3	liver late up			1.259		NA	NA	NA	NA	NA	-
XTROP0001S00040170	NA	NA	3	liver late up			1.28		NA	NA	NA	NA	NA	-
XTROP0001S00040864	NA	NA	3	liver late up			2.004		NA	NA	NA	NA	NA	-
XTROP0001S00041001	NA	NA	3	liver late up			1.211		NA	NA	NA	NA	NA	-
XTROP0001S00042301	NA	NA	3	liver late up			2.219		NA	NA	NA	NA	NA	-
XTROP0001S00044097	NA	NA	3	liver late up			1.199		NA	NA	NA	NA	NA	-
XTROP0001S00044201	NA	NA	3	liver late up			2.161		NA	NA	NA	NA	NA	-
XTROP0001S00044738	NA	NA	3	liver late up			2.191		NA	NA	NA	NA	NA	-
XTROP0001S00047609	NA	NA	3	liver late up			1.586		NA	NA	NA	NA	NA	-
XTROP0001S00047919	NA	NA	3	liver late up			1.347		NA	NA	NA	NA	NA	-
XTROP0001S00048273	NA	NA	3	liver late up			2.52		NA	NA	NA	NA	NA	-
XTROP0001S00052580	NA	NA	3	liver late up			1.212		NA	NA	NA	NA	NA	-
XTROP0001S00053022	NA	NA	3	liver late up			1.641		NA	NA	NA	NA	NA	-
XTROP0001S00055381	NA	NA	3	liver late up			1.466		NA	NA	NA	NA	NA	-
XTROP0001S00056176	NA	NA	3	liver late up			2.032		NA	NA	NA	NA	NA	-
XTROP0001S00057390	NA	NA	3	liver late up			1.233		NA	NA	NA	NA	NA	-
XTROP0001S00058839	NA	NA	3	liver late up			1.41		NA	NA	NA	NA	NA	-
XTROP0001S00058941	NA	NA	3	liver late up			1.471		NA	NA	NA	NA	NA	-
XTROP0001S00060096	NA	NA	3	liver late up			1.602		NA	NA	NA	NA	NA	-
XTROP0001S00060778	NA	NA	3	liver late up			2.196		NA	NA	NA	NA	NA	-
XTROP0001S00061808	NA	NA	3	liver late up			1.577		NA	NA	NA	NA	NA	-
XTROP0001S00061809	NA	NA	3	liver late up			1.65		NA	NA	NA	NA	NA	-
XTROP0001S00062192	NA	NA	3	liver late up			2.321		NA	NA	NA	NA	NA	-
XTROP0001S00062996	NA	NA	3	liver late up			1.816		NA	NA	NA	NA	NA	-
XTROP0001S00062999	NA	NA	3	liver late up			2.084		NA	NA	NA	NA	NA	-
XTROP0001S00063353	NA	NA	3	liver late up			2.11		NA	NA	NA	NA	NA	-
XTROP0001S00064017	NA	NA	3	liver late up			1.229		NA	NA	NA	NA	NA	-
XTROP0001S00064197	NA	NA	3	liver late up			0.915		NA	NA	NA	NA	NA	-
XTROP0001S00066627	NA	NA	3	liver late up			1.958		NA	NA	NA	NA	NA	-
XTROP0001S00062997	NA	ENSXETG00000006998	3	liver late up			1.378		NF-kappa-B inhibitor zeta (I-kappa-B-zeta)(IkappaBzeta)(IkB-zeta)(Molecule possessing ankyrin repeats induced by lipopolysaccharide)(MAIL)(IL-1 inducible nuclear ankyrin-repeat protein)(INAP) [Source:UniProtKB/Swiss-Prot;Acc:Q9BYH8]	NA	NA	NA	NA	-
XTROP0001S00040064	NA	ENSXETG00000019411	3	liver late up			0.991		Similar to transcription factor MAFB (Leucine zipper transcription factor). [Source:UniProtKB/TrEMBL;Acc:Q504L8]	NA	NA	NA	NA	-
XTROP0001S00004416	107319	NA	8	liver late up, skin late up			1.409	1.808	NA	IPR001820,Tissue inhibitor of metalloproteinase	NA	KOG4745|Metalloproteinase inhibitor TIMP and related proteins|General function prediction only |POORLY CHARACTERIZED	2702|extracellular matrix (sensu Metazoa)|cellular_component|GO:0005578; 4839|metalloendopeptidase inhibitor activity|molecular_function|GO:0008191	-
XTROP0001S00001251	151073	NA	8	liver late up, skin late up			2.134	2.136	NA	IPR002112,Transcription factor Jun;IPR004827,Basic-leucine zipper (bZIP) transcription factor;IPR005643,Jun-like transcription factor	NA	NA	1076|transcription factor activity|molecular_function|GO:0003700; 2757|nucleus|cellular_component|GO:0005634; 3449|regulation of transcription, DNA-dependent|biological_process|GO:0006355; 1056|DNA binding|molecular_function|GO:0003677	-
XTROP0001S00004720	164392	ENSXETG00000027407	3	liver late up, skin late up			1.853	1.547	MGC108044 protein. [Source:UniProtKB/TrEMBL;Acc:Q5EAM9]	IPR004455,NADP oxidoreductase, coenzyme F420-dependent	NA	NA	3218|electron transport|biological_process|GO:0006118	-
XTROP0001S00034405	164392	ENSXETG00000027407	8	liver late up, skin late up			2.226	1.747	MGC108044 protein. [Source:UniProtKB/TrEMBL;Acc:Q5EAM9]	IPR004455,NADP oxidoreductase, coenzyme F420-dependent	NA	NA	3218|electron transport|biological_process|GO:0006118	-
XTROP0001S00008790	164394	ENSXETG00000008794	8	liver late up, skin late up			3.745	1.954	NA	IPR004455,NADP oxidoreductase, coenzyme F420-dependent	NA	NA	3218|electron transport|biological_process|GO:0006118	-
XTROP0001S00026721	166058	NA	8	liver late up, skin late up			1.451	1.189	NA	IPR002181,Fibrinogen, beta/gamma chain, C-terminal globular	NA	NA	NA	-
XTROP0001S00008447	196068	ENSXETG00000007373	8	liver late up, skin late up			4.611	4.429	NA	IPR000183,Orn/DAP/Arg decarboxylase 2;IPR002433,Ornithine decarboxylase	NA	KOG0622|Ornithine decarboxylase|Amino acid transport and metabolism |METABOLISM	NA	-
XTROP0001S00016108	272610	ENSXETG00000011677	8	liver late up, skin late up			1.299	2.168	MGC108324 protein. [Source:UniProtKB/TrEMBL;Acc:Q5FVY2]	IPR001806,Ras GTPase;IPR003577,Ras small GTPase, Ras type;IPR003578,Ras small GTPase, Rho type;IPR003579,Ras small GTPase, Rab type;IPR005225,Small GTP-binding protein domain	NA	NA	2654|GTP binding|molecular_function|GO:0005525; 4307|small GTPase mediated signal transduction|biological_process|GO:0007264; 6867|protein transport|biological_process|GO:0015031	-
XTROP0001S00008591	278106	ENSXETG00000026537	8	liver late up, skin late up			2.717	2.271	MGC89481 protein. [Source:UniProtKB/TrEMBL;Acc:Q6DIJ3]	IPR004038,Ribosomal protein L7Ae/L30e/S12e/Gadd45	NA	NA	NA	-
XTROP0001S00021243	284956	ENSXETG00000003519	8	liver late up, skin late up			2.501	3.282	Ornithine decarboxylase 1. [Source:UniProtKB/TrEMBL;Acc:Q6GLE9]	IPR000183,Orn/DAP/Arg decarboxylase 2;IPR002433,Ornithine decarboxylase	Ornithine decarboxylase.	NA	1170|catalytic activity|molecular_function|GO:0003824; 3674|polyamine biosynthesis|biological_process|GO:0006596; 1858|ornithine decarboxylase activity|molecular_function|GO:0004586	-
XTROP0001S00032380	291885	NA	3	liver late up, skin late up			2.009	2.057	NA	IPR000719,Protein kinase;IPR001245,Tyrosine protein kinase;IPR002290,Serine/threonine protein kinase;IPR008271,Serine/threonine protein kinase, active site;IPR003006,Immunoglobulin/major histocompatibility complex	Protein kinase.	KOG0583|Serine/threonine protein kinase|Signal transduction mechanisms |CELLULAR PROCESSES AND SIGNALING	NA	-
XTROP0001S00032382	291885	NA	3	liver late up, skin late up			1.795	1.748	NA	IPR000719,Protein kinase;IPR001245,Tyrosine protein kinase;IPR002290,Serine/threonine protein kinase;IPR008271,Serine/threonine protein kinase, active site;IPR003006,Immunoglobulin/major histocompatibility complex	Protein kinase.	KOG0583|Serine/threonine protein kinase|Signal transduction mechanisms |CELLULAR PROCESSES AND SIGNALING	NA	-
XTROP0001S00032381	291885	ENSXETG00000014529	3	liver late up, skin late up			1.817	1.736	Serine/threonine-protein kinase Pim-3 (EC 2.7.11.1) [Source:UniProtKB/Swiss-Prot;Acc:Q86V86]	IPR000719,Protein kinase;IPR001245,Tyrosine protein kinase;IPR002290,Serine/threonine protein kinase;IPR008271,Serine/threonine protein kinase, active site;IPR003006,Immunoglobulin/major histocompatibility complex	Protein kinase.	KOG0583|Serine/threonine protein kinase|Signal transduction mechanisms |CELLULAR PROCESSES AND SIGNALING	NA	-
XTROP0001S00046467	294579	ENSXETG00000026780	3	liver late up, skin late up			2.559	1.849	Lysozyme C Precursor (EC 3.2.1.17)(1,4-beta-N-acetylmuramidase C) [Source:UniProtKB/Swiss-Prot;Acc:P61626]	IPR001916,Glycoside hydrolase, family 22;IPR000974,Glycoside hydrolase, family 22, lysozyme	Lysozyme.	NA	NA	-
XTROP0001S00020337	295202	ENSXETG00000007373	8	liver late up, skin late up			5.222	4.82	NA	IPR000183,Orn/DAP/Arg decarboxylase 2;IPR002433,Ornithine decarboxylase	Ornithine decarboxylase.	NA	1170|catalytic activity|molecular_function|GO:0003824; 3674|polyamine biosynthesis|biological_process|GO:0006596; 1858|ornithine decarboxylase activity|molecular_function|GO:0004586	-
XTROP0001S00019335	296708	ENSXETG00000027626	3	liver late up, skin late up			1.151	1.649	Transmembrane protein 2 [Source:UniProtKB/Swiss-Prot;Acc:Q9UHN6]	NA	NA	NA	NA	-
XTROP0001S00053988	296708	ENSXETG00000027626	8	liver late up, skin late up			0.944	1.002	Transmembrane protein 2 [Source:UniProtKB/Swiss-Prot;Acc:Q9UHN6]	NA	NA	NA	NA	-
XTROP0001S00006000	335826	NA	3	liver late up, skin late up			1.143	1.79	NA	IPR008161,Collagen helix repeat;IPR002181,Fibrinogen, beta/gamma chain, C-terminal globular;IPR008160,Collagen triple helix repeat	NA	NA	2855|cytoplasm|cellular_component|GO:0005737; 3886|phosphate transport|biological_process|GO:0006817	-
XTROP0001S00027148	361977	ENSXETG00000006714	8	liver late up, skin late up			2.14	2.328	NA	IPR001023,Heat shock protein Hsp70	NA	NA	NA	-
XTROP0001S00009940	362046	ENSXETG00000020495	3	liver late up, skin late up			1.497	1.82	NA	IPR007593,Interferon-induced transmembrane protein	NA	NA	NA	-
XTROP0001S00043582	362046	NA	8	liver late up, skin late up			1.415	1.473	NA	IPR007593,Interferon-induced transmembrane protein	NA	NA	NA	-
XTROP0001S00017074	364072	ENSXETG00000007321	8	liver late up, skin late up			1.036	1.058	Chemokine receptor-like 1 (G-protein coupled receptor DEZ) (G-protein coupled receptor ChemR23). [Source:UniProtKB/Swiss-Prot;Acc:Q99788] [from human gene ENSG00000174600]	IPR000276,Rhodopsin-like GPCR superfamily;IPR000826,Formyl/methionyl peptide receptor	NA	NA	NA	-
XTROP0001S00008754	364694	ENSXETG00000003136	8	liver late up, skin late up			2.993	2.071	NA	IPR002110,Ankyrin;IPR008347,Vanilloid receptor;IPR008348,Vanilloid receptor 2;IPR005821,Ion transport protein;IPR002111,Cation (not K+) channel, TM region	NA	KOG3676|Ca2+-permeable cation channel OSM-9 and related channels (OTRPC family)|Signal transduction mechanisms |CELLULAR PROCESSES AND SIGNALING;KOG3676|Ca2+-permeable cation channel OSM-9 and related channels (OTRPC family)|Inorganic ion transport and metabolism |METABOLISM	NA	-
XTROP0001S00023834	433980	ENSXETG00000027465	8	liver late up, skin late up			2.959	1.509	NA	IPR001436,Alpha crystallin;IPR002068,Heat shock protein Hsp20	NA	KOG3591|Alpha crystallins|Posttranslational modification, protein turnover, chaperones |CELLULAR PROCESSES AND SIGNALING	NA	-
XTROP0001S00019361	436644	ENSXETG00000023798	8	liver late up, skin late up			2.185	1.663	MGC89163 protein (Hypothetical protein). [Source:UniProtKB/TrEMBL;Acc:Q6DJ80]	IPR000753,Clusterin	NA	NA	4867|cell death|biological_process|GO:0008219	-
XTROP0001S00013107	449298	NA	8	liver late up, skin late up			2.785	3.773	NA	IPR000169,Peptidase, eukaryotic cysteine peptidase active site	NA	NA	1525|cysteine-type endopeptidase activity|molecular_function|GO:0004197; 3588|proteolysis and peptidolysis|biological_process|GO:0006508	-
XTROP0001S00004441	452655	ENSXETG00000005526	8	liver late up, skin late up			1.479	1.445	Cationic amino acid transporter 3 (CAT-3)(Cationic amino acid transporter y+)(Solute carrier family 7 member 3) [Source:UniProtKB/Swiss-Prot;Acc:Q8WY07]	IPR004841,Amino acid permease-associated region;IPR004755,Cationic amino acid transport permease;IPR002293,Amino acid/polyamine transporter I	NA	KOG1286|Amino acid transporters|Amino acid transport and metabolism |METABOLISM	2494|amino acid-polyamine transporter activity|molecular_function|GO:0005279; 3929|amino acid transport|biological_process|GO:0006865; 7826|membrane|cellular_component|GO:0016020; 7184|amino acid permease activity|molecular_function|GO:0015359; 7827|integral to membrane|cellular_component|GO:0016021; 3879|transport|biological_process|GO:0006810	-
XTROP0001S00002789	454017	ENSXETG00000024632	8	liver late up, skin late up			1.891	2.303	Suppressor of cytokine signaling 3. [Source:UniProtKB/TrEMBL;Acc:Q6DJC0]	IPR000980,SH2 motif;IPR001496,SOCS protein, C-terminal	NA	NA	4286|intracellular signaling cascade|biological_process|GO:0007242	-
XTROP0001S00026272	456096	ENSXETG00000008828	8	liver late up, skin late up			2.279	2.836	NA	IPR001023,Heat shock protein Hsp70	NA	KOG0101|Molecular chaperones HSP70/HSC70, HSP70 superfamily|Posttranslational modification, protein turnover, chaperones |CELLULAR PROCESSES AND SIGNALING	NA	-
XTROP0001S00007267	476253	ENSXETG00000022198	8	liver late up, skin late up			2.195	4.004	NA	IPR001818,Peptidase M10A and M12B, matrixin and adamalysin;IPR000585,Hemopexin;IPR006026,Peptidase, metallopeptidases;IPR006025,Peptidase M, neutral zinc metallopeptidases, zinc-binding site	NA	KOG1565|Gelatinase A and related matrix metalloproteases|Extracellular structures |CELLULAR PROCESSES AND SIGNALING;KOG1565|Gelatinase A and related matrix metalloproteases|Posttranslational modification, protein turnover, chaperones |CELLULAR PROCESSES AND SIGNALING	1549|metalloendopeptidase activity|molecular_function|GO:0004222; 2702|extracellular matrix (sensu Metazoa)|cellular_component|GO:0005578; 3588|proteolysis and peptidolysis|biological_process|GO:0006508; 4883|metallopeptidase activity|molecular_function|GO:0008237; 4913|zinc ion binding|molecular_function|GO:0008270	-
XTROP0001S00046028	NA	NA	3	liver late up, skin late up			2.67	3.749	NA	NA	NA	NA	NA	-
XTROP0001S00054343	NA	NA	3	liver late up, skin late up			2.162	1.915	NA	NA	NA	NA	NA	-
XTROP0001S00058676	NA	NA	3	liver late up, skin late up			1.801	1.745	NA	NA	NA	NA	NA	-
XTROP0001S00022036	455576	NA	8	skin late down				-2.369	NA	IPR008197,Whey acidic protein, core region;IPR007087,Zn-finger, C2H2 type	NA	NA	NA	-
XTROP0001S00063880	NA	ENSXETG00000012783	3	skin late down				-1.212	MGC69514 protein. [Source:UniProtKB/TrEMBL;Acc:Q5BL55]	NA	NA	NA	NA	-
XTROP0001S00033218	NA	NA	3	skin late down				-2.482	NA	NA	NA	NA	NA	-
XTROP0001S00033452	NA	NA	3	skin late down				-1.853	NA	NA	NA	NA	NA	-
XTROP0001S00037393	NA	NA	3	skin late down				-1.98	NA	NA	NA	NA	NA	-
XTROP0001S00017495	148752	ENSXETG00000009309	3	skin late up				1.876	MGC107871 protein. [Source:UniProtKB/TrEMBL;Acc:Q5FW26]	IPR000980,SH2 motif;IPR001849,Pleckstrin-like	NA	KOG4226|Adaptor protein NCK/Dock, contains SH2 and SH3 domains|Signal transduction mechanisms |CELLULAR PROCESSES AND SIGNALING	NA	-
XTROP0001S00035145	148752	ENSXETG00000009309	8	skin late up				2.336	MGC107871 protein. [Source:UniProtKB/TrEMBL;Acc:Q5FW26]	IPR000980,SH2 motif;IPR001849,Pleckstrin-like	NA	KOG4226|Adaptor protein NCK/Dock, contains SH2 and SH3 domains|Signal transduction mechanisms |CELLULAR PROCESSES AND SIGNALING	NA	-
XTROP0001S00021300	148845	ENSXETG00000021304	8	skin late up				2.125	NA	IPR001818,Peptidase M10A and M12B, matrixin and adamalysin;IPR000585,Hemopexin;IPR006026,Peptidase, metallopeptidases;IPR006025,Peptidase M, neutral zinc metallopeptidases, zinc-binding site	Stromelysin 1.	NA	NA	-
XTROP0001S00007170	149310	ENSXETG00000002772	8	skin late up				2.085	Rho GDP dissociation inhibitor (GDI) beta. [Source:UniProtKB/TrEMBL;Acc:Q6DF26]	IPR000406,RHO protein GDP dissociation inhibitor;IPR008162,Inorganic pyrophosphatase	NA	KOG3205|Rho GDP-dissociation inhibitor|Signal transduction mechanisms |CELLULAR PROCESSES AND SIGNALING	NA	-
XTROP0001S00019160	150390	NA	3	skin late up				1.61	NA	NA	Myosin ATPase.	NA	5196|myosin ATPase activity|molecular_function|GO:0008570	-
XTROP0001S00063374	150390	NA	8	skin late up				1.549	NA	NA	Myosin ATPase.	NA	5196|myosin ATPase activity|molecular_function|GO:0008570	-
XTROP0001S00011925	163909	ENSXETG00000019349	8	skin late up				1.761	Latent-transforming growth factor beta-binding protein, isoform 1L Precursor (LTBP-1)(Transforming growth factor beta-1-binding protein 1)(TGF-beta1-BP-1) [Source:UniProtKB/Swiss-Prot;Acc:Q14766]	IPR006209,EGF-like;IPR002212,Matrix fibril-associated;IPR001881,EGF-like calcium-binding;IPR006210,Type I EGF;NULL,NULL;IPR000152,Aspartic acid and asparagine hydroxylation site	NA	NA	NA	-
XTROP0001S00000026	165447	ENSXETG00000022195	8	skin late up				3.922	Neutrophil collagenase precursor (EC 3.4.24.34) (Matrix metalloproteinase-8) (MMP-8) (PMNL collagenase) (PMNL-CL). [Source:UniProtKB/Swiss-Prot;Acc:P22894] [from human gene ENSG00000118113]	IPR001818,Peptidase M10A and M12B, matrixin and adamalysin;IPR000585,Hemopexin;IPR006026,Peptidase, metallopeptidases;IPR006025,Peptidase M, neutral zinc metallopeptidases, zinc-binding site	Stromelysin 1.	NA	1549|metalloendopeptidase activity|molecular_function|GO:0004222; 2702|extracellular matrix (sensu Metazoa)|cellular_component|GO:0005578; 3588|proteolysis and peptidolysis|biological_process|GO:0006508; 4883|metallopeptidase activity|molecular_function|GO:0008237; 4913|zinc ion binding|molecular_function|GO:0008270; 1569|stromelysin 1 activity|molecular_function|GO:0004248;11116|stromelysin 2 ac…	-
XTROP0001S00008522	166147	ENSXETG00000009811	8	skin late up				1.592	MGC79716 protein. [Source:UniProtKB/TrEMBL;Acc:Q66JC6]	IPR001806,Ras GTPase;IPR003577,Ras small GTPase, Ras type;IPR003578,Ras small GTPase, Rho type;IPR003579,Ras small GTPase, Rab type;IPR005225,Small GTP-binding protein domain	NA	NA	2654|GTP binding|molecular_function|GO:0005525; 4307|small GTPase mediated signal transduction|biological_process|GO:0007264; 6867|protein transport|biological_process|GO:0015031	-
XTROP0001S00034904	174848	ENSXETG00000020934	3	skin late up				1.541	Hypothetical LOC496712. [Source:UniProtKB/TrEMBL;Acc:Q5M8L8]	IPR005820,Cation channel, non-ligand gated	NA	NA	2485|cation channel activity|molecular_function|GO:0005261; 3881|cation transport|biological_process|GO:0006812; 7826|membrane|cellular_component|GO:0016020	-
XTROP0001S00014522	175537	ENSXETG00000026112	3	skin late up				2.538	Hypothetical protein. [Source:UniProtKB/TrEMBL;Acc:Q5BJ47]	IPR000500,Connexins	NA	NA	3026|connexon complex|cellular_component|GO:0005922; 4200|cell communication|biological_process|GO:0007154; 7114|connexon channel activity|molecular_function|GO:0015285	-
XTROP0001S00031273	175537	ENSXETG00000026112	8	skin late up				2.29	Hypothetical protein. [Source:UniProtKB/TrEMBL;Acc:Q5BJ47]	IPR000500,Connexins	NA	NA	3026|connexon complex|cellular_component|GO:0005922; 4200|cell communication|biological_process|GO:0007154; 7114|connexon channel activity|molecular_function|GO:0015285	-
XTROP0001S00010970	178963	ENSXETG00000012482	8	skin late up				3.269	Keratin, type I cuticular Ha6 (Hair keratin, type I Ha6). [Source:UniProtKB/Swiss-Prot;Acc:O76013] [from human gene ENSG00000126337]	IPR002957,Keratin, type I;IPR001664,Intermediate filament protein	NA	KOG0977|Nuclear envelope protein lamin, intermediate filament superfamily|Cell cycle control, cell division, chromosome partitioning |METABOLISM;KOG0977|Nuclear envelope protein lamin, intermediate filament superfamily|Nuclear structure |CELLULAR PROCESSES AND SIGNALING	NA	-
XTROP0001S00008965	187450	ENSXETG00000017431	8	skin late up				1.553	Cytochrome b-245 light chain (p22 phagocyte B-cytochrome)(Neutrophil cytochrome b 22 kDa polypeptide)(p22-phox)(p22phox)(Cytochrome b(558) alpha chain)(Cytochrome b558 subunit alpha)(Superoxide-generating NADPH oxidase light chain subunit) [Source:UniProtKB/Swiss-Prot;Acc:P13498]	IPR007732,Cytochrome b558 alpha-subunit	NA	NA	3218|electron transport|biological_process|GO:0006118;10820|heme binding|molecular_function|GO:0020037	-
XTROP0001S00024398	189022	NA	8	skin late up				1.814	NA	IPR000272,FXYD	NA	NA	2451|ion channel activity|molecular_function|GO:0005216; 3880|ion transport|biological_process|GO:0006811; 7826|membrane|cellular_component|GO:0016020	-
XTROP0001S00019466	265029	ENSXETG00000020374	8	skin late up				1.238	cAMP-specific 3',5'-cyclic phosphodiesterase 4B (EC 3.1.4.17)(DPDE4)(PDE32) [Source:UniProtKB/Swiss-Prot;Acc:Q07343]	IPR002073,3'5'-cyclic nucleotide phosphodiesterase;IPR003607,Metal-dependent phosphohydrolase, HD region	3',5'-cyclic-nucleotide phosphodiesterase.	KOG3689|Cyclic nucleotide phosphodiesterase|Signal transduction mechanisms |CELLULAR PROCESSES AND SIGNALING	NA	-
XTROP0001S00002611	269692	ENSXETG00000019727	8	skin late up				2.141	Eosinophil peroxidase precursor (EC 1.11.1.7) (EPO) [Contains: Eosinophil peroxidase light chain; Eosinophil peroxidase heavy chain]. [Source:UniProtKB/Swiss-Prot;Acc:P11678] [from human gene ENSG00000121053]	IPR002007,Animal haem peroxidase	Peroxidase.	KOG2408|Peroxidase/oxygenase|General function prediction only |POORLY CHARACTERIZED	1872|peroxidase activity|molecular_function|GO:0004601	-
XTROP0001S00017814	276369	ENSXETG00000008241	3	skin late up				1.757	Arginase, liver. [Source:UniProtKB/TrEMBL;Acc:Q6DIU5]	IPR005924,Arginase;IPR006035,Arginase/agmatinase/formiminoglutamase	Arginase.	KOG2965|Arginase|Amino acid transport and metabolism |METABOLISM	1384|arginase activity|molecular_function|GO:0004053; 3606|arginine catabolism|biological_process|GO:0006527; 1170|catalytic activity|molecular_function|GO:0003824	-
XTROP0001S00062525	276369	NA	8	skin late up				2.019	NA	IPR005924,Arginase;IPR006035,Arginase/agmatinase/formiminoglutamase	Arginase.	KOG2965|Arginase|Amino acid transport and metabolism |METABOLISM	1384|arginase activity|molecular_function|GO:0004053; 3606|arginine catabolism|biological_process|GO:0006527; 1170|catalytic activity|molecular_function|GO:0003824	-
XTROP0001S00030606	277834	ENSXETG00000015190	3	skin late up				1.624	Atp4a-prov protein. [Source:UniProtKB/TrEMBL;Acc:Q5BL65]	IPR001757,ATPase, E1-E2 type;IPR006069,Cation transporting ATPase;IPR008250,E1-E2 ATPase-associated region;IPR006068,Cation transporting ATPase, C-terminal;IPR004014,Cation transporting ATPase, N-terminal;IPR005834,Haloacid dehalogenase-like hydrolase;IPR005775,Na+/K+ ATPase, alpha subunit	Hydrogen/potassium-exchanging ATPase.	NA	2653|ATP binding|molecular_function|GO:0005524; 3881|cation transport|biological_process|GO:0006812; 7479|ATPase activity, coupled to transmembrane movement of ions, phosphorylative mechanism|molecular_function|GO:0015662; 7826|membrane|cellular_component|GO:0016020; 6912|monovalent inorganic cation transporter activity|molecular_function|GO:0015077; 7489|monovalent inorganic cation transport|bio…	-
XTROP0001S00014131	292568	ENSXETG00000017378	3	skin late up				2.111	Similar to prostaglandin-endoperoxide synthase 2. [Source:UniProtKB/TrEMBL;Acc:Q501R2]	IPR002007,Animal haem peroxidase;IPR006209,EGF-like	Prostaglandin-endoperoxide synthase.	KOG2408|Peroxidase/oxygenase|General function prediction only |POORLY CHARACTERIZED	NA	-
XTROP0001S00063030	292568	ENSXETG00000017378	8	skin late up				1.83	Similar to prostaglandin-endoperoxide synthase 2. [Source:UniProtKB/TrEMBL;Acc:Q501R2]	IPR002007,Animal haem peroxidase;IPR006209,EGF-like	Prostaglandin-endoperoxide synthase.	KOG2408|Peroxidase/oxygenase|General function prediction only |POORLY CHARACTERIZED	NA	-
XTROP0001S00024401	296153	ENSXETG00000026058	3	skin late up				2.459	MGC69564 protein. [Source:UniProtKB/TrEMBL;Acc:Q6DK93]	IPR006461,Uncharacterized Cys-rich domain	NA	NA	NA	-
XTROP0001S00062067	296153	ENSXETG00000026058	8	skin late up				3.692	MGC69564 protein. [Source:UniProtKB/TrEMBL;Acc:Q6DK93]	IPR006461,Uncharacterized Cys-rich domain	NA	NA	NA	-
XTROP0001S00026903	317405	ENSXETG00000019734	8	skin late up				1.404	Fibroleukin Precursor (Fibrinogen-like protein 2)(pT49) [Source:UniProtKB/Swiss-Prot;Acc:Q14314]	IPR002181,Fibrinogen, beta/gamma chain, C-terminal globular	NA	KOG2579|Ficolin and related extracellular proteins|General function prediction only |POORLY CHARACTERIZED	NA	-
XTROP0001S00026067	332880	NA	8	skin late up				3.132	NA	NA	NA	NA	NA	-
XTROP0001S00024160	333015	NA	8	skin late up				2.234	NA	NA	NA	NA	NA	-
XTROP0001S00034772	335826	NA	8	skin late up				2.075	NA	IPR008161,Collagen helix repeat;IPR002181,Fibrinogen, beta/gamma chain, C-terminal globular;IPR008160,Collagen triple helix repeat	NA	NA	2855|cytoplasm|cellular_component|GO:0005737; 3886|phosphate transport|biological_process|GO:0006817	-
XTROP0001S00023225	336019	NA	8	skin late up				1.514	NA	IPR002181,Fibrinogen, beta/gamma chain, C-terminal globular	NA	KOG2579|Ficolin and related extracellular proteins|General function prediction only |POORLY CHARACTERIZED	NA	-
XTROP0001S00019911	358544	ENSXETG00000024640	8	skin late up				1.822	NA	IPR002226,Catalase	Catalase.	NA	NA	-
XTROP0001S00019172	416168	ENSXETG00000027993	8	skin late up				1.597	Apoptosis facilitator Bcl-2-like 14 protein (Apoptosis regulator Bcl-G) [Source:UniProtKB/Swiss-Prot;Acc:Q9BZR8]	IPR002475,BCL2-like apoptosis inhibitor	NA	NA	NA	-
XTROP0001S00004766	451941	ENSXETG00000016946	3	skin late up				1.882	DnaJ homolog subfamily A member 4 [Source:UniProtKB/Swiss-Prot;Acc:Q8WW22]	IPR003095,Heat shock protein DnaJ;IPR001623,Heat shock protein DnaJ, N-terminal;IPR001305,DnaJ central region;IPR002939,Chaperone DnaJ, C-terminal;IPR000345,Cytochrome c heme-binding site	NA	KOG0712|Molecular chaperone (DnaJ superfamily)|Posttranslational modification, protein turnover, chaperones |CELLULAR PROCESSES AND SIGNALING	3540|protein folding|biological_process|GO:0006457;11858|heat shock protein binding|molecular_function|GO:0031072;18577|unfolded protein binding|molecular_function|GO:0051082	-
XTROP0001S00031963	451941	ENSXETG00000016946	8	skin late up				1.412	DnaJ homolog subfamily A member 4 [Source:UniProtKB/Swiss-Prot;Acc:Q8WW22]	IPR003095,Heat shock protein DnaJ;IPR001623,Heat shock protein DnaJ, N-terminal;IPR001305,DnaJ central region;IPR002939,Chaperone DnaJ, C-terminal;IPR000345,Cytochrome c heme-binding site	NA	KOG0712|Molecular chaperone (DnaJ superfamily)|Posttranslational modification, protein turnover, chaperones |CELLULAR PROCESSES AND SIGNALING	3540|protein folding|biological_process|GO:0006457;11858|heat shock protein binding|molecular_function|GO:0031072;18577|unfolded protein binding|molecular_function|GO:0051082	-
XTROP0001S00011697	453208	NA	8	skin late up				1.838	NA	IPR001312,Hexokinase	Hexokinase.	KOG1369|Hexokinase|Carbohydrate transport and metabolism |METABOLISM	1687|hexokinase activity|molecular_function|GO:0004396; 2653|ATP binding|molecular_function|GO:0005524; 3196|glycolysis|biological_process|GO:0006096	-
XTROP0001S00008044	475174	ENSXETG00000017213	8	skin late up				2.001	MGC97639 protein. [Source:UniProtKB/TrEMBL;Acc:Q5FVB3]	IPR004743,Monocarboxylate transporter;IPR007114,Major facilitator superfamily	NA	NA	7181|monocarboxylate porter activity|molecular_function|GO:0015355; 7527|organic anion transport|biological_process|GO:0015711; 7827|integral to membrane|cellular_component|GO:0016021; 2450|transporter activity|molecular_function|GO:0005215; 3879|transport|biological_process|GO:0006810	-
XTROP0001S00025108	475981	ENSXETG00000004629	8	skin late up				1.504	Hypothetical LOC496738. [Source:UniProtKB/TrEMBL;Acc:Q5M8J2]	IPR001806,Ras GTPase;IPR003577,Ras small GTPase, Ras type;IPR003578,Ras small GTPase, Rho type;IPR003579,Ras small GTPase, Rab type;IPR002041,GTP-binding nuclear protein Ran;IPR005225,Small GTP-binding protein domain	NA	NA	2654|GTP binding|molecular_function|GO:0005525; 4307|small GTPase mediated signal transduction|biological_process|GO:0007264; 3946|intracellular protein transport|biological_process|GO:0006886; 6867|protein transport|biological_process|GO:0015031	-
XTROP0001S00031149	NA	NA	3	skin late up				1.696	NA	NA	NA	NA	NA	-
XTROP0001S00031991	NA	NA	3	skin late up				1.408	NA	NA	NA	NA	NA	-
XTROP0001S00032041	NA	NA	3	skin late up				1.609	NA	NA	NA	NA	NA	-
XTROP0001S00032612	NA	NA	3	skin late up				0.961	NA	NA	NA	NA	NA	-
XTROP0001S00033426	NA	NA	3	skin late up				1.121	NA	NA	NA	NA	NA	-
XTROP0001S00033570	NA	NA	3	skin late up				2.48	NA	NA	NA	NA	NA	-
XTROP0001S00033672	NA	NA	3	skin late up				1.909	NA	NA	NA	NA	NA	-
XTROP0001S00037099	NA	NA	3	skin late up				1.448	NA	NA	NA	NA	NA	-
XTROP0001S00037866	NA	NA	3	skin late up				1.761	NA	NA	NA	NA	NA	-
XTROP0001S00038308	NA	NA	8	skin late up				1.303	NA	NA	NA	NA	NA	-
XTROP0001S00041041	NA	NA	8	skin late up				1.707	NA	NA	NA	NA	NA	-
XTROP0001S00047578	NA	NA	8	skin late up				1.296	NA	NA	NA	NA	NA	-
XTROP0001S00048446	NA	NA	8	skin late up				1.531	NA	NA	NA	NA	NA	-
XTROP0001S00063212	NA	NA	8	skin late up				2.065	NA	NA	NA	NA	NA	-
XTROP0001S00065631	NA	NA	8	skin late up				2.026	NA	NA	NA	NA	NA	-
